# Supplementary material for: Disentangling quality and safety indicator data: a longitudinal, comparative study of hand hygiene compliance and accreditation outcomes in 96 Australian hospitals
Source: PubMed Central journal article supplement — BMJ Open. 2014 Sep 23;4(9):e005284. doi: 10.1136/bmjopen-2014-005284 (PMC4173108; doi:10.1136/bmjopen-2014-005284), 2014-09-23
Supplement: bmjopen-2014-005284.draft_revisions.pdf [file bmjopen-2014-005284.draft_revisions.pdf]

# BMJ Open

## Disentangling quality and safety indicator data: a longitudinal, comparative study of hand hygiene compliance and accreditation outcomes in 96 Australian hospitals

|                                 |                                                                                                                                                                                                                                                                                                                                                                                                                                                                                                                                                                                                                                                                                                                                                                                                                                                      |
|---------------------------------|------------------------------------------------------------------------------------------------------------------------------------------------------------------------------------------------------------------------------------------------------------------------------------------------------------------------------------------------------------------------------------------------------------------------------------------------------------------------------------------------------------------------------------------------------------------------------------------------------------------------------------------------------------------------------------------------------------------------------------------------------------------------------------------------------------------------------------------------------|
| Journal:                        | <i>BMJ Open</i>                                                                                                                                                                                                                                                                                                                                                                                                                                                                                                                                                                                                                                                                                                                                                                                                                                      |
| Manuscript ID:                  | bmjopen-2014-005284                                                                                                                                                                                                                                                                                                                                                                                                                                                                                                                                                                                                                                                                                                                                                                                                                                  |
| Article Type:                   | Research                                                                                                                                                                                                                                                                                                                                                                                                                                                                                                                                                                                                                                                                                                                                                                                                                                             |
| Date Submitted by the Author:   | 18-Mar-2014                                                                                                                                                                                                                                                                                                                                                                                                                                                                                                                                                                                                                                                                                                                                                                                                                                          |
| Complete List of Authors:       | Mumford, Virginia; University of New South Wales, Centre for Clinical Governance Research<br>Greenfield, David; University of New South Wales, Centre for Clinical Governance Research<br>Hogden, Anne; University of New South Wales, Centre for Clinical Governance Research<br>Debono, Deborah; University of New South Wales, Centre for Clinical Governance Research, Australian Institute of Health Innovation, Faculty of Medicine<br>Gospodarevskaya, Elena; University of New South Wales, Centre for Health Systems and Safety Research<br>Forde, Kevin; University of New South Wales, School of Public Health and Community Medicine<br>Westbrook, Johanna; University of New South Wales, Centre for Health Systems and Safety Research<br>Braithwaite, Jeffrey; Centre for Clinical Governance Research, University of New South Wales |
| <b>Primary Subject Heading</b>: | Health services research                                                                                                                                                                                                                                                                                                                                                                                                                                                                                                                                                                                                                                                                                                                                                                                                                             |
| Secondary Subject Heading:      | Health policy                                                                                                                                                                                                                                                                                                                                                                                                                                                                                                                                                                                                                                                                                                                                                                                                                                        |
| Keywords:                       | Clinical governance < HEALTH SERVICES ADMINISTRATION & MANAGEMENT, Quality in health care < HEALTH SERVICES ADMINISTRATION & MANAGEMENT, Infection control < INFECTIOUS DISEASES, Health policy < HEALTH SERVICES ADMINISTRATION & MANAGEMENT, Protocols & guidelines < HEALTH SERVICES ADMINISTRATION & MANAGEMENT, Organisational development < HEALTH SERVICES ADMINISTRATION & MANAGEMENT                                                                                                                                                                                                                                                                                                                                                                                                                                                        |
|                                 |                                                                                                                                                                                                                                                                                                                                                                                                                                                                                                                                                                                                                                                                                                                                                                                                                                                      |

SCHOLARONE™  
Manuscripts

## Disentangling quality and safety indicator data: a longitudinal, comparative study of hand hygiene compliance and accreditation outcomes in 96 Australian hospitals

### Authors:

|                                                                   |
|-------------------------------------------------------------------|
| <b>Virginia Mumford</b><br>Doctoral Candidate <sup>1</sup>        |
| <b>David Greenfield</b><br>Associate Professor <sup>1</sup>       |
| <b>Anne Hogden</b><br>Research Fellow <sup>1</sup>                |
| <b>Deborah Debono</b><br>Doctoral Candidate <sup>1</sup>          |
| <b>Elena Gospodarevskaya</b><br>Health Economist <sup>2</sup>     |
| <b>Kevin Forde</b><br>Senior Lecturer <sup>3</sup>                |
| <b>Johanna Westbrook</b><br>Professor and Director <sup>2</sup>   |
| <b>Jeffrey Braithwaite</b><br>Professor and Director <sup>1</sup> |

### Affiliations:

- 1) Centre for Clinical Governance Research, Australian Institute of Health Innovation, UNSW, Sydney, Australia
- 2) Centre for Health Systems and Safety Research, Australian Institute of Health Innovation, UNSW, Sydney, Australia
- 3) School of Public Health and Community Medicine, UNSW, Sydney, Australia

### Contact details of corresponding author:

|                                                                                                                      |
|----------------------------------------------------------------------------------------------------------------------|
| <b>Dr Virginia Mumford</b>                                                                                           |
| <b>Business:</b> + 612 9385 3281                                                                                     |
| <b>Fax:</b> + 612 9663 8692                                                                                          |
| <b>Mobile:</b> + 61458 303 988                                                                                       |
| <b>Email:</b> v.mumford@unsw.edu.au                                                                                  |
| <b>Address:</b> Australian Institute of Health Innovation<br>Faculty of Medicine UNSW<br>Sydney, NSW 2052, Australia |

### Keywords:

Accreditation; Healthcare associated infection;  
Hand hygiene; Performance indicators.

### Manuscript data:

**Words in abstract:** 280  
**Words in body:** 3567  
**Tables:** 2  
**Figures:** 2  
**References:** 48

## Disentangling quality and safety indicator data: a longitudinal, comparative study of hand hygiene compliance and accreditation outcomes in 96 Australian hospitals

### ABSTRACT

**Aim:** We compared hand hygiene compliance rates with accreditation scores over eight hand hygiene audit points and two accreditation cycles in order to test our hypothesis that hospitals with better accreditation outcomes would achieve higher hand hygiene compliance rates.

**Methods:** The study comprised a retrospective, longitudinal, multi-site comparative survey of hand hygiene compliance rates and accreditation outcomes in 96 acute public hospitals in New South Wales (NSW), Australia. We matched observational hand hygiene compliance data with accreditation survey results from 2009 to 2013. Hand hygiene compliance rates were assessed against the following explanatory variables: accreditation and infection control scores; timing of the surveys; and hospital size and activity. We used multilevel regression to analyse the data.

**Results:** Average hand hygiene compliance rates increased from 67.7% to 80.3% during the study period (2010 to 2013), with 46.7% of hospitals achieving target compliance rates of 70% in audit 1, versus 92.3% in audit 8. Average hand hygiene rates at small hospitals were 7.8 percentage points (pp) higher than those at the largest hospitals ( $p<0.05$ ). Hospitals with higher IC accreditation scores in one survey unexpectedly showed hand hygiene compliance rates that were 4.1 pp lower ( $p<0.05$ ) than hospitals with lower IC scores.

**Conclusions:** Our results indicate that accreditation outcomes and hand hygiene audit data are measuring different parts of the quality and safety spectrum. Our hypothesis appears confounded by an accreditation program that makes it more difficult for smaller hospitals to achieve high IC scores. Understanding what is being measured when selecting indicators is critical as focusing on accreditation results would discount successful hand hygiene implementation by smaller hospitals. Conversely, relying on hand hygiene results would discount the IC related research and leadership investment by larger hospitals.

**Strengths and limitations of this study:**

- The main strengths of this study lies in the number of participating acute hospitals (96) and length of follow up over eight audit points and two accreditation cycles.
- This study also addresses an important gap in terms of identifying or quantifying the benefits of hospital accreditation.
- The results have important implications for health policy makers internationally in terms of designing health service accreditation programs that can be accurately measured and monitored.
- The main limitation was the lack of a control group in order to assess direct or reverse causal relationships or to prevent omitted variable bias.
- Other limitations include measurement error resulting from using self-reported data, however the data collection methods adhere to World Health Organisation best practice guidelines.

## INTRODUCTION

Hospital accreditation programs are designed to set clinical and organisational standards, ensure compliance with those standards and strengthen quality improvement efforts. Accreditation is widely practised with national level accreditation agencies active in at least 27 countries.<sup>1</sup> The problems associated with measuring accreditation benefits are well documented.<sup>2,3</sup> A clear understanding of the inputs, in terms of costs and resource use, and outcomes, in terms of improved patient safety and quality, is essential in ensuring that accreditation programs are achieving their aims of improving patient safety and health care quality.<sup>4,5</sup> Measuring the effects of accreditation on clinical practice and quality of care is important as we need to determine whether the burden of data collection and audit processes are outweighed by the expected improvements in quality and safety outcomes.<sup>5</sup>

In this study we analyse the relationship between hand hygiene compliance rates and accreditation outcomes in order to test the suitability of hand hygiene as an indicator of accreditation outcomes. Our hypothesis is that hospitals with better accreditation outcomes and infection control (IC) scores than others, reflecting organisational processes in support of improvement and a positive culture toward quality and safety,<sup>6</sup> would achieve higher hand hygiene compliance rates.

Hand hygiene assessment is an integral component of the IC standards used to evaluate whether Australian hospitals are compliant with the accreditation standards.<sup>7-9</sup> Hand hygiene compliance rates have been validated as a potential process indicator for accreditation outcomes. Health care associated infections (HAIs) are recognised as a leading cause of increased morbidity and health care costs.<sup>10</sup> A United States (US) study estimated there were 1.7 million HAIs in 2002, comprising 4.5% of admissions, and resulting in nearly 99,000 deaths.<sup>11</sup> A recent meta-analysis estimated the cost of the five most common HAIs at US\$9.8 billion per annum.<sup>12</sup> In Australia, the most recent figures available indicate that HAIs resulted in an extra two million bed days in 2005, with estimated additional costs of AU\$21 million from post-discharge surgical infections.<sup>13</sup>

There is increasing evidence that improving hand hygiene reduces HAIs and the spread of anti-microbial resistance.<sup>14-18</sup> However, it is difficult to demonstrate a causal link between hand hygiene and HAIs due to a multiplicity of interventions and scarcity of randomised trials.<sup>19-21</sup> Nevertheless, the World Health Organization (WHO) has identified good hand hygiene as a major factor in reducing HAIs based on epidemiological evidence.<sup>18</sup>

Hand hygiene policies in Australian hospitals follow international best practices. They are based on WHO recommendations with a multimodal approach incorporating: access to cleaning agents at the point of care; training and education; monitoring and feedback; reminders in the workplace; and development of an institutional safety climate.<sup>22</sup> Auditors trained by Hand Hygiene Australia (HHA) monitor hand hygiene activity by direct observation of hospital staff and compare hand hygiene activity against the total number of potential “moments” for hand hygiene.<sup>23</sup> The national target for hand hygiene compliance is 70% and audit results are publicly reported three times a year. The Australian Commission on Safety and Quality in Health Care

(ACSQHC) has recommended that hand hygiene programs need to be repeatedly monitored using both process indicators (compliance rates) and outcome indicators (infection rates).<sup>24</sup>

## METHODS

### Study design, setting and context

The study comprised a retrospective, longitudinal, multi-site comparative survey of hand hygiene compliance rates and accreditation outcomes in acute public hospitals in New South Wales (NSW), Australia. With a population of 7.2 million, NSW comprises 30.5% of the 736 public hospitals and 32.0% of the population in Australia.<sup>25</sup> We employed retrospective data matching techniques over the study period, 2009 to 2013 to analyse the relationship between hand hygiene compliance data and accreditation outcomes.

### Data matching and analysis

#### a) Hand hygiene compliance data

Hand hygiene policies include five “moments” when hand hygiene should be performed: before touching a patient; before a procedure; after a procedure or body fluid exposure risk; after touching a patient; and after touching a patient’s surroundings.<sup>23 26</sup> Audits are carried out three times a year by health care workers who have been accredited by HHA. Surveys are conducted using a standardised observation assessment tool which measures hand hygiene activity versus the total number of observed possible “moments”. Auditors are trained in selecting the wards or units for the audit, and the minimum number of required “moments” for each audit is determined by hospital size and activity. We obtained the hand hygiene compliance rates data from late 2010 to early 2013 from the NSW Clinical Excellence Commission (CEC), the quality and safety body responsible for implementing the hand hygiene initiative in NSW and collecting hand hygiene audit data.<sup>27</sup>

#### b) Accreditation program and infection control standards

Data on accreditation outcomes from 2009 to 2013 were provided by the Australian Council on Healthcare Standards (ACHS). The ACHS Evaluation and Quality Improvement Program (EQuIP) was introduced in 1997 and comprises a four year cycle with surveys in years two and four.<sup>28</sup> During these surveys, hospitals are assessed by an external team of surveyors against ACHS developed standards. The EQuIP program has undergone several revisions, none of which materially affected this study. Our study period included EQuIP4 which was introduced in 2007 and used for the surveys in 2009 and 2010, and EQuIP5 which was introduced in 2011. Facilities were scored by surveyors on a five point Likert scale for each standard or criterion assessed in the survey. Scores were designated as Outstanding Achievement (OA), Extensive Achievement (EA), Moderate Achievement (MA), Some Achievement, and Little Achievement. Hospitals needed to achieve MA, EA or OA scores in each mandatory standard or criterion in order to meet accreditation requirements.

IC related criteria were part of a broader standard regarding the safe provision of care and services.<sup>7 8</sup> To meet MA requirements, hospitals needed to ensure that the IC policy: met all regulatory requirements and industry

1  
2  
3 guidelines; had executive support; incorporated ongoing education activities; and included indicators to show  
4 both compliance with policy and effective outcome measurement. Additional activities which counted  
5 towards achieving higher (EA and OA) scores included: benchmarking of performance indicators; use of  
6 feedback to inform and improve; IC research; and recognised leadership in IC systems.<sup>7 8</sup> Accreditation is often  
7 granted to a cluster of facilities within a local health district and therefore reflects conditions at all the  
8 facilities within that survey group. These clusters are subject to boundary changes, as seen in the NSW 2011  
9 health system re-organisation, which took place during the study period (2009-2012).<sup>29</sup> We therefore  
10 identified the different hospitals within each cluster in order to match the accreditation scores with the hand  
11 hygiene data from individual hospitals.  
12  
13  
14  
15

### 16 17 **Study Variables**

18  
19 To analyse the matched data we used hand hygiene compliance rates as our outcome of interest, expressed as  
20 a continuous outcome variable (*hh*). Data were available at eight different time points from the end of 2010 to  
21 early 2013 (see Figure 1). We created dummy variables for the IC standard to designate whether they  
22 achieved a high IC score in the first or second survey in each cycle (*hai1* and *hai2* respectively). No hospitals  
23 scored less than MA during the study period so we differentiated the outcomes by assigning MA as 0, and the  
24 higher scores (EA, and OA) as 1. We created a categorical variable for the number of surveys where each  
25 hospital achieved high IC scores (*hait*). There were three possible outcomes: no high scores in either survey  
26 (*hait=0*); high scores in one survey (*hait=1*); or high scores in both surveys (*hait=2*). The dummy variable for  
27 accreditation (*acct*) was designated 1 for full accreditation, and 0 for partial accreditation. We defined partial  
28 accreditation as either accreditation being granted for a reduced time, or resulting in a recommendation for  
29 action. No hospitals in the study were refused accreditation during the study period. We assigned a *cycle*  
30 variable to identify whether surveys were either carried out in the 2009 and 2011 (*cycle=0*), or 2010 and 2012  
31 (*cycle=1*).  
32  
33  
34  
35  
36  
37  
38

### 39 **Figure 1: Timeline of accreditation surveys and hand hygiene audits**

40  
41 <Insert Figure 1 here>  
42  
43

44 Acute hospitals were grouped according to the Australian Institute of Health and Welfare activity matrix,  
45 based on annual numbers of acute case-mix adjusted separations and geographic location.<sup>30</sup> We used these  
46 groups to create a categorical variable (*grp*) with principal referral and specialist hospitals as the reference  
47 case (*principal=0*), with large hospitals scored as 1, medium hospitals as 2, and small hospitals as 3.  
48  
49

### 50 **Analysis**

51  
52 The nature of the data with irregular audit dates and clustering within hospitals indicated that a multi-level  
53 model would be the most appropriate and would allow adjustment for hospital level variance.<sup>31 32</sup> Our model  
54 used audit points as Level-1 units and hospitals as Level-2 units. After matching the accreditation and hand  
55 hygiene data our sample comprised 96 hospitals each with two accreditation surveys. We tested our main  
56  
57  
58  
59  
60

1  
2  
3 model (comprising the *hh*, *hait*, *acct*, *grp* and *cycle* variables), and fitted a restrictive model using audits 3 to 8.  
4 We looked for timing effects by fitting survey models for each survey and cycle (using *the hh*, *hai1* or *hai2*,  
5 *cycle*= 0 or 1, and *grp* variables). We tested the model fit versus ordinary least squares by calculating the intra-  
6 class correlation to assess the within-hospital effect. We also tested whether to use a random co-efficient or  
7 random intercept model. Analysis was conducted using Stata statistical software (version 12SE),<sup>33</sup> applying a  
8 two-sided significance level of 5%.

## 12 RESULTS

### 15 Hand hygiene and accreditation data analysis

17 We assessed hand hygiene data on 118 hospitals from eight different audit points during 2010 to 2013.  
18 Missing data were higher during the first two audits whilst the program was progressively implemented, and  
19 for some hospitals we were not able to match the accreditation outcomes because of changes in the  
20 accreditation clusters. We did not impute values for missing data as the pattern of missing results indicated  
21 these were not missing at random. For example, data some of the smaller hospitals were not included as they  
22 did not meet the minimum publication requirements (50 moments of hand hygiene), which we determined  
23 was likely to be related to hospital size.

28 Overall, hand hygiene rates showed an improvement during the study period, with 28 out of 60 hospitals  
29 (46.7%) achieving 70% compliance rates in the first audit in 2010 versus 108 out of 117 hospitals (92.3%) in  
30 the final audit, in early 2013. Average hand hygiene compliance rates increased from 67.7% in audit 1, to  
31 80.3% in audit 8, and remained above the 70% national target rate from audit 2 onwards. The average audit  
32 compliance rates with minimum and maximum values, and standard deviations, are shown in Figure 2.

#### 36 Figure 2: Hand hygiene compliance audits, 2010-2013

38 <Insert Figure 2 here>

41 During the study period, 2009-2013, 61 hospitals underwent an accreditation survey in cycle 0, and 44 in cycle  
42 1. The accreditation outcomes showed that 59% of organisations were granted full accreditation in the first  
43 survey in each cycle (during 2009-10) versus 77% in the second survey (2011-12). The number of hospitals  
44 receiving a high IC scores increased over time, with 13% receiving a high score (EA) in the first survey of each  
45 accreditation cycle versus 18% in the second surveys during 2011 and 2012. No hospitals received an OA score  
46 for infection control during the study period. We further examined whether there was a difference between  
47 meeting, or not meeting, the target compliance rates by comparing the partial data from audit 1 when the  
48 program was being rolled out, and the final audit in our study, audit 8 (Table 1). This showed that the large  
49 hospitals showed the biggest increase, with 30% meeting the target in audit 1, rising to 100% by audit 8.  
50 Principal and large hospitals comprised 51.7% of hospitals in audit 1 versus 39.3% in audit 8, suggesting they  
51 were early adopters in the program.

#### 58 Table 1: Comparison of whether hospitals met national hand hygiene targets in audits 1 and 8



| Hospital groups | Audit 1 |     |       | Audit 8 |     |       |
|-----------------|---------|-----|-------|---------|-----|-------|
|                 | Not met | Met | % Met | Not met | Met | % Met |
| Principal       | 13      | 8   | 38.1  | 2       | 28  | 93.3  |
| Large           | 7       | 3   | 30.0  | 0       | 16  | 100.0 |
| Medium          | 4       | 6   | 60.0  | 3       | 26  | 89.7  |
| Small           | 8       | 11  | 57.9  | 4       | 38  | 90.5  |

The accreditation and IC outcomes improved over time with full accreditation for both surveys being awarded to 30% of hospitals in cycle 0 versus 42% in cycle 1. IC scores showed a similar pattern with 3% of organisations receiving high scores in both surveys in cycle 0 versus 17% in cycle 1. A size effect was noted with 6.9% (n=2) of smaller hospitals receiving a higher infection control score in at least one survey versus 37.0% (n=10) of principal and 42.9% (n=6) of large hospitals.

#### Multilevel model

After matching the hand hygiene data with hospitals that underwent two accreditation surveys, our main model included data from 661 hand hygiene audits from 96 hospitals, an average of 6.9 audits per hospital. The results (Table 2) show that small and medium sized hospitals experienced significantly higher hand hygiene compliance rates (7.8 percentage points (pp) for small hospitals and 3.8 pp for medium hospitals) compared to principal hospitals. The association between hand hygiene rates and accreditation outcomes, for both overall and IC scores, is less clear. Hospitals achieving high IC scores (EA) in one survey (n=14) showed 4.1 pp lower hand hygiene rates than hospitals achieving an MA score, and this result was significant (p=0.038). Hospitals achieving high IC scores in both surveys (n=8) showed higher rates (2.1 pp) but this was not significant (p=0.39). Achieving full accreditation for both surveys was not significantly associated with hand hygiene rates versus those hospitals which achieved full accreditation in only one survey. The restricted model, using data from audit 3 onwards, also showed a negative relationship between high IC scores and hand hygiene audit results, however, the effect was smaller (2.8 pp) and the results were no longer significant (p=0.15). The size effect in the restricted model was consistent, with small and medium hospitals showing significantly higher hand hygiene rates.

**Table 2: Results of our multilevel model**

| Variables | Main model | Restricted model | Survey models |              |
|-----------|------------|------------------|---------------|--------------|
|           | Audits 1-8 | Audits 3-8       | First Cycle   | Second Cycle |
|           |            |                  |               |              |

|                                                             | Mean           | SE <sup>1</sup> | Mean          | SE    | Mean   | SE    | Mean   | SE    |
|-------------------------------------------------------------|----------------|-----------------|---------------|-------|--------|-------|--------|-------|
| Higher (OA or EA) score for infection control in one survey | <b>-0.041*</b> | 0.020           | -0.028        | 0.02  |        |       |        |       |
| Higher scores for infection control in both surveys         | 0.021          | 0.025           | 0.034         | 0.024 |        |       |        |       |
| Higher infection control scores in first survey             |                |                 |               |       | -0.043 | 0.031 | 0.01   | 0.028 |
| Higher infection control scores in second survey            |                |                 |               |       | 0.045  | 0.027 | -0.007 | 0.022 |
| Full accreditation on both surveys                          | 0.003          | 0.016           | 0.007         | 0.016 |        |       |        |       |
| Cycle (2009/11= 0)                                          | 0.022          | 0.014           | 0.018         | 0.013 |        |       |        |       |
| Hospital group (Principal referral=0)                       |                |                 |               |       |        |       |        |       |
| Large                                                       | 0.022          | 0.02            | 0.024         | 0.02  |        |       |        |       |
| Medium                                                      | <b>0.038*</b>  | 0.018           | <b>0.039*</b> | 0.017 |        |       |        |       |
| Small                                                       | <b>0.078*</b>  | 0.019           | <b>0.081*</b> | 0.018 |        |       |        |       |
| Number of observations                                      | 661            |                 | 563           |       | 420    |       | 282    |       |
| Number of hospitals                                         | 96             |                 | 96            |       | 60     |       | 42     |       |
| Average compliance rate                                     | 0.74           |                 | 0.75          |       | 0.75   |       | 0.75   |       |
| Log likelihood                                              | 661.85         |                 | 633.77        |       | 401.43 |       | 252.52 |       |

<sup>1</sup> Standard error, \* Indicates significance at 5% (p<0.05)

Given the greater change in hand hygiene rates during the early audits, we reviewed the data for timing effects by examining the results by survey and cycle. The majority of the first surveys in both cycles were completed before the hand hygiene audits started. The survey models showed that in cycle 0, higher IC scores were associated with lower hand hygiene results (-4.3 pp) in the first survey, versus a positive relationship in the second survey (+4.5 pp), however these were not significant (p=0.17 and 0.102 respectively) and were reversed in the second cycle.

### Testing the model

The intra-class correlation co-efficient indicated that 38% of the variance was due to within-hospital effects, indicating sufficient variance for using a random intercept model.<sup>32</sup> We ran a likelihood ratio test using a null model (without the random intercept). This gave a chi-squared test result of 190 (p=0.000), which confirmed our approach versus using ordinary least squares. We also tested the model using IC scores as a random co-

1  
2  
3 efficient but the results (chi squared= 0.81, p=0.67) indicated that the random intercept model was more  
4 appropriate. We noted a ceiling effect in our data with 100% of large hospitals and 92% of all hospitals  
5 meeting the target compliance rates by audit 8, with less incentive to reach higher levels. Although hospitals  
6 were incrementally enrolled in the hand hygiene program the lack of hand hygiene compliance data in the un-  
7 enrolled hospitals meant we were not able to use a stepped wedge design to provide controls or evaluate a  
8 before and after effect and our results are subject to omitted variable bias. A fixed effects panel data model  
9 might be a more traditional approach to reduce sample variation, but we determined that the random  
10 intercept model would be more appropriate due to the policy requirement for all public hospitals to submit  
11 hand hygiene data, and the presence of time-invariant variables.<sup>34</sup>

## 12 DISCUSSION

13  
14  
15 Our analysis of 118 NSW hospitals showed that hand hygiene rates increased from 67.7% in audit 1 in late  
16 2010 to 80.3% by audit 8 in early 2013. This compares to rates of 62.2% from a sample of NSW hospitals in  
17 February 2007 which were observed following the introduction of the Clean Hand Saves Lives campaign during  
18 2006-2007,<sup>15</sup> and continues the improvement shown nationally in Australia with average hand hygiene rates  
19 estimated at 68.3% in 2011.<sup>35</sup> These results can be compared to average hand hygiene rates of 56.6% in 40 US  
20 hospitals following the introduction of national hand hygiene guidelines in 2002.<sup>36</sup>

21  
22  
23  
24  
25  
26  
27  
28  
29 Smaller hospitals in our study had higher hand hygiene compliance rates but the relationship between  
30 accreditation outcome and hand hygiene data was less clear. This effect of hospital size on hand hygiene  
31 compliance has received confirmation by other research investigating the link between hand hygiene rates  
32 and health care associated *Staphylococcus aureas* bacteraemia (SAB).<sup>37 38</sup> We consider the results from small  
33 and medium hospitals in our study can be explained by looking at the organisational infrastructure necessary  
34 to meet the hand hygiene and accreditation requirements. Both are dependent on a widespread  
35 organisational response in terms of education, monitoring, infrastructure and management involvement.<sup>6</sup>  
36 Achieving high IC scores requires additional benchmarking, feedback and research capabilities.<sup>7 8</sup> The  
37 organisational size effect suggests that small and medium sized hospitals can effectively embrace multimodal  
38 quality improvement strategies as seen by the higher compliance rates. However, the requirements for  
39 achieving high IC scores within an accreditation survey may be measuring different aspects of quality that are  
40 not reflected in the hand hygiene compliance rates. The results indicate that smaller hospitals are able to  
41 focus on the practical implementation of a national hand hygiene policy. Having the resources to meet the  
42 requirements for higher IC scores, in terms of conducting research or being recognised leaders in infection  
43 control, is not practical for these smaller organisations. Although some smaller hospitals will be accredited as  
44 part of a larger cluster of hospitals, which includes principal and large hospitals, this is not always the case.  
45 Our hypothesis that higher accreditation scores would be reflected in hand hygiene rates appears to be  
46 confounded by an accreditation program that makes it more difficult for smaller hospitals to achieve high IC  
47 scores.  
48  
49  
50  
51  
52  
53  
54  
55  
56  
57  
58  
59  
60

1  
2  
3 This study uses one indicator for evaluating accreditation whereas multiple measures may be more effective.<sup>39</sup>  
4 For example, outcome indicators are widely used in the US hospital system,<sup>40-42</sup> and include hospital acquired  
5 SAB rates and surgical site infection rates. These incorporate a broader mix of the anti-microbial, hand  
6 hygiene, and specialist cleaning practice modules of the IC standard. Using outcome indicators would  
7 complete Donabedian's triad of performance measures to include structural (accreditation results), process  
8 (hand hygiene compliance rates) and outcome (SAB rates) measures.<sup>43 44</sup>  
9  
10  
11

12 Measurement issues in our study include a possible observer effect since the hospital staff might be aware the  
13 audit was taking place. However, although this may increase the compliance rate, the results would still be  
14 valid as the standards include requirements for staff education and installation of appropriate infrastructure.  
15 Increased rates during an audit imply that the correct infrastructure is in place, in terms of availability of  
16 functioning hand washing stations, and that staff are aware of the hand hygiene policies. In addition, any  
17 observer effect is likely to be mitigated as all the hospitals used the same methods for collecting data and thus  
18 are equally subjected to bias. Other methods to measure hand hygiene activity include measuring  
19 consumption rates of hand hygiene products, such as alcohol rubs,<sup>45</sup> and electronic systems for monitoring  
20 compliance,<sup>46</sup> but WHO guidelines suggest direct observation is still the gold standard.<sup>40</sup> We also note that  
21 although accreditation surveys are assessed on a five point scale, only two scores (MA and EA) were used in  
22 the infection control standard during the four surveys in our study. The lack of granularity in the accreditation  
23 scores makes it difficult to differentiate accreditation performance. Limitations of the model include reverse  
24 causality in that higher compliance rates could lead to higher IC scores at the next survey. This would likely be  
25 the case going forward as ACSQHC includes hand hygiene audit results as part of the evidence of  
26 implementation of standard 3 under new national standards.<sup>9 47</sup>  
27  
28  
29  
30  
31  
32  
33  
34  
35

### 36 **Policy Implications**

37 Different indicators will give different perspectives on how an organisation approaches and implements  
38 relevant policy. However, the costs of measurement in health care should be balanced against using a range of  
39 indicators to capture a broader mix of IC policies, and across the different standards assessed during  
40 accreditation surveys. Indicator selection should include both process indicators, recognised as a method of  
41 measuring organisational changes,<sup>48</sup> and outcome indicators. Public reporting of indicator data further  
42 increases the requirement to accurately identify and measure the parts of the patient safety and quality  
43 spectrum that are being addressed. In this study, a focus on the accreditation results would discount the  
44 successful implementation of the hand hygiene policy by smaller hospitals. Conversely, just using hand  
45 hygiene results would discount the research and leadership investment in infection control by larger hospitals.  
46 Disentangling these two outcomes within the same safety and quality initiative is a pre-requisite to  
47 understanding how they can be effectively assessed and monitored.  
48  
49  
50  
51  
52  
53  
54

### 55 **CONCLUSION**

1  
2  
3 Identifying indicators to measure the effectiveness of accreditation is challenging due to the complexity of  
4 implementing a wide range of accreditation related processes across multiple hospital activities. These results  
5 do not lend support to our study hypothesis that higher IC scores are associated with higher hand hygiene  
6 rates. Instead, this study suggests that accreditation outcomes and hand hygiene audit data are  
7 complementary. Developing a framework to identify suitable indicators is an important contribution to  
8 understanding the impact of hospital accreditation internationally. Policy makers need to appreciate the  
9 assumptions behind the choice of indicator and understand exactly what is being measured to ensure that key  
10 performance indicators encourage quality improvements in the delivery of hospital services.  
11  
12  
13  
14  
15  
16  
17  
18  
19  
20  
21  
22  
23  
24  
25  
26  
27  
28  
29  
30  
31  
32  
33  
34  
35  
36  
37  
38  
39  
40  
41  
42  
43  
44  
45  
46  
47  
48  
49  
50  
51  
52  
53  
54  
55  
56  
57  
58  
59  
60

**ACKNOWLEDGMENTS, COMPETING INTERESTS, and FUNDING**

**Acknowledgements :** This study forms part of the Accreditation Collaborative for the Conduct of Research, Evaluation and Designated Investigations through Teamwork (ACCREDIT) project. The ACCREDIT collaboration involves researchers in the Centre for Clinical Governance Research and Centre for Health Systems and Safety Research in the Australian Institute of Health Innovation at the University of New South Wales, Australia. The ACCREDIT research team benefits from a high-profile international advisory group containing researchers in health safety and quality from the United Kingdom, Spain and Sweden. The collaboration includes two leading health safety and quality bodies (ACSQHC and CEC) plus three of the major Australian health services accreditation agencies: ACHS, Australian General Practice Accreditation Limited (AGPAL), and the Australian Aged Care Quality Agency (AACQA). The authors would like to thank ACHS and the NSW CEC for providing data for the study. The authors would also like to acknowledge the help and encouragement received from the PhD group at the Centre for Health Economics Research and Evaluation at the University of Technology Sydney, in particular: Prof. Marion Haas; Dr. Rebecca Reeve; and Ms. Bonny Parkinson.

**Competing interests:** None declared

**Funding:** This research is supported by the National Health and Medical Research Council Program Grant 568612, and under the Australian Research Council's Linkage Projects scheme (project LP100200586). Industry partners (ACHS, AGPAL, and AACQA) contributed to the project design and may provide assistance with its implementation. They may also contribute to data analysis, interpretation of findings and presentation of results, but have no role in the design and conduct of the study. Final decision making responsibility for all research activities, including the decision to submit research for publication, resides with UNSW.

**Ethics:** Human Research Ethics Committee approval for this study was granted by UNSW (approval number HREC 10274).

**Contributorship:** JB, DG, JW and VM contributed to the concept and design of the study. VM, JB and DG contributed to the acquisition of the data. VM wrote the draft of the manuscript. JB and DG provided a critical revision of the manuscript. VM and EG performed the data analysis, JB, EG, KF, AH, DD, and JW provided expert advice and reviewed the manuscript.

**Data sharing:** Data available on request from the corresponding author.

**Ethics:** The University of New South Wales Human Research Ethics Committee has approved this project (approval number HREC 10274).

The University of New South Wales Human Research Ethics Committee has approved this project (approval number HREC 10274).

## REFERENCES

1. Shaw CD, Braithwaite J, Moldovan M, *et al.* Profiling health-care accreditation organizations: an international survey. *International Journal for Quality in Health Care* 2013;25(3).
2. Mumford V, Forde K, Greenfield D, *et al.* Health services accreditation: what is the evidence that the benefits justify the costs? *International Journal for Quality in Health Care* 2013;25(5):66-62.
3. Groene O, Botje D, Suñol R, *et al.* A systematic review of instruments that assess the implementation of hospital quality management systems. *International Journal for Quality in Health Care* 2013;25(5):525-41.
4. Australian Commission on Safety and Quality in Health Care. *Australian Safety and Quality Framework for Health Care, Putting the Framework into action: getting started.* Sydney: ACSQHC, 2011.
5. van Harten WH, Casparie TF, Fisscher OAM. Methodological considerations on the assessment of the implementation of quality management systems. *Health Policy* 2000;54(3):187-200.
6. Braithwaite J, Greenfield D, Westbrook J, *et al.* Health service accreditation as a predictor of clinical and organisational performance: a blinded, random, stratified study. *Quality & Safety in Health Care* 2010;19(1):14-21.
7. Australian Council on Healthcare Standards. *The ACHS EQUIP 4 guide: part 2 – standards.* Ultimo: ACHS, 2007.
8. Australian Council on Healthcare Standards (ACHS). *EQUIP5 standards and criteria.* Ultimo: ACHS, 2010.
9. Australian Commission on Safety and Quality in Health Care (ACSQHC). *National safety and quality health service standards.* Sydney: ACSQHC, 2012.
10. Productivity Commission. *Public and private hospitals: research report.* Canberra: Productivity Commission, 2009.
11. Klevens RM, Edwards JR, Richards C, *et al.* Estimating health care-associated infections and deaths in U.S. hospitals (2002). *Public Health Reports* 2007;122(2):160-66.
12. Zimlichman E, Henderson D, Tamir O, *et al.* Health care-associated infections: a meta-analysis of costs and financial impact on the US health care system. *JAMA Internal Medicine* 2013;173(22):2039-46.
13. Graves N, Weinhold D, Tong E, *et al.* Effect of healthcare-acquired infection on length of hospital stay and cost. *Infection Control and Hospital Epidemiology* 2007;28(3):280-92.
14. Pittet D, Allegranzi B, Sax H, *et al.* Evidence-based model for hand transmission during patient care and the role of improved practices. *The Lancet Infectious Diseases* 2006;6(10):641-52.
15. Grayson ML, Jarvie LJ, Martin R, *et al.* Significant reductions in methicillin-resistant *Staphylococcus aureus* bacteraemia and clinical isolates associated with a multisite, hand hygiene culture-change program and subsequent successful statewide roll-out. *Medical Journal of Australia* 2008;188(11):633-40.
16. Pincock T, Bernstein P, Warthman S, *et al.* Bundling hand hygiene interventions and measurement to decrease health care-associated infections. *American Journal of Infection Control* 2012;40(4 SUPPL.):S18-S27.
17. Johnson P, Martin R, Burrell LJ, *et al.* Efficacy of an alcohol/chlorhexidine hand hygiene program in a hospital with high rates of nosocomial methicillin-resistant *Staphylococcus aureus* (MRSA) infection. *Medical Journal of Australia* 2005;183 (10):509-14.

- 1
- 2
- 3 18. World Health Organization. *WHO guidelines on hand hygiene in health care: a summary. First global*
- 4 *patient safety challenge - clean care is safer care.* Geneva, Switzerland: World Health Organisation, 2009.
- 5
- 6 19. Gould DJ, Moralejo D, Drey N, *et al.* Interventions to improve hand hygiene compliance in patient care.
- 7 *Cochrane Database of Systematic Reviews (Online)* 2010(9).
- 8
- 9 20. Backman C, Zoutman DE, Marck PB. An integrative review of the current evidence on the relationship
- 10 between hand hygiene interventions and the incidence of health care-associated infections. *American*
- 11 *Journal of Infection Control* 2008;36(5):333-48.
- 12
- 13 21. ACSQHC. *Surveillance of Healthcare Associated Infections: Staphylococcus aureus bacteraemia &*
- 14 *Clostridium difficile infection - Version 4.0.* Sydney: Australian Commission for Safety and Quality in Health
- 15 Care, 2012.
- 16
- 17 22. World Health Organization. *A guide to the implementation of the WHO multimodal hand hygiene*
- 18 *improvement strategy.* Geneva: WHO, 2009.
- 19
- 20 23. Hand Hygiene Australia. *Hand Hygiene Australia manual: 5 moments for hand hygiene. 3rd Edition.*
- 21 Heidelberg, VIC: Commonwealth of Australia, 2013.
- 22
- 23 24. Grayson L, Hunt C, Johnson P, *et al.* Hand hygiene. In: Cruickshank M, Ferguson J, editors. *Reducing harm*
- 24 *to patients from health care associated infection: the role of surveillance.* Sydney: Australian Commission
- 25 for Safety and Quality in Health Care, 2008.
- 26
- 27 25. Australian Institute of Health and Welfare. *Australian hospital statistics 2011–12. Health services series no.*
- 28 *50. Cat. no. HSE 134.* Canberra: AIHW, 2013.
- 29
- 30 26. ACSQHC. *Australian guidelines for the prevention and control of infection in healthcare.* Canberra:
- 31 Australian Government, NHMRC & the Australian Commission on Safety and Quality in Healthcare, 2010.
- 32
- 33 27. Clinical Excellence Commission. *Clinical Excellence Commission Strategic Plan 2012 - 2015.* Sydney: CEC,
- 34 2012.
- 35
- 36 28. Australian Council on Healthcare Standards. *National report on health services accreditation performance*
- 37 *2003-2006.* Ultimo: ACHS, 2007.
- 38
- 39 29. Commonwealth of Australia. *National health reform: progress and delivery.* Canberra: Department of
- 40 Health and Ageing, 2011.
- 41
- 42 30. Independent Hospital Pricing Authority. *National hospital cost data collection, Australian public hospitals*
- 43 *cost report 2010-2011, round 15,.* Sydney: IHPA, 2013.
- 44
- 45 31. Garson D. Fundamentals of hierarchical linear and multilevel modeling. In: Garson D, editor. *Hierarchical*
- 46 *linear modeling: guide and applications:* Sage Publications Inc., 2013:3-25.
- 47
- 48 32. Rabe-Hesketh S, Skrondal A. *Multilevel and longitudinal modelling using stata.* 3rd ed. College Station:
- 49 Stata Press, 2012.
- 50
- 51 33. Stata Statistical Software: Release 12 [SE]. College Station, TX: StataCorp LP. 2011.
- 52
- 53 34. Allison PD. Using panel data to estimate the effects of events. *Sociological Methods & Research*
- 54 *1994;23(2):174-99.*
- 55
- 56 35. Grayson ML, Russo PL, Cruickshank M, *et al.* Outcomes from the first 2 years of the Australian National
- 57 Hand Hygiene Initiative. *Med J Aust* 2011;195(10):615-19.
- 58
- 59
- 60



- 1  
2  
3 36. Larson EL, Quiros D, Lin SX. Dissemination of the CDC's Hand Hygiene Guideline and impact on infection  
4 rates. *American Journal of Infection Control* 2007;35:666-75.
- 5  
6 37. Playford EG, McDougall D, McLaws M-L. Problematic linkage of publicly disclosed hand hygiene compliance  
7 and health care-associated Staphylococcus aureus bacteraemia rates. *Medical Journal of Australia*  
8 2012;197(1): 29 - 30.
- 9  
10 38. Australian Commission on Safety and Quality in Health Care. *National core, hospital-based outcome*  
11 *indicator specification, Version 1.1 - CONSULTATION DRAFT*. Sydney: ACSQHC, 2012.
- 12  
13 39. Brown C, Hofer T, Johal A, *et al*. An epistemology of patient safety research: a framework for study design  
14 and interpretation. Part 1. Conceptualising and developing interventions. *Quality and Safety in Health Care*  
15 2008;17(3):158-62.
- 16  
17 40. The World Health Organization. *Automated/electronic systems for hand hygiene monitoring: a systematic*  
18 *review* Geneva, Switzerland: WHO, 2013.
- 19  
20 41. The Joint Commission. *Improving America's hospitals: The Joint Commission's annual report on quality and*  
21 *safety*. Oakbrook Terrace, IL: TJC, 2013.
- 22  
23 42. Agency for Healthcare Research and Quality. *ARHQ quality indicators toolkit for hospitals: how to improve*  
24 *hospital quality and safety*. Rockville: AHRQ, 2012.
- 25  
26 43. Donabedian A. The Quality of Care: How Can It Be Assessed? *JAMA Internal Medicine* 1988;260(12):1743-  
27 48.
- 28  
29 44. Mountford J, Shojania KG. Refocusing quality measurement to best support quality improvement: local  
30 ownership of quality measurement by clinicians. *BMJ Quality & Safety* 2012;21(6):519-23.
- 31  
32 45. Behnke M, Gastmeier P, Geffers C, *et al*. Establishment of a national surveillance system for alcohol-based  
33 hand rub consumption and change in consumption over 4 years. *Infection Control and Hospital*  
34 *Epidemiology* 212;33(6):618-62.
- 35  
36 46. Boyce JM. Measuring healthcare worker hand hygiene activity: current practices and emerging  
37 technologies. *Infection Control and Hospital Epidemiology* 2011;32(10):1016-28.
- 38  
39 47. Australian Commission on Safety and Quality in Health Care. *Safety and quality improvement guide,*  
40 *Standard 3: Preventing and controlling healthcare associated infections*. Sydney: ACSQHC, 2012.
- 41  
42 48. Mant J. Process versus outcome indicators in the assessment of quality of health care. *International*  
43 *Journal for Quality in Health Care* 2001;13(6):475-80.
- 44  
45  
46  
47  
48  
49  
50  
51  
52  
53  
54  
55  
56  
57  
58  
59  
60

1  
2  
3  
4  
5  
6  
7  
8  
9  
10  
11  
12  
13  
14  
15  
16  
17  
18  
19  
20  
21  
22  
23  
24  
25  
26  
27  
28  
29  
30  
31  
32  
33  
34  
35  
36  
37  
38  
39  
40  
41  
42  
43  
44  
45  
46  
47  
48  
49  
50  
51  
52  
53  
54  
55  
56  
57  
58  
59  
60

**Accreditation surveys**

Survey 1    Survey 1    Survey 2    Survey 2  
Cycle 0    Cycle 1    Cycle 0    Cycle 1

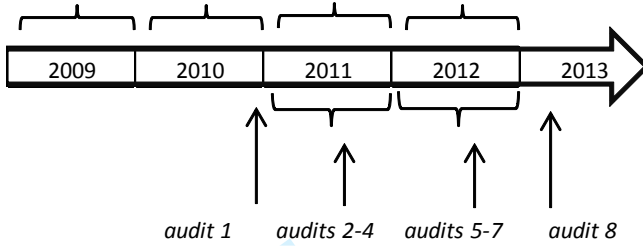

**Hand hygiene audits**

For peer review only

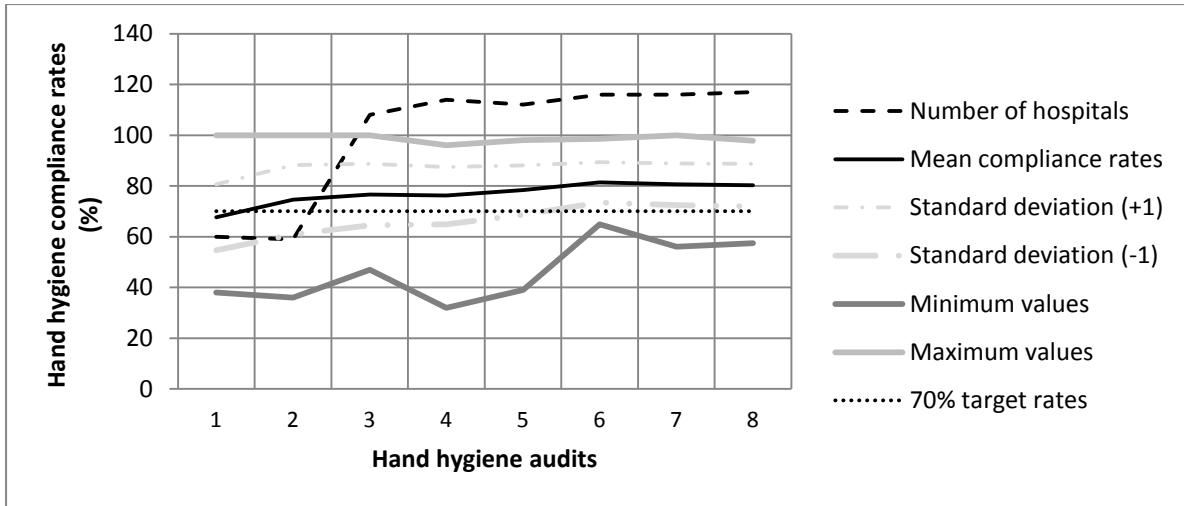

For peer review only

1  
2  
3  
4  
5  
6  
7  
8  
9  
10  
11  
12  
13  
14  
15  
16  
17  
18  
19  
20  
21  
22  
23  
24  
25  
26  
27  
28  
29  
30  
31  
32  
33  
34  
35  
36  
37  
38  
39  
40  
41  
42  
43  
44  
45  
46  
47  
48  
49  
50  
51  
52  
53  
54  
55  
56  
57  
58  
59  
60

# BMJ Open

## Disentangling quality and safety indicator data: a longitudinal, comparative study of hand hygiene compliance and accreditation outcomes in 96 Australian hospitals

|                                 |                                                                                                                                                                                                                                                                                                                                                                                                                                                                                                                                                                                                                                                                                                                                                                                                                                                      |
|---------------------------------|------------------------------------------------------------------------------------------------------------------------------------------------------------------------------------------------------------------------------------------------------------------------------------------------------------------------------------------------------------------------------------------------------------------------------------------------------------------------------------------------------------------------------------------------------------------------------------------------------------------------------------------------------------------------------------------------------------------------------------------------------------------------------------------------------------------------------------------------------|
| Journal:                        | <i>BMJ Open</i>                                                                                                                                                                                                                                                                                                                                                                                                                                                                                                                                                                                                                                                                                                                                                                                                                                      |
| Manuscript ID:                  | bmjopen-2014-005284.R1                                                                                                                                                                                                                                                                                                                                                                                                                                                                                                                                                                                                                                                                                                                                                                                                                               |
| Article Type:                   | Research                                                                                                                                                                                                                                                                                                                                                                                                                                                                                                                                                                                                                                                                                                                                                                                                                                             |
| Date Submitted by the Author:   | 07-Aug-2014                                                                                                                                                                                                                                                                                                                                                                                                                                                                                                                                                                                                                                                                                                                                                                                                                                          |
| Complete List of Authors:       | Mumford, Virginia; University of New South Wales, Centre for Clinical Governance Research<br>Greenfield, David; University of New South Wales, Centre for Clinical Governance Research<br>Hogden, Anne; University of New South Wales, Centre for Clinical Governance Research<br>Debono, Deborah; University of New South Wales, Centre for Clinical Governance Research, Australian Institute of Health Innovation, Faculty of Medicine<br>Gospodarevskaya, Elena; University of New South Wales, Centre for Health Systems and Safety Research<br>Forde, Kevin; University of New South Wales, School of Public Health and Community Medicine<br>Westbrook, Johanna; University of New South Wales, Centre for Health Systems and Safety Research<br>Braithwaite, Jeffrey; Centre for Clinical Governance Research, University of New South Wales |
| <b>Primary Subject Heading</b>: | Health services research                                                                                                                                                                                                                                                                                                                                                                                                                                                                                                                                                                                                                                                                                                                                                                                                                             |
| Secondary Subject Heading:      | Health policy, Health services research                                                                                                                                                                                                                                                                                                                                                                                                                                                                                                                                                                                                                                                                                                                                                                                                              |
| Keywords:                       | Clinical governance < HEALTH SERVICES ADMINISTRATION & MANAGEMENT, Quality in health care < HEALTH SERVICES ADMINISTRATION & MANAGEMENT, Infection control < INFECTIOUS DISEASES, Health policy < HEALTH SERVICES ADMINISTRATION & MANAGEMENT                                                                                                                                                                                                                                                                                                                                                                                                                                                                                                                                                                                                        |
|                                 |                                                                                                                                                                                                                                                                                                                                                                                                                                                                                                                                                                                                                                                                                                                                                                                                                                                      |

SCHOLARONE™  
Manuscripts

## Disentangling quality and safety indicator data: a longitudinal, comparative study of hand hygiene compliance and accreditation outcomes in 96 Australian hospitals

### Authors:

|                                                                   |
|-------------------------------------------------------------------|
| <b>Virginia Mumford</b><br>Doctoral Candidate <sup>1</sup>        |
| <b>David Greenfield</b><br>Associate Professor <sup>1</sup>       |
| <b>Anne Hogden</b><br>Research Fellow <sup>1</sup>                |
| <b>Deborah Debono</b><br>Doctoral Candidate <sup>1</sup>          |
| <b>Elena Gospodarevskaya</b><br>Health Economist <sup>2</sup>     |
| <b>Kevin Forde</b><br>Senior Lecturer <sup>3</sup>                |
| <b>Johanna Westbrook</b><br>Professor and Director <sup>2</sup>   |
| <b>Jeffrey Braithwaite</b><br>Professor and Director <sup>1</sup> |

### Affiliations:

- 1) Centre for Clinical Governance Research, Australian Institute of Health Innovation, UNSW, Sydney, Australia
- 2) Centre for Health Systems and Safety Research, Australian Institute of Health Innovation, UNSW, Sydney, Australia
- 3) School of Public Health and Community Medicine, UNSW, Sydney, Australia

### Contact details of corresponding author:

|                                                                                                                      |
|----------------------------------------------------------------------------------------------------------------------|
| <b>Dr Virginia Mumford</b>                                                                                           |
| <b>Business:</b> + 612 9385 3281                                                                                     |
| <b>Fax:</b> + 612 9663 8692                                                                                          |
| <b>Mobile:</b> + 61458 303 988                                                                                       |
| <b>Email:</b> v.mumford@unsw.edu.au                                                                                  |
| <b>Address:</b> Australian Institute of Health Innovation<br>Faculty of Medicine UNSW<br>Sydney, NSW 2052, Australia |

### Keywords:

Accreditation; Healthcare associated infection;  
Hand hygiene; Performance indicators.

### Manuscript data:

**Words in abstract:** 275  
**Words in body:** 3662  
**Tables:** 2  
**Figures:** 3  
**References:** 49

### Statements:

**Competing interests:** The authors have no competing interests to declare.

**Contributorship:** JB, DG, JW and VM contributed to the concept and design of the study. VM, JB and DG contributed to the acquisition of the data. VM wrote the draft of the manuscript. JB and DG provided a critical revision of the manuscript. VM and EG performed the data analysis, JB, EG, KF, AH, DD, and JW provided expert advice and reviewed the manuscript.

**Data sharing:** No additional data available.

**Ethics:** The University of New South Wales Human Research Ethics Committee has approved this project (approval number HREC 10274).

## Disentangling quality and safety indicator data: a longitudinal, comparative study of hand hygiene compliance and accreditation outcomes in 96 Australian hospitals

### ABSTRACT

**Objectives:** The study aims are twofold. First, to investigate the suitability of hand hygiene as an indicator of accreditation outcomes and, second, to test the hypothesis that hospitals with better accreditation outcomes achieve higher hand hygiene compliance rates.

**Design:** A retrospective, longitudinal, multi-site comparative survey.

**Setting:** Acute public hospitals in New South Wales, Australia.

**Participants:** 96 acute hospitals with accreditation survey results from two surveys during 2009-2012 and submitted data for more than four hand hygiene audits between 2010 and 2013.

**Outcomes:** Our primary outcome comprised observational hand hygiene compliance data from eight audits during 2010 to 2013. The explanatory variables in our multilevel regression model included: accreditation outcomes and scores for the infection control standard; timing of the surveys; and hospital size and activity.

**Results:** Average hand hygiene compliance rates increased from 67.7% to 80.3% during the study period (2010 to 2013), with 46.7% of hospitals achieving target compliance rates of 70% in audit 1, versus 92.3% in audit 8. Average hand hygiene rates at small hospitals were 7.8 percentage points (pp) higher than those at the largest hospitals ( $p < 0.05$ ). The association between hand hygiene rates, accreditation outcomes and infection control scores is less clear.

**Conclusions:** Our results indicate that accreditation outcomes and hand hygiene audit data are measuring different parts of the quality and safety spectrum. Understanding what is being measured when selecting indicators to assess the impact of accreditation is critical as focusing on accreditation results would discount successful hand hygiene implementation by smaller hospitals. Conversely, relying on hand hygiene results would discount the infection control related research and leadership investment by larger hospitals. Our hypothesis appears confounded by an accreditation program that makes it more difficult for smaller hospitals to achieve high infection control scores.

**Strengths and limitations of this study:**

- The main strengths of this study relates to the use of a comprehensive dataset involving the number of acute hospitals (96) participating in the accreditation process and the length of follow up over eight hand hygiene audit points and two accreditation cycles.
- This study also addresses an important research question in terms of identifying and assessing the components of hospital accreditation and quantifying their inter-related benefits.
- The results have important implications for health policy makers internationally in terms of designing health service accreditation programs that can be accurately measured and monitored.
- The main limitation was the lack of a control group as all hospitals in the survey were accredited. This meant it was not possible to assess direct or reverse causal relationships or to prevent omitted variable bias.
- Other limitations include potential measurement error resulting from the use of self-reported hand hygiene data, however, the data collection methods adhered to World Health Organisation best practice guidelines.

## INTRODUCTION

Hospital accreditation programs are designed to set clinical and organisational standards, assess compliance with those standards, and strengthen quality improvement efforts. Accreditation is widely practised with national level accreditation agencies active in at least 27 countries.<sup>1</sup> The problems associated with measuring accreditation benefits are well documented.<sup>2,3</sup> A clear understanding of the inputs, in terms of costs and resource use, and outcomes, in terms of improved patient safety and quality, is essential in ensuring that accreditation programs are achieving their aims of improving patient safety and health care quality.<sup>4,5</sup> Measuring the effects of accreditation on clinical practice and quality of care is important as we need to determine whether the cost burden of data collection and audit processes is outweighed by the expected improvements in quality and safety outcomes.<sup>5</sup>

In this study we analyse the relationship between hand hygiene compliance rates and accreditation outcomes in order to test the suitability of hand hygiene as an indicator of accreditation outcomes. Our hypothesis is that hospitals with better accreditation outcomes and infection control scores than others, reflect organisational processes that support a positive culture toward improving quality and safety,<sup>6</sup> and therefore they would achieve higher hand hygiene compliance rates.

Hand hygiene assessment is an integral component of the infection control standards used to evaluate whether Australian hospitals are compliant with accreditation standards.<sup>7-9</sup> Hand hygiene compliance rates have been validated as a potential process indicator for accreditation outcomes. Moreover, health care associated infections are recognised as a leading cause of increased morbidity and health care costs.<sup>10</sup> A United States (US) study estimated there were 1.7 million healthcare associated infections in 2002, comprising 4.5% of admissions, and resulting in nearly 99,000 deaths.<sup>11</sup> A recent meta-analysis estimated the cost of the five most common healthcare associated infections at US\$9.8 billion per annum.<sup>12</sup> In Australia, the most recent figures available indicate that healthcare associated infections resulted in an extra two million bed days in 2005, with estimated additional costs of AU\$21 million from post-discharge surgical infections.<sup>13</sup>

There is increasing evidence that improving hand hygiene reduces healthcare associated infections and the spread of anti-microbial resistance.<sup>14-18</sup> However, it is difficult to demonstrate a causal link between hand hygiene and healthcare associated infections due to a multiplicity of interventions and scarcity of randomised trials.<sup>19-21</sup> Nevertheless, the World Health Organisation (WHO) has identified good hand hygiene as a major factor in reducing healthcare associated infections based on epidemiological evidence.<sup>18</sup>

Hand hygiene policies in Australian hospitals follow international best practices. They are based on WHO recommendations with a multimodal approach incorporating: access to cleaning agents at the point of care; training and education; monitoring and feedback; reminders in the workplace; and development of an institutional safety climate.<sup>22</sup> Auditors trained by Hand Hygiene Australia monitor hand hygiene activity by direct observation of hospital staff and compare hand hygiene activity against the total number of potential "moments" for hand hygiene.<sup>23</sup> The national target for hand hygiene compliance is 70% and audit results are



publicly reported three times a year. The Australian Commission on Safety and Quality in Health Care (ACSQHC) has recommended that hand hygiene programs need to be repeatedly monitored using both process indicators (compliance rates) and outcome indicators (infection rates).<sup>24</sup>

## METHODS

### Study design, setting and context

The study comprised a retrospective, longitudinal, multi-site comparative survey of hand hygiene compliance rates and accreditation outcomes in acute public hospitals in New South Wales (NSW), Australia. With a population of 7.2 million, NSW comprises 30.5% of the 736 public hospitals and 32.0% of the population in Australia.<sup>25</sup> We employed retrospective data matching techniques over the study period, 2009 to 2013, to analyse the relationship between hand hygiene compliance data and accreditation outcomes.

### Data matching and analysis

#### a) Hand hygiene compliance data

Hand hygiene policies include five “moments” when hand hygiene should be performed: before touching a patient; before a procedure; after a procedure or body fluid exposure risk; after touching a patient; and after touching a patient’s surroundings.<sup>23,26</sup> Audits are carried out three times a year by health care workers who have been accredited by Hand Hygiene Australia. Surveys are conducted using a standardised observation assessment tool which measures hand hygiene activity versus the total number of observed possible “moments”. Auditors are trained in selecting the wards or units for the audit, and the minimum number of required “moments” for each audit is determined by hospital size and activity. We obtained hand hygiene compliance rates data from late 2010 to early 2013 from the NSW Clinical Excellence Commission, the quality and safety body responsible for implementing the hand hygiene initiative in NSW and collecting hand hygiene audit data.<sup>27</sup>

#### b) Accreditation program and infection control standards

Data on accreditation outcomes from 2009 to 2013 were provided by the Australian Council on Healthcare Standards (ACHS). The ACHS Evaluation and Quality Improvement Program (EQuIP) was introduced in 1997 and comprises a four year cycle with external surveys in years two and four.<sup>28</sup> During these surveys, hospitals are assessed by an external team of surveyors against ACHS developed standards. The EQuIP program has undergone several revisions, none of which materially affected this study. Our study period included EQuIP4 which was introduced in 2007 and used for the surveys in 2009 and 2010, and EQuIP5 which was introduced in 2011. Accreditation standards were changed significantly following the introduction of national mandatory standards in 2013,<sup>9</sup> but the infection control criteria were the same for both versions of the EQuIP standards assessed during the study period (see supplementary file 1) . Surveyors scored facilities on a five point Likert scale for each standard or criterion assessed in the survey. Scores were designated as Outstanding Achievement (OA), Extensive Achievement (EA), Moderate Achievement (MA), Some Achievement, and (LA

1  
2  
3 Little Achievement. Hospitals needed to achieve OA, EA or MA, scores in each mandatory standard or criterion  
4 in order to meet accreditation requirements.  
5

6 Infection control related criteria were part of a broader standard regarding the safe provision of care and  
7 services.<sup>7,8</sup> To meet accreditation requirements, hospitals needed to ensure that the infection control policy:  
8 met all regulatory requirements and industry guidelines; had executive support; incorporated ongoing  
9 education activities; and, included indicators to show both compliance with the policy and effective outcome  
10 measurements. Additional activities which counted towards achieving higher (EA and OA) scores included:  
11 benchmarking of performance indicators; use of feedback to inform and improve; contributing to infection  
12 control research; and, recognised leadership in infection control systems.<sup>7,8</sup> Accreditation is often granted to a  
13 cluster of facilities within a local health district and therefore reflects conditions at all the facilities within that  
14 survey group. These clusters are subject to boundary changes, as seen in the NSW 2011 health system re-  
15 organisation, which took place during the study period.<sup>29</sup> We therefore identified the different hospitals  
16 within each cluster in order to match the accreditation scores with the hand hygiene data from individual  
17 hospitals.  
18  
19

### 20 21 22 23 24 25 **Study Variables**

26  
27 To analyse the matched data we used hand hygiene compliance rates as our outcome of interest, expressed as  
28 a continuous outcome variable. Data were available at eight different time points from the end of 2010 to  
29 early 2013 (see Figure 1). We characterised the accreditation scores as either full or partial accreditation.  
30 Partial accreditation was defined as either accreditation being granted for a reduced time, or resulting in a  
31 recommendation for action. No hospitals in the study were refused accreditation during the study period. We  
32 included infection control scores in the model by whether hospitals achieved a higher score in one, none (our  
33 reference case) or both surveys. To test for a possible timing effect we included a variable to identify whether  
34 surveys were either carried out in the 2009 and 2011 accreditation cycle (cycle=0), or the 2010 and 2012 cycle  
35 (cycle=1).  
36  
37  
38  
39  
40

### 41 42 **Figure 1: Timeline of accreditation surveys and hand hygiene audits**

43  
44 <<<Insert Figure 1 here>>>  
45

46 Acute hospitals were grouped according to the Australian Institute of Health and Welfare activity matrix,  
47 based on annual numbers of acute episodes of care adjusted for patient complexity, and geographic location  
48 (see supplementary file 2).<sup>30</sup> We used these groups to create a categorical variable with principal referral and  
49 specialist hospitals as the reference case (principal=0), with large hospitals scored as 1, medium hospitals as 2,  
50 and small hospitals as 3.  
51  
52

### 53 54 **Analysis**

55  
56 The nature of the data, with irregular audit dates and clustering within hospitals, indicated that a multilevel  
57 model would be the most appropriate and would allow adjustment for hospital level variance.<sup>31,32</sup> After  
58  
59  
60

1  
2  
3 matching the accreditation and hand hygiene data our sample comprised 96 hospitals each with two  
4 accreditation surveys. For some hospitals we were not able to match the accreditation outcomes because of  
5 changes in the accreditation clusters. Missing data were higher during the first two audits whilst the program  
6 was progressively implemented. We did not impute values for missing data as the pattern of missing results  
7 indicated these were not missing at random. For example, data from some of the smaller hospitals were not  
8 included as they did not meet the minimum publication requirements during the study period (50 moments of  
9 hand hygiene), which we determined was likely to be related to hospital size.

10  
11  
12  
13  
14 We tested our main model using hand hygiene data from audits 1 through 8 as the outcome variable, and  
15 accreditation outcomes, infection control scores, accreditation cycle, and peer groups as our explanatory  
16 variables. We tested the model fit versus ordinary least squares by calculating the intra-class correlation to  
17 assess the within-hospital effect. We also tested whether to use a random co-efficient or random intercept  
18 model. Analysis was conducted using Stata statistical software (version 12SE),<sup>33</sup> applying a two-sided  
19 significance level of 5%. We also fitted a restrictive model using data from audits 3 to 8 to determine whether  
20 the different peer group mix in the first two surveys was affecting the results.

## 21 22 23 24 25 RESULTS

### 26 27 Hand hygiene and accreditation data analysis

28  
29 We assessed hand hygiene data on 118 hospitals from eight different audit points during 2010 to 2013.  
30 Overall, hand hygiene rates showed an improvement during the study period, with 28 out of 60 hospitals  
31 (46.7%) achieving 70% compliance rates in the first audit in 2010 versus 108 out of 117 hospitals (92.3%) in  
32 the final audit, in early 2013. Average hand hygiene compliance rates increased from 67.7% in audit 1, to  
33 80.3% in audit 8, and remained above the 70% national target rate from audit 2 onwards. The average audit  
34 compliance rates by audit and hospital peer group are shown in Figure 2.

35  
36  
37  
38  
39 **Figure 2:** Mean hand hygiene compliance rates by audit and hospital peer group, 2010-2013<<<Insert Figure 2  
40 here>>>

41  
42  
43 During the study period, 2009-2013, 61 hospitals underwent an accreditation survey in cycle 0, and 44 in cycle  
44 1. The accreditation outcomes showed that 59% of organisations were granted full accreditation in the first  
45 survey in each cycle (during 2009-10) versus 77% in the second survey (2011-12). The number of hospitals  
46 receiving higher infection control scores also increased over time, with 13% receiving a higher score (EA) in the  
47 first survey of each accreditation cycle versus 18% in the second surveys during 2011 and 2012. No hospitals  
48 received an OA score for infection control during the study period. We further examined whether there was a  
49 difference between meeting, or not meeting, the target compliance rates by comparing the partial data from  
50 audit 1 when the program was being rolled out, and the final audit in our study, audit 8 (see Figure 3). Large  
51 hospitals showed the biggest increase, with 30% meeting the target in audit 1, rising to 100% by audit 8.

52  
53  
54  
55  
56  
57 **Figure 3: Percentage of hospitals meeting hand hygiene targets by audit and hospital peer group**

<<<Insert Figure 3 here>>>

We also noted that principal and large hospitals comprised 51.7% of hospitals in audit 1 versus 39.3% in audit 8, suggesting they were early adopters in the program. We tested whether this would influence the results using the restricted model (comprising data from audits 3 to 8). The infection control outcomes also improved over time with 3% of organisations receiving high scores in both surveys in cycle 0 versus 17% in cycle 1, however, we note the absolute small numbers involved (n=8). A size effect was noted with 6.5% (n=2) of smaller hospitals receiving a higher infection control score in at least one survey versus 35.7% (n=10) of principal and 46.2% (n=6) of large hospitals (see Table 1).

**Table 1: Summary characteristics of accreditation and infection control scores**

|                                                                                             | <i>Hospital Peer Group</i> |              |               |              |
|---------------------------------------------------------------------------------------------|----------------------------|--------------|---------------|--------------|
|                                                                                             | <i>Principal</i>           | <i>Large</i> | <i>Medium</i> | <i>Small</i> |
|                                                                                             | <i>N=28</i>                | <i>N=13</i>  | <i>N=24</i>   | <i>N=31</i>  |
| <b>Full accreditation on both surveys</b>                                                   | 57.1%                      | 61.5%        | 33.3%         | 3.2%         |
| <b>Full accreditation in cycle 0 (surveys in 2009 and 2011)</b>                             | 58.8%                      | 62.5%        | 21.4%         | 0.0%         |
| <b>Full accreditation in cycle 1 (surveys in 2010 and 2012)</b>                             | 54.5%                      | 60.0%        | 50.0%         | 10.0%        |
| <b>Higher IC scores in one survey</b>                                                       | 25.0%                      | 30.8%        | 8.3%          | 3.2%         |
| <b>Higher IC scores in both surveys</b>                                                     | 10.7%                      | 15.4%        | 8.3%          | 3.2%         |
| <b>Higher IC scores in either survey</b>                                                    | 35.7%                      | 46.2%        | 16.7%         | 6.5%         |
| <b>Higher IC scores in cycle 0 (surveys in 2009 and 2011)</b>                               | 29.4%                      | 25.0%        | 7.1%          | 0.0%         |
| <b>Higher IC scores in second survey of each cycle (2011 or 2012)</b>                       | 45.5%                      | 80.0%        | 30.0%         | 20.0%        |
| <b>IC=infection control</b>                                                                 |                            |              |               |              |
| <b>Peer group as defined by the Australian Institute of Health and Welfare<sup>30</sup></b> |                            |              |               |              |

### Testing the model

The intra-class correlation co-efficient indicated that 38% of the variance was due to within-hospital effects, indicating sufficient variance for using a random intercept model.<sup>32</sup> We ran a likelihood ratio test using a null model (without the random intercept). This gave a chi-squared test result of 190 (p=0.001), which confirmed our approach versus using ordinary least squares. We also tested the model using infection control scores as a random co-efficient, but the results (chi squared= 0.81, p=0.67) indicated that the random intercept model was more appropriate. We noted a ceiling effect in our data with 100% of large hospitals and 92% of all hospitals meeting the target compliance rates by audit 8, with less incentive to reach higher levels (see Figure 3). Although hospitals were incrementally enrolled in the hand hygiene program, the lack of hand hygiene compliance data in the un-enrolled hospitals meant we were not able to use a stepped wedge design to

provide controls, or evaluate a before and after effect and our results are also subject to omitted variable bias. A fixed effects panel data model might be a more traditional approach to reduce sample variation, but we determined that the random intercept model would be more appropriate due to the policy requirement for all public hospitals to submit hand hygiene data, and the presence of time-invariant variables.<sup>34</sup>

### Multilevel model

After matching the hand hygiene data with hospitals that underwent two accreditation surveys, our main model included data from 661 hand hygiene audits from 96 hospitals, an average of 6.9 audits per hospital. The results (Table 2) show that achieving full accreditation for both surveys was not significantly associated with higher hand hygiene rates versus those hospitals achieving full accreditation in only one survey. The association between hand hygiene rates and infection control scores is less clear. Hospitals achieving higher infection control scores (EA) in one survey (n=14) showed 4.2 percentage point (pp) lower hand hygiene rates than hospitals who just met the accreditation standard (MA score), and this result was significant (p=0.033). Hospitals achieving higher infection control scores in both surveys (n=8) showed higher rates (2.1 pp) but this was not significant (p=0.40). Small and medium sized hospitals experienced significantly higher hand hygiene compliance rates (7.8 pp for small hospitals and 3.5 pp for medium hospitals) compared to principal hospitals. The restricted model, using data from audit 3 onwards, also showed a negative relationship between higher infection control scores and hand hygiene audit results. However, the effect was smaller (2.9 pp) and the results were no longer significant (p=0.14). The size effect in the restricted model was consistent with the main model, with small and medium hospitals showing significantly higher hand hygiene rates than principal referral hospitals. These results do not lend support to our study hypothesis that higher infection control scores are associated with higher hand hygiene rates.

**Table 2: Multilevel model to show effect of accreditation outcomes on hand hygiene audit rates**

| Variables                                      | Main Model (audits 1-8) |                |                 | Restricted Model (audits 3-8) |                |                 |
|------------------------------------------------|-------------------------|----------------|-----------------|-------------------------------|----------------|-----------------|
|                                                | Mean values             | Standard error | <i>p</i> values | Mean values                   | Standard error | <i>p</i> values |
| Full accreditation in both surveys             | 0.004                   | 0.016          | 0.809           | 0.0077                        | 0.016          | 0.620           |
| Higher infection control scores in one survey  | <b>-0.042</b>           | <b>0.020</b>   | <b>0.033</b>    | -0.029                        | 0.020          | 0.135           |
| Higher infection control scores in two surveys | 0.021                   | 0.025          | 0.404           | 0.033                         | 0.024          | 0.172           |
| Later cycle (surveys in 2010/2012)             | 0.024                   | 0.014          | 0.073           | 0.0205                        | 0.013          | 0.123           |

|                                                                                              |              |              |                  |               |              |                  |
|----------------------------------------------------------------------------------------------|--------------|--------------|------------------|---------------|--------------|------------------|
| <b>Hospital peer group* (principal referral=0)</b>                                           |              |              |                  |               |              |                  |
| <b>Large</b>                                                                                 | 0.024        | 0.020        | 0.247            | 0.0233        | 0.023        | 0.244            |
| <b>Medium</b>                                                                                | <b>0.035</b> | <b>0.017</b> | <b>0.046</b>     | <b>0.0343</b> | <b>0.034</b> | <b>0.045</b>     |
| <b>Small</b>                                                                                 | <b>0.078</b> | <b>0.018</b> | <b>&lt;0.001</b> | <b>0.0807</b> | <b>0.081</b> | <b>&lt;0.001</b> |
| <b>Number of observations</b>                                                                | 661          |              |                  | 563           |              |                  |
| <b>Number of hospitals</b>                                                                   | 96           |              |                  | 96            |              |                  |
| <b>Average compliance rates</b>                                                              | 0.741        |              |                  | 0.744         |              |                  |
| <b>Log likelihood</b>                                                                        | 662          |              |                  | 634           |              |                  |
| <b>*Peer group as defined by the Australian Institute of Health and Welfare<sup>30</sup></b> |              |              |                  |               |              |                  |

## DISCUSSION

Our analysis of 118 NSW hospitals showed that hand hygiene rates increased from 67.7% in audit 1 in late 2010 to 80.3% by audit 8 in early 2013. This compares to rates of 62.2% from a sample of NSW hospitals in February 2007 which were observed following the introduction of the Clean Hand Saves Lives campaign during 2006-2007,<sup>15</sup> and continues the improvement shown nationally in Australia with average hand hygiene rates estimated at 68.3% in 2011.<sup>35</sup> It is challenging to compare these results internationally. A US study estimated average hand hygiene rates of 56.6% in 40 hospitals using data collected for one year before and after the introduction of national hand hygiene guidelines in 2002.<sup>36</sup> However, it must be noted that this program was different to that followed by Hand Hygiene Australia and so the results would not be directly comparable.

Smaller hospitals in our study had higher hand hygiene compliance rates but the relationship between accreditation outcomes and hand hygiene data was less clear. This hospital size effect on hand hygiene compliance has been confirmed by other research investigating the link between hand hygiene rates and health care associated *Staphylococcus aureas* bacteraemia.<sup>37 38</sup> We consider the results from small and medium hospitals in our study can be explained by looking at the organisational infrastructure necessary to meet the hand hygiene and accreditation requirements. Both are dependent on a widespread organisational response in terms of education, monitoring, infrastructure and management involvement.<sup>6</sup> Achieving higher infection control scores requires additional benchmarking, feedback and research capabilities.<sup>7 8</sup> The organisational size effect suggests that small and medium sized hospitals can effectively embrace multimodal quality improvement strategies as seen by the higher compliance rates. However, the requirements for achieving high infection control scores within an accreditation survey may be measuring different aspects of quality that are not reflected in the hand hygiene compliance rates. The results indicate that smaller hospitals are able to focus on the practical implementation of a national hand hygiene policy. Having the resources to meet the requirements for higher infection control scores, in terms of conducting research or being recognised leaders in infection control, may not be practical for these smaller organisations. Although some smaller hospitals will be accredited as part of a larger cluster of hospitals, which includes principal and large

1  
2  
3 hospitals, this is not always the case. Our hypothesis that higher accreditation scores would be reflected in  
4 hand hygiene rates appears to be confounded by an accreditation program that makes it more difficult for  
5 smaller hospitals to achieve high infection control scores.  
6

7  
8 This study uses one indicator for evaluating accreditation whereas multiple measures may be more effective.<sup>39</sup>  
9 For example, outcome indicators are widely used in the US hospital system,<sup>40-42</sup> and include hospital acquired  
10 SAB rates and surgical site infection rates. These incorporate a broader mix of the anti-microbial, hand  
11 hygiene, and specialist cleaning practice modules of the infection control standard. Using outcome indicators  
12 would complete Donabedian's triad of performance measures to include structural (accreditation results),  
13 process (hand hygiene compliance rates) and outcome (*Staphylococcus aureus* infection rates) measures.<sup>43 44</sup>  
14  
15

16  
17 Measurement issues in our study include a possible observer effect since the hospital staff might be aware the  
18 audit was taking place. However, although this may increase the compliance rate, the results would still be  
19 valid as the standards include requirements for staff education and installation of appropriate infrastructure.  
20 Increased rates during an audit imply that the correct infrastructure is in place, in terms of availability of  
21 functioning hand washing stations, and that staff are aware of the hand hygiene policies. In addition, any  
22 observer effect is likely to be mitigated as all the hospitals used the same methods for collecting data and thus  
23 are equally subjected to this bias. Other methods to measure hand hygiene activity include measuring  
24 consumption rates of hand hygiene products, such as alcohol rubs,<sup>45</sup> and electronic systems for monitoring  
25 compliance,<sup>46</sup> but WHO guidelines suggest direct observation is still the gold standard.<sup>40</sup> We also note that  
26 although accreditation surveys are assessed on a five point scale, only two scores (MA and EA) were used in  
27 the infection control standard during the four surveys in our study. The lack of granularity in the accreditation  
28 scores makes it difficult to differentiate accreditation performance. Inter-surveyor reliability is recognised as a  
29 limitation of audit systems that are based on subjective assessments.<sup>47</sup> To reduce idiosyncratic scoring, ACHS  
30 surveyors need to provide evidence to ACHS for their scoring methods, and in the decision to award higher  
31 scores, but some variation between surveyors may remain.  
32  
33

34  
35 Limitations of the model include reverse causality in that higher compliance rates could lead to higher  
36 infection control scores at the next survey where hand hygiene audit rates are used as evidence of  
37 implementation during an accreditation survey. This would likely be the case going forward as ACSQHC  
38 includes hand hygiene audit results as part of the evidence of implementation of standard 3 under the new  
39 national standards.<sup>9 48</sup>  
40  
41

#### 42 43 44 45 46 47 48 **Implications**

49  
50 Different indicators will give different perspectives on how an organisation approaches and implements  
51 relevant policy. However, the costs of measurement in health care should be balanced against using a range of  
52 indicators to capture a broader mix of infection control policies, and across the different standards assessed  
53 during accreditation surveys. Indicator selection should include both process indicators, recognised as a  
54 method of measuring organisational changes,<sup>49</sup> and outcome indicators. Public reporting of indicator data  
55  
56  
57  
58  
59  
60

1  
2  
3 further increases the requirement to accurately identify and measure the parts of the patient safety and  
4 quality spectrum that are being addressed. In this study, a focus on the accreditation results would  
5 underestimate the successful implementation of the hand hygiene policy by smaller hospitals. Conversely, just  
6 using hand hygiene results would underestimate the research and leadership investment in infection control  
7 by larger hospitals. Disentangling these two outcomes within the same safety and quality initiative is a pre-  
8 requisite to understanding how they can be effectively assessed and monitored. For example, consideration  
9 could be given to changing criteria for awarding higher scores for infection control such that achieving higher  
10 scores was evidence based and could be feasible for all hospitals.  
11  
12  
13  
14

## 15 **CONCLUSION**

16  
17 Identifying indicators to measure the effectiveness of accreditation is challenging due to the complexity of  
18 implementing a wide range of accreditation related processes across multiple hospital activities. Our results  
19 do not support our study hypothesis that higher infection control scores are associated with higher hand  
20 hygiene rates. Instead, this study suggests that accreditation outcomes and hand hygiene audit data measure  
21 different parts of the quality and safety spectrum. Developing a framework to identify suitable indicators is an  
22 important contribution to understanding the impact of hospital accreditation internationally. Policy makers  
23 need to appreciate the assumptions behind the choice of indicator and understand exactly what is being  
24 measured to ensure that key performance indicators encourage quality improvements in the delivery of  
25 hospital services.  
26  
27  
28  
29  
30

## 31 **ACKNOWLEDGMENTS, COMPETING INTERESTS, and FUNDING**

32  
33 **Acknowledgements:** This study forms part of the Accreditation Collaborative for the Conduct of Research,  
34 Evaluation and Designated Investigations through Teamwork (ACCREDIT) project. The ACCREDIT collaboration  
35 involves researchers in the Centre for Clinical Governance Research and Centre for Health Systems and Safety  
36 Research in the Australian Institute of Health Innovation at the University of New South Wales, Australia. The  
37 ACCREDIT research team benefits from a high-profile international advisory group containing researchers in  
38 health safety and quality from the United Kingdom, Spain and Sweden. The collaboration includes two leading  
39 health safety and quality bodies (ACSQHC and the NSW Clinical Excellence Commission) plus three of the  
40 major Australian health services accreditation agencies: ACHS, Australian General Practice Accreditation  
41 Limited, and the Australian Aged Care Quality Agency. The authors would like to thank ACHS and the NSW  
42 Clinical Excellence Commission for providing data for the study. The authors would also like to acknowledge  
43 the help and encouragement received from the PhD group at the Centre for Health Economics Research and  
44 Evaluation at the University of Technology Sydney, in particular: Prof. Marion Haas; Dr. Rebecca Reeve; and  
45 Ms. Bonny Parkinson.  
46  
47  
48  
49  
50  
51  
52

53  
54 **Competing interests:** None declared  
55  
56  
57  
58  
59  
60



1  
2  
3 **Funding:** This research is supported by the National Health and Medical Research Council Program Grant  
4 568612, and under the Australian Research Council's Linkage Projects scheme (project LP100200586). Industry  
5 partners (ACHS, Australian General Practice Accreditation Limited, and the Australian Aged Care Quality  
6 Agency) contributed to the project design and may provide assistance with its implementation. They may also  
7 contribute to data analysis, interpretation of findings and presentation of results, but have no role in the  
8 design and conduct of the study. Final decision making responsibility for all research activities, including the  
9 decision to submit research for publication, resides with UNSW.  
10  
11  
12

13  
14 **Ethics:** Human Research Ethics Committee approval for this study was granted by UNSW (approval number  
15 HREC 10274).  
16

### 17 **Figure Legends**

18  
19  
20 Figure 1: Timeline of accreditation surveys and hand hygiene audits  
21

22  
23 Figure 2: Mean hand hygiene compliance rates by audit and hospital peer group, 2010-2013  
24

25 Figure 3: Percentage of hospitals meeting hand hygiene targets by audit and hospital peer group  
26  
27  
28  
29  
30  
31  
32  
33  
34  
35  
36  
37  
38  
39  
40  
41  
42  
43  
44  
45  
46  
47  
48  
49  
50  
51  
52  
53  
54  
55  
56  
57  
58  
59  
60

## REFERENCES

1. Shaw CD, Braithwaite J, Moldovan M, *et al.* Profiling health-care accreditation organizations: an international survey. *International Journal for Quality in Health Care* 2013.
2. Mumford V, Forde K, Greenfield D, *et al.* Health services accreditation: what is the evidence that the benefits justify the costs? *International Journal for Quality in Health Care* 2013;first published online August 13.
3. Groene O, Botje D, Suñol R, *et al.* A systematic review of instruments that assess the implementation of hospital quality management systems. *International Journal for Quality in Health Care* 2013;25(5):525-41.
4. Australian Commission on Safety and Quality in Health Care. *Australian Safety and Quality Framework for Health Care, Putting the Framework into action: getting started*. Sydney: ACSQHC, 2011.
5. van Harten WH, Casparie TF, Fisscher OAM. Methodological considerations on the assessment of the implementation of quality management systems. *Health Policy* 2000;54(3):187-200.
6. Braithwaite J, Greenfield D, Westbrook J, *et al.* Health service accreditation as a predictor of clinical and organisational performance: a blinded, random, stratified study. *Quality & Safety in Health Care* 2010;19(1):14-21.
7. Australian Council on Healthcare Standards. *The ACHS EQUIP 4 guide : part 2 – standards*. Ultimo: ACHS, 2007.
8. Australian Council on Healthcare Standards (ACHS). *EQUIP5 standards and criteria*. Ultimo: ACHS, 2010.
9. Australian Commission on Safety and Quality in Health Care (ACSQHC). *National safety and quality health service standards*. Sydney: ACSQHC, 2012.
10. Productivity Commission. *Public and private hospitals: research report*. Canberra: Productivity Commission, 2009.
11. Klevens RM, Edwards JR, Richards C, *et al.* Estimating health care-associated infections and deaths in U.S. hospitals (2002). *Public Health Reports* 2007;122(2):160-66.
12. Zimlichman E, Henderson D, Tamir O, *et al.* Health care-associated infections: a meta-analysis of costs and financial impact on the US health care system. *JAMA Internal Medicine* 2013;173(22):2039-46.
13. Graves N, Weinhold D, Tong E, *et al.* Effect of healthcare-acquired infection on length of hospital stay and cost. *Infection Control and Hospital Epidemiology* 2007;28(3):280-92.
14. Pittet D, Allegranzi B, Sax H, *et al.* Evidence-based model for hand transmission during patient care and the role of improved practices. *The Lancet Infectious Diseases* 2006;6(10):641-52.
15. Grayson ML, Jarvie LJ, Martin R, *et al.* Significant reductions in methicillin-resistant *Staphylococcus aureus* bacteraemia and clinical isolates associated with a multisite, hand hygiene culture-change program and subsequent successful statewide roll-out. *Medical Journal of Australia* 2008;188(11):633-40.
16. Pincock T, Bernstein P, Warthman S, *et al.* Bundling hand hygiene interventions and measurement to decrease health care-associated infections. *American Journal of Infection Control* 2012;40(4 SUPPL.):S18-S27.

17. Johnson P, Martin R, Burrell LJ, *et al.* Efficacy of an alcohol/chlorhexidine hand hygiene program in a hospital with high rates of nosocomial methicillin-resistant *Staphylococcus aureus* (MRSA) infection. *Medical Journal of Australia* 2005;183 (10):509-14.
18. World Health Organization. *WHO guidelines on hand hygiene in health care: a summary. First global patient safety challenge - clean care is safer care.* Geneva, Switzerland: World Health Organisation, 2009.
19. Gould DJ, Moralejo D, Drey N, *et al.* Interventions to improve hand hygiene compliance in patient care. *Cochrane Database of Systematic Reviews (Online)* 2010(9).
20. Backman C, Zoutman DE, Marck PB. An integrative review of the current evidence on the relationship between hand hygiene interventions and the incidence of health care-associated infections. *American Journal of Infection Control* 2008;36(5):333-48.
21. ACSQHC. *Surveillance of Healthcare Associated Infections: Staphylococcus aureus bacteraemia & Clostridium difficile infection - Version 4.0.* Sydney: Australian Commission for Safety and Quality in Health Care, 2012.
22. World Health Organization. *A guide to the implementation of the WHO multimodal hand hygiene improvement strategy.* Geneva: WHO, 2009.
23. Hand Hygiene Australia. *Hand Hygiene Australia manual: 5 moments for hand hygiene. 3rd Edition.* Heidelberg, VIC: Commonwealth of Australia, 2013.
24. Grayson L, Hunt C, Johnson P, *et al.* Hand hygiene. In: Cruickshank M, Ferguson J, editors. *Reducing harm to patients from health care associated infection: the role of surveillance.* Sydney: Australian Commission for Safety and Quality in Health Care, 2008.
25. Australian Institute of Health and Welfare. *Australian hospital statistics 2011–12. Health services series no. 50. Cat. no. HSE 134.* Canberra: AIHW, 2013.
26. ACSQHC. *Australian guidelines for the prevention and control of infection in healthcare.* Canberra: Australian Government, NHMRC & the Australian Commission on Safety and Quality in Healthcare, 2010.
27. Clinical Excellence Commission. *Clinical Excellence Commission Strategic Plan 2012 - 2015.* Sydney: CEC, 2012.
28. Australian Council on Healthcare Standards. *National report on health services accreditation performance 2003-2006.* Ultimo: ACHS, 2007.
29. Commonwealth of Australia. *National health reform: progress and delivery.* Canberra: Department of Health and Ageing, 2011.
30. Independent Hospital Pricing Authority. *National hospital cost data collection, Australian public hospitals cost report 2010-2011, round 15,.* Sydney: IHPA, 2013.
31. Garson D. Fundamentals of hierarchical linear and multilevel modeling. In: Garson D, editor. *Hierarchical linear modeling: guide and applications:* Sage Publications Inc., 2013:3-25.
32. Rabe-Hesketh S, Skrondal A. *Multilevel and longitudinal modelling using stata.* 3rd ed. College Station: Stata Press, 2012.
33. Stata Statistical Software: Release 12 [program]. College Station, TX: StataCorp LP., 2011.

- 1  
2  
3 34. Allison PD. Using panel data to estimate the effects of events. *Sociological Methods & Research*  
4 1994;23(2):174-99.  
5  
6 35. Grayson ML, Russo PL, Cruickshank M, *et al.* Outcomes from the first 2 years of the Australian National  
7 Hand Hygiene Initiative. *Med J Aust* 2011;195(10):615-19.  
8  
9 36. Larson EL, Quiros D, Lin SX. Dissemination of the CDC's Hand Hygiene Guideline and impact on infection  
10 rates. *American Journal of Infection Control* 2007;35:666-75.  
11  
12 37. Playford EG, McDougall D, McLaws M-L. Problematic linkage of publicly disclosed hand hygiene compliance  
13 and health care-associated Staphylococcus aureus bacteraemia rates. *Medical Journal of Australia*  
14 2012;197(1): 29 - 30.  
15  
16 38. Australian Commission on Safety and Quality in Health Care. *National core, hospital-based outcome*  
17 *indicator specification, Version 1.1 - CONSULTATION DRAFT.* Sydney: ACSQHC, 2012.  
18  
19 39. Brown C, Hofer T, Johal A, *et al.* An epistemology of patient safety research: a framework for study design  
20 and interpretation. Part 1. Conceptualising and developing interventions. *Quality and Safety in Health Care*  
21 2008;17(3):158-62.  
22  
23 40. The World Health Organization. *Automated/electronic systems for hand hygiene monitoring: a systematic*  
24 *review* Geneva, Switzerland: WHO, 2013.  
25  
26 41. The Joint Commission. *Improving America's hospitals: The Joint Commission's annual report on quality and*  
27 *safety, 2013.*  
28  
29 42. Agency for Healthcare Research and Quality. *AHRQ quality indicators: inpatient quality indicators.*  
30 Rockville: AHRQ, 2012.  
31  
32 43. Donabedian A. The Quality of Care: How Can It Be Assessed? *JAMA Internal Medicine* 1988;260(12):1743-  
33 48.  
34  
35 44. Mountford J, Shojania KG. Refocusing quality measurement to best support quality improvement: local  
36 ownership of quality measurement by clinicians. *BMJ Quality & Safety* 2012;21(6):519-23.  
37  
38 45. Behnke M, Gastmeier P, Geffers C, *et al.* Establishment of a national surveillance system for alcohol-based  
39 hand rub consumption and change in consumption over 4 years. *Infection Control and Hospital*  
40 *Epidemiology* 212;33(6):618-62.  
41  
42 46. Boyce JM. Measuring healthcare worker hand hygiene activity: current practices and emerging  
43 technologies. *Infection Control and Hospital Epidemiology* 2011;32(10):1016-28.  
44  
45 47. Greenfield D, Pawsey M, Naylor J, *et al.* Are healthcare accreditation surveys reliable? *International Journal*  
46 *of Health Care Quality Assurance* 2009;22(2):105-16.  
47  
48 48. Australian Commission on Safety and Quality in Health Care. *Safety and quality improvement guide,*  
49 *standard 3: preventing and controlling healthcare associated infections.* Sydney: ACSQHC, 2012.  
50  
51 49. Mant J. Process versus outcome indicators in the assessment of quality of health care. *International*  
52 *Journal for Quality in Health Care* 2001;13(6):475-80.  
53  
54  
55  
56  
57  
58  
59  
60

## Disentangling quality and safety indicator data: a longitudinal, comparative study of hand hygiene compliance and accreditation outcomes in 96 Australian hospitals

### Authors:

|                                                                   |
|-------------------------------------------------------------------|
| <b>Virginia Mumford</b><br>Doctoral Candidate <sup>1</sup>        |
| <b>David Greenfield</b><br>Associate Professor <sup>1</sup>       |
| <b>Anne Hogden</b><br>Research Fellow <sup>1</sup>                |
| <b>Deborah Debono</b><br>Doctoral Candidate <sup>1</sup>          |
| <b>Elena Gospodarevskaya</b><br>Health Economist <sup>2</sup>     |
| <b>Kevin Forde</b><br>Senior Lecturer <sup>3</sup>                |
| <b>Johanna Westbrook</b><br>Professor and Director <sup>2</sup>   |
| <b>Jeffrey Braithwaite</b><br>Professor and Director <sup>1</sup> |

### Affiliations:

- 1) Centre for Clinical Governance Research, Australian Institute of Health Innovation, UNSW, Sydney, Australia
- 2) Centre for Health Systems and Safety Research, Australian Institute of Health Innovation, UNSW, Sydney, Australia
- 3) School of Public Health and Community Medicine, UNSW, Sydney, Australia

### Contact details of corresponding author:

|                                                                                                                      |
|----------------------------------------------------------------------------------------------------------------------|
| <b>Dr Virginia Mumford</b>                                                                                           |
| <b>Business:</b> + 612 9385 3281                                                                                     |
| <b>Fax:</b> + 612 9663 8692                                                                                          |
| <b>Mobile:</b> + 61458 303 988                                                                                       |
| <b>Email:</b> v.mumford@unsw.edu.au                                                                                  |
| <b>Address:</b> Australian Institute of Health Innovation<br>Faculty of Medicine UNSW<br>Sydney, NSW 2052, Australia |

### Keywords:

Accreditation; Healthcare associated infection;  
Hand hygiene; Performance indicators.

### Manuscript data:

**Words in abstract:** [280275](#)  
**Words in body:** [35673662](#)  
**Tables:** 2  
**Figures:** [2-3](#)  
**References:** [4849](#)

### Statements:

|                                                                                                                                                                                                                                                                                                                                                                                                                                                                                                                                                                                                                                                                                                                                                                         |
|-------------------------------------------------------------------------------------------------------------------------------------------------------------------------------------------------------------------------------------------------------------------------------------------------------------------------------------------------------------------------------------------------------------------------------------------------------------------------------------------------------------------------------------------------------------------------------------------------------------------------------------------------------------------------------------------------------------------------------------------------------------------------|
| <p><b>Competing interests:</b> The authors have no competing interests to declare.</p> <p><b>Contributorship:</b> JB, DG, JW and VM contributed to the concept and design of the study. VM, JB and DG contributed to the acquisition of the data. VM wrote the draft of the manuscript. JB and DG provided a critical revision of the manuscript. VM and EG performed the data analysis, JB, EG, KF, AH, DD, and JW provided expert advice and reviewed the manuscript.</p> <p><b>Data sharing:</b> <a href="#">Data available on request from the corresponding author</a><del>No additional data available.</del></p> <p><b>Ethics:</b> The University of New South Wales Human Research Ethics Committee has approved this project (approval number HREC 10274).</p> |
|-------------------------------------------------------------------------------------------------------------------------------------------------------------------------------------------------------------------------------------------------------------------------------------------------------------------------------------------------------------------------------------------------------------------------------------------------------------------------------------------------------------------------------------------------------------------------------------------------------------------------------------------------------------------------------------------------------------------------------------------------------------------------|

## Disentangling quality and safety indicator data: a longitudinal, comparative study of hand hygiene compliance and accreditation outcomes in 96 Australian hospitals

### ABSTRACT

**Aim:** We compared hand hygiene compliance rates with accreditation scores over eight hand hygiene audit points and two accreditation cycles in order to test our hypothesis that hospitals with better accreditation outcomes would achieve higher hand hygiene compliance rates.

**Methods:** The study comprised a retrospective, longitudinal, multi-site comparative survey of hand hygiene compliance rates and accreditation outcomes in 96 acute public hospitals in New South Wales (NSW), Australia. We matched observational hand hygiene compliance data with accreditation survey results from 2009 to 2013. Hand hygiene compliance rates were assessed against the following explanatory variables: accreditation and infection control scores; timing of the surveys; and hospital size and activity. We used multilevel regression to analyse the data.

**Results:** Average hand hygiene compliance rates increased from 67.7% to 80.3% during the study period (2010 to 2013), with 46.7% of hospitals achieving target compliance rates of 70% in audit 1, versus 92.3% in audit 8. Average hand hygiene rates at small hospitals were 7.8 percentage points (pp) higher than those at the largest hospitals ( $p < 0.05$ ). Hospitals with higher accreditation scores in one survey unexpectedly showed hand hygiene compliance rates that were 4.1 pp lower ( $p < 0.05$ ) than hospitals with lower IC scores. The association between hand hygiene rates, accreditation outcomes and infection control scores is less clear.

**Conclusions:** Our results indicate that accreditation outcomes and hand hygiene audit data are measuring different parts of the quality and safety spectrum. Our hypothesis appears confounded by an accreditation program that makes it more difficult for smaller hospitals to achieve high IC scores. Understanding what is being measured when selecting indicators to assess the impact of accreditation is critical as focusing on accreditation results would discount successful hand hygiene implementation by smaller hospitals. Conversely, relying on hand hygiene results would discount the IC-related research and leadership investment by larger hospitals.

**Objectives:** The study aims are twofold. First, to investigate the suitability of hand hygiene as an indicator of accreditation outcomes and, second, to test the hypothesis that hospitals with better accreditation outcomes achieve higher hand hygiene compliance rates.

**Design:** A retrospective, longitudinal, multi-site comparative survey.

**Setting:** Acute public hospitals in New South Wales, Australia.

Formatted: No Spacing, Indent: Left: 0",  
First line: 0", Space After: 10 pt

1  
2  
3  
4  
5  
6  
7 Participants: 96 acute hospitals with accreditation survey results from two surveys during 2009-2012 and  
8 submitted data for more than four hand hygiene audits between 2010 and 2013.

9  
10 Outcomes: Our primary outcome comprised observational hand hygiene compliance data from eight audits  
11 during 2010 to 2013. The explanatory variables in our multilevel regression model included: accreditation  
12 outcomes and scores for the infection control standard; timing of the surveys; and hospital size and activity.

13  
14 Results: Average hand hygiene compliance rates increased from 67.7% to 80.3% during the study period (2010  
15 to 2013), with 46.7% of hospitals achieving target compliance rates of 70% in audit 1, versus 92.3% in audit 8.  
16 Average hand hygiene rates at small hospitals were 7.8 percentage points (pp) higher than those at the largest  
17 hospitals (p<0.05). The association between hand hygiene rates, accreditation outcomes and infection control  
18 scores is less clear.

19  
20  
21 Conclusions: Our results indicate that accreditation outcomes and hand hygiene audit data are measuring  
22 different parts of the quality and safety spectrum. Understanding what is being measured when selecting  
23 indicators to assess the impact of accreditation is critical as focusing on accreditation results would discount  
24 successful hand hygiene implementation by smaller hospitals. Conversely, relying on hand hygiene results  
25 would discount the infection control related research and leadership investment by larger hospitals. Our  
26 hypothesis appears confounded by an accreditation program that makes it more difficult for smaller hospitals  
27 to achieve high infection control scores.  
28  
29  
30  
31  
32  
33  
34  
35  
36  
37  
38  
39  
40  
41  
42  
43  
44  
45  
46  
47  
48  
49  
50  
51  
52  
53  
54  
55  
56  
57  
58  
59  
60

**Strengths and limitations of this study:**

- The main strengths of this study ~~relates to the use of a comprehensive dataset involving 115~~ ~~in~~ the number of ~~participating~~ acute hospitals (96) ~~participating in the accreditation process~~ and ~~the~~ length of follow up over eight ~~hand hygiene~~ audit points and two accreditation cycles.
- This study also addresses an important ~~gap~~ ~~research question~~ in terms of identifying ~~and assessing the components of hospital accreditation and~~ ~~or~~ quantifying their ~~inter-related benefits~~, ~~benefits of hospital accreditation~~.
- The results have important implications for health policy makers internationally in terms of designing health service accreditation programs that can be accurately measured and monitored.
- The main limitation was the lack of a control group ~~as all hospitals in the survey were accredited. This meant it was not possible in order~~ to assess direct or reverse causal relationships or to prevent omitted variable bias.
- Other limitations include ~~potential~~ measurement error resulting from ~~using the use of~~ self-reported ~~hand~~ ~~hygiene~~ data, however, the data collection methods adhered to World Health Organisation best practice guidelines.

Formatted: Font color: Auto

Formatted: Line spacing: 1.5 lines



## INTRODUCTION

Hospital accreditation programs are designed to set clinical and organisational standards, ~~ensure~~ assess compliance with those standards, and strengthen quality improvement efforts. Accreditation is widely practised with national level accreditation agencies active in at least 27 countries.<sup>1</sup> The problems associated with measuring accreditation benefits are well documented.<sup>2,3</sup> A clear understanding of the inputs, in terms of costs and resource use, and outcomes, in terms of improved patient safety and quality, is essential in ensuring that accreditation programs are achieving their aims of improving patient safety and health care quality.<sup>4,5</sup> Measuring the effects of accreditation on clinical practice and quality of care is important as we need to determine whether the cost burden of data collection and audit processes ~~are~~ is outweighed by the expected improvements in quality and safety outcomes.<sup>5</sup>

In this study we analyse the relationship between hand hygiene compliance rates and accreditation outcomes in order to test the suitability of hand hygiene as an indicator of accreditation outcomes. Our hypothesis is that hospitals with better accreditation outcomes and infection control ~~(IC)~~ scores than others, reflecting organisational processes that in support of improvement and a positive culture toward improving quality and safety,<sup>6</sup> and therefore they would achieve higher hand hygiene compliance rates.

Hand hygiene assessment is an integral component of the infection control IC standards used to evaluate whether Australian hospitals are compliant with ~~the~~ accreditation standards.<sup>7-9</sup> Hand hygiene compliance rates have been validated as a potential process indicator for accreditation outcomes. Moreover, H health care associated infections ~~(HAIs)~~ are recognised as a leading cause of increased morbidity and health care costs.<sup>10</sup> A United States (US) study estimated there were 1.7 million HAIs healthcare associated infections in 2002, comprising 4.5% of admissions, and resulting in nearly 99,000 deaths.<sup>11</sup> A recent meta-analysis estimated the cost of the five most common HAIs healthcare associated infections at US\$9.8 billion per annum.<sup>12</sup> In Australia, the most recent figures available indicate that HAIs healthcare associated infections resulted in an extra two million bed days in 2005, with estimated additional costs of AU\$21 million from post-discharge surgical infections.<sup>13</sup>

There is increasing evidence that improving hand hygiene reduces HAIs healthcare associated infections and the spread of anti-microbial resistance.<sup>14-18</sup> However, it is difficult to demonstrate a causal link between hand hygiene and HAIs healthcare associated infections due to a multiplicity of interventions and scarcity of randomised trials.<sup>19-21</sup> Nevertheless, the World Health Organization-Organisation (WHO) has identified good hand hygiene as a major factor in reducing HAIs healthcare associated infections based on epidemiological evidence.<sup>18</sup>

Hand hygiene policies in Australian hospitals follow international best practices. They are based on WHO recommendations with a multimodal approach incorporating: access to cleaning agents at the point of care; training and education; monitoring and feedback; reminders in the workplace; and development of an institutional safety climate.<sup>22</sup> Auditors trained by Hand Hygiene Australia ~~(HHA)~~ monitor hand hygiene activity

Formatted: Line spacing: 1.5 lines

1  
2  
3  
4  
5  
6  
7  
8  
9  
10  
11  
12  
13  
14  
15  
16  
17  
18  
19  
20  
21  
22  
23  
24  
25  
26  
27  
28  
29  
30  
31  
32  
33  
34  
35  
36  
37  
38  
39  
40  
41  
42  
43  
44  
45  
46  
47  
48  
49  
50  
51  
52  
53  
54  
55  
56  
57  
58  
59  
60

by direct observation of hospital staff and compare hand hygiene activity against the total number of potential “moments” for hand hygiene.<sup>23</sup> The national target for hand hygiene compliance is 70% and audit results are publicly reported three times a year. The Australian Commission on Safety and Quality in Health Care (ACSQHC) has recommended that hand hygiene programs need to be repeatedly monitored using both process indicators (compliance rates) and outcome indicators (infection rates).<sup>24</sup>

## METHODS

### Study design, setting and context

The study comprised a retrospective, longitudinal, multi-site comparative survey of hand hygiene compliance rates and accreditation outcomes in acute public hospitals in New South Wales (NSW), Australia. With a population of 7.2 million, NSW comprises 30.5% of the 736 public hospitals and 32.0% of the population in Australia.<sup>25</sup> We employed retrospective data matching techniques over the study period, 2009 to 2013, to analyse the relationship between hand hygiene compliance data and accreditation outcomes.

### Data matching and analysis

#### a) Hand hygiene compliance data

Hand hygiene policies include five “moments” when hand hygiene should be performed: before touching a patient; before a procedure; after a procedure or body fluid exposure risk; after touching a patient; and after touching a patient’s surroundings.<sup>23,26</sup> Audits are carried out three times a year by health care workers who have been accredited by [HHA Hand Hygiene Australia](#). Surveys are conducted using a standardised observation assessment tool which measures hand hygiene activity versus the total number of observed possible “moments”. Auditors are trained in selecting the wards or units for the audit, and the minimum number of required “moments” for each audit is determined by hospital size and activity. We obtained ~~the~~ hand hygiene compliance rates data from late 2010 to early 2013 from the NSW Clinical Excellence Commission (~~CEC~~), the quality and safety body responsible for implementing the hand hygiene initiative in NSW and collecting hand hygiene audit data.<sup>27</sup>

#### b) Accreditation program and infection control standards

Data on accreditation outcomes from 2009 to 2013 were provided by the Australian Council on Healthcare Standards (ACHS). The ACHS Evaluation and Quality Improvement Program (EQuIP) was introduced in 1997 and comprises a four year cycle with [external](#) surveys in years two and four.<sup>28</sup> During these surveys, hospitals are assessed by an external team of surveyors against ACHS developed standards. The EQuIP program has undergone several revisions, none of which materially affected this study. Our study period included EQuIP4 which was introduced in 2007 and used for the surveys in 2009 and 2010, and EQuIP5 which was introduced in 2011. [Accreditation standards were changed significantly following the introduction of national mandatory standards in 2013,<sup>9</sup> but the infection control criteria were the same for both versions of the EQuIP standards assessed during the study period \(see supplementary file 1\).](#) ~~Facilities were scored by surveyors~~ [scored](#)

Formatted: Normal, Space After: 0 pt

facilities on a five point Likert scale for each standard or criterion assessed in the survey. Scores were designated as Outstanding Achievement (OA), Extensive Achievement (EA), Moderate Achievement (MA), Some Achievement, and LA Little Achievement. Hospitals needed to achieve OA, EA or MA, EA or OA scores in each mandatory standard or criterion in order to meet accreditation requirements.

ICInfection control related criteria were part of a broader standard regarding the safe provision of care and services.<sup>7,8</sup> To meet MA accreditation requirements, hospitals needed to ensure that the ICinfection control policy: met all regulatory requirements and industry guidelines; had executive support; incorporated ongoing education activities; and, included indicators to show both compliance with the policy and effective outcome measurements. Additional activities which counted towards achieving higher (EA and OA) scores included: benchmarking of performance indicators; use of feedback to inform and improve; ICcontributing to infection control research; and, rrecognised leadership in ICinfection control systems.<sup>7,8</sup> Accreditation is often granted to a cluster of facilities within a local health district and therefore reflects conditions at all the facilities within that survey group. These clusters are subject to boundary changes, as seen in the NSW 2011 health system re-organisation, which took place during the study period (2009-2012).<sup>29</sup> We therefore identified the different hospitals within each cluster in order to match the accreditation scores with the hand hygiene data from individual hospitals.

#### Study Variables

To analyse the matched data we used hand hygiene compliance rates as our outcome of interest, expressed as a continuous outcome variable (hh). Data were available at eight different time points from the end of 2010 to early 2013 (see Figure 1). We characterised the accreditation scores as either full or partial accreditation. Partial accreditation was defined as either accreditation being granted for a reduced time, or resulting in a recommendation for action. No hospitals in the study were refused accreditation during the study period. We included infection control scores in the model by whether hospitals achieved a higher score in one, none (our reference case) or both surveys. To test for a possible timing effect we included a variable to identify whether surveys were either carried out in the 2009 and 2011 accreditation cycle (cycle=0), or the 2010 and 2012 cycle (cycle=1).

#### Figure 1: Timeline of accreditation surveys and hand hygiene audits

<<<Insert Figure 1 here>>>

We created dummy variables for the IC standard to designate whether they achieved a high IC score in the first or second survey in each cycle (hai1 and hai2 respectively). No hospitals scored less than MA during the study period so we differentiated the outcomes by assigning MA as 0, and the higher scores (EA, and OA) as 1. We created a categorical variable for the number of surveys where each hospital achieved high IC scores (hait). There were three possible outcomes: no high scores in either survey (hait=0); high scores in one survey (hait=1); or high scores in both surveys (hait=2). The dummy variable for accreditation (acct) was designated 1 for full accreditation, and 0 for partial accreditation. We defined partial accreditation as either accreditation

1  
2  
3  
4  
5  
6  
7  
8  
9  
10  
11  
12  
13  
14  
15  
16  
17  
18  
19  
20  
21  
22  
23  
24  
25  
26  
27  
28  
29  
30  
31  
32  
33  
34  
35  
36  
37  
38  
39  
40  
41  
42  
43  
44  
45  
46  
47  
48  
49  
50  
51  
52  
53  
54  
55  
56  
57  
58  
59  
60

being granted for a reduced time, or resulting in a recommendation for action. No hospitals in the study were refused accreditation during the study period. We assigned a cycle variable to identify whether surveys were either carried out in the 2009 and 2011 (cycle=0), or 2010 and 2012 (cycle=1).

**Figure 1: Timeline of accreditation surveys and hand hygiene audits**

<Insert Figure 1 here>

Acute hospitals were grouped according to the Australian Institute of Health and Welfare activity matrix, based on annual numbers of acute [case mix adjusted separation episodes of care adjusted for patient complexity](#), and geographic location ([see supplementary file 2](#)).<sup>30</sup> We used these groups to create a categorical variable (*grp*) with principal referral and specialist hospitals as the reference case (principal=0), with large hospitals scored as 1, medium hospitals as 2, and small hospitals as 3.

**Analysis**

The nature of the data, with irregular audit dates and clustering within hospitals, indicated that a multi-level model would be the most appropriate and would allow adjustment for hospital level variance.<sup>31,32</sup> [Our model used audit points as Level-1 units and hospitals as Level-2 units. ?? is this sentence necessary as non-mathematical readers are likely to wonder what level 1 and level 2 mean – I guess it depends how much specific detail is needed about the model](#) After matching the accreditation and hand hygiene data our sample comprised 96 hospitals each with two accreditation surveys. [For some hospitals we were not able to match the accreditation outcomes because of changes in the accreditation clusters. Missing data were higher during the first two audits whilst the program was progressively implemented, and for some hospitals we were not able to match the accreditation outcomes because of changes in the accreditation clusters](#) We did not impute values for missing data as the pattern of missing results indicated these were not missing at random. For example, data from some of the smaller hospitals were not included as they did not meet the minimum publication requirements during the study period (50 moments of hand hygiene), which we determined was likely to be related to hospital size.

We tested our main model [using hand hygiene data from audits 1 through 8 as the outcome variable, and accreditation outcomes, infection control scores, accreditation cycle, and peer groups as our explanatory variables.](#) (comprising the *hh*, *hait*, *acct*, *grp* and *cycle* variables), and fitted a restrictive model using data [from audits 3 to 8. We looked for timing effects by fitting survey models for each survey and cycle \(using the hh, hai1 or hai2, cycle=0 or 1, and grp variables\).](#) We tested the model fit versus ordinary least squares by calculating the intra-class correlation to assess the within-hospital effect. We also tested whether to use a random co-efficient or random intercept model. Analysis was conducted using Stata statistical software (version 12SE),<sup>33</sup> applying a two-sided significance level of 5%. [We also fitted a restrictive model using data from audits 3 to 8 to determine whether the different peer group mix in the first two surveys was affecting the results.](#)

## RESULTS

### Hand hygiene and accreditation data analysis

We assessed hand hygiene data on 118 hospitals from eight different audit points during 2010 to 2013.

Missing data were higher during the first two audits whilst the program was progressively implemented, and for some hospitals we were not able to match the accreditation outcomes because of changes in the accreditation clusters. We did not impute values for missing data as the pattern of missing results indicated these were not missing at random. For example, data from some of the smaller hospitals were not included as they did not meet the minimum publication requirements (50 moments of hand hygiene), which we determined was likely to be related to hospital size.

Overall, hand hygiene rates showed an improvement during the study period, with 28 out of 60 hospitals (46.7%) achieving 70% compliance rates in the first audit in 2010 versus 108 out of 117 hospitals (92.3%) in the final audit, in early 2013. Average hand hygiene compliance rates increased from 67.7% in audit 1, to 80.3% in audit 8, and remained above the 70% national target rate from audit 2 onwards. The average audit compliance rates with minimum and maximum values, and standard deviations, are shown in [table 1](#) and [figure 2](#).

#### [Figure 2: Mean hand hygiene compliance rates by audit and hospital peer group, 2010-2013](#)

<<<Insert Figure 2 here>>>

#### [Figure 2: Hand hygiene compliance audits, 2010-2013](#)

<Insert Figure 2 here>

During the study period, 2009-2013, 61 hospitals underwent an accreditation survey in cycle 0, and 44 in cycle 1. The accreditation outcomes showed that 59% of organisations were granted full accreditation in the first survey in each cycle (during 2009-10) versus 77% in the second survey (2011-12). The number of hospitals receiving a higher infection control scores also increased over time, with 13% receiving a higher score (EA) in the first survey of each accreditation cycle versus 18% in the second surveys during 2011 and 2012. No hospitals received an OA score for infection control during the study period. We further examined whether there was a difference between meeting, or not meeting, the target compliance rates by comparing the partial data from audit 1 when the program was being rolled out, and the final audit in our study, audit 8 ([table 1](#) and [figure 3](#)). This showed that the large hospitals showed the biggest increase, with 30% meeting the target in audit 1, rising to 100% by audit 8.

Principal and large hospitals comprised 51.7% of hospitals in audit 1 versus 39.3% in audit 8, suggesting they were early adopters in the program.

#### [Table 1](#) [Figure 3: Percentage of hospitals meeting hand hygiene targets by audit and hospital peer group](#)

**Comparison of whether hospitals met national hand hygiene targets in audits 1 and 8**

| Hospital groups | Audit 1 |     |       | Audit 8 |     |       |
|-----------------|---------|-----|-------|---------|-----|-------|
|                 | Not met | Met | % Met | Not met | Met | % Met |
| Principal       | 13      | 8   | 38.1  | 2       | 28  | 93.3  |
| Large           | 7       | 3   | 30.0  | 0       | 16  | 100.0 |
| Medium          | 4       | 6   | 60.0  | 3       | 26  | 89.7  |
| Small           | 8       | 11  | 57.9  | 4       | 38  | 90.5  |

<<Insert Figure 3 here>>

We also noted that the principal and large hospitals comprised 51.7% of hospitals in audit 1 versus 39.3% in audit 8, suggesting they were early adopters in the program. We tested whether this would influence the results using the restricted model (comprising data from audits 3 to 8).

The accreditation and IC infection control outcomes also improved over time with full accreditation for both surveys being awarded to 30% of hospitals in cycle 0 versus 42% in cycle 1. IC scores showed a similar pattern with 3% of organisations receiving high scores in both surveys in cycle 0 versus 17% in cycle 1, however, we note the absolute small numbers involved (n=8). A size effect was noted with 6.95% (n=2) of smaller hospitals receiving a higher infection control score in at least one survey versus 27.035.7% (n=10) of principal and 42.946.2% (n=6) of large hospitals (see Table 1).

**Table 1: Summary characteristics of accreditation and infection control scores**

**Table 1: Summary of accreditation and infection control scores, breakdown by peer group and timing of surveys**

|                                                                | Hospital Peer Group |       |        |       |
|----------------------------------------------------------------|---------------------|-------|--------|-------|
|                                                                | Principal           | Large | Medium | Small |
|                                                                | N=28                | N=13  | N=24   | N=31  |
| Full accreditation on both surveys                             | 57.1%               | 61.5% | 33.3%  | 3.2%  |
| Full accreditation in cycle 0 (surveys in 2009 and 2011)       | 58.8%               | 62.5% | 21.4%  | 0.0%  |
| Full accreditation in cycle 1 (surveys in 2010 and 2012)       | 54.5%               | 60.0% | 50.0%  | 10.0% |
| Higher IC scores in one survey                                 | 25.0%               | 30.8% | 8.3%   | 3.2%  |
| Higher IC scores in both surveys                               | 10.7%               | 15.4% | 8.3%   | 3.2%  |
| Higher IC scores in either survey                              | 35.7%               | 46.2% | 16.7%  | 6.5%  |
| Higher IC scores in cycle 0 (surveys in 2009 and 2011)         | 29.4%               | 25.0% | 7.1%   | 0.0%  |
| Higher IC scores in second survey of each cycle (2011 or 2012) | 45.5%               | 80.0% | 30.0%  | 20.0% |

Formatted: Font: Bold  
 Formatted: No Spacing, None, Space After: 10 pt  
 Formatted Table

IC=infection control

Peer group as defined by the Australian Institute of Health and Welfare<sup>30</sup>

<sup>30 34</sup>Testing the model

The intra-class correlation co-efficient indicated that 38% of the variance was due to within-hospital effects, indicating sufficient variance for using a random intercept model.<sup>32</sup> We ran a likelihood ratio test using a null model (without the random intercept). This gave a chi-squared test result of 190 (p=0.001), which confirmed our approach versus using ordinary least squares. We also tested the model using infection control scores as a random co-efficient, but the results (chi squared= 0.81, p=0.67) indicated that the random intercept model was more appropriate. We noted a ceiling effect in our data with 100% of large hospitals and 92% of all hospitals meeting the target compliance rates by audit 8, with less incentive to reach higher levels (see Figure 3). Although hospitals were incrementally enrolled in the hand hygiene program, the lack of hand hygiene compliance data in the un-enrolled hospitals meant we were not able to use a stepped wedge design to provide controls, or evaluate a before and after effect and our results are also subject to omitted variable bias. A fixed effects panel data model might be a more traditional approach to reduce sample variation, but we determined that the random intercept model would be more appropriate due to the policy requirement for all public hospitals to submit hand hygiene data, and the presence of time-invariant variables.<sup>34</sup>

#### Multilevel model

After matching the hand hygiene data with hospitals that underwent two accreditation surveys, our main model included data from 661 hand hygiene audits from 96 hospitals, an average of 6.9 audits per hospital.

The results (Table 2) show that achieving full accreditation for both surveys was not significantly associated with higher hand hygiene rates versus those hospitals achieving full accreditation in only one survey. The association between hand hygiene rates and infection control scores is less clear. Hospitals achieving higher infection control scores (EA) in one survey (n=14) showed 4.2 percentage point (pp) lower hand hygiene rates than hospitals who just met the accreditation standard (MA score), and this result was significant (p=0.033). Hospitals achieving higher infection control scores in both surveys (n=8) showed higher rates (2.1 pp) but this was not significant (p=0.40). Small and medium sized hospitals experienced significantly higher hand hygiene compliance rates (7.8 percentage points (pp)) for small hospitals and 3.8-5 pp for medium hospitals) compared to principal hospitals. The association between hand hygiene rates and accreditation outcomes, for both overall and IC scores, is less clear. Hospitals achieving high IC scores (EA) in one survey (n=14) showed 4.1 pp lower hand hygiene rates than hospitals achieving an MA score, and this result was significant (p=0.038). Hospitals achieving high IC scores in both surveys (n=8) showed higher rates (2.1 pp) but this was not significant (p=0.39). Achieving full accreditation for both surveys was not significantly associated with hand hygiene rates versus those hospitals which achieved full accreditation in only one survey. The restricted

Formatted: Font: Italic

Formatted: No Spacing, None, Space After: 10 pt

model, using data from audit 3 onwards, also showed a negative relationship between higher infection control scores and hand hygiene audit results. However, the effect was smaller (2.89 pp) and the results were no longer significant (p=0.1514). The size effect in the restricted model was consistent with the main model, with small and medium hospitals showing significantly higher hand hygiene rates than principal referral hospitals. These results do not lend support to our study hypothesis that higher infection control scores are associated with higher hand hygiene rates.

These results do not lend support to our study hypothesis that higher infection control scores are associated with higher hand hygiene rates.

I have just cut and pasted the above sentence from the conclusion - I think it is more appropriate here as a summary of the results and how they relate to the original hypothesis - perhaps it can be reworded for the conclusion.

**Table 2: Results of our multilevel model to show effect of accreditation outcomes on hand hygiene audit rates**

**Table 2 - Multilevel model showing association of accreditation outcomes on hand hygiene compliance rates**

| Variables                                      | Main Model (audits 1-8) |                |          | Restricted Model (audits 3-8) |                |          |
|------------------------------------------------|-------------------------|----------------|----------|-------------------------------|----------------|----------|
|                                                | Mean values             | Standard error | p values | Mean values                   | Standard error | p values |
| Full accreditation in both surveys             | 0.004                   | 0.016          | 0.809    | 0.0077                        | 0.016          | 0.620    |
| Higher infection control scores in one survey  | -0.042                  | 0.020          | 0.033    | -0.029                        | 0.020          | 0.135    |
| Higher infection control scores in two surveys | 0.021                   | 0.025          | 0.404    | 0.033                         | 0.024          | 0.172    |
| Later cycle (surveys in 2010/2012)             | 0.024                   | 0.014          | 0.073    | 0.0205                        | 0.013          | 0.123    |
| Hospital peer group* (principal referral=0)    | -                       | -              | -        | -                             | -              | -        |
| Large                                          | 0.024                   | 0.020          | 0.247    | 0.0233                        | 0.023          | 0.244    |
| Medium                                         | 0.035                   | 0.017          | 0.046    | 0.0343                        | 0.034          | 0.045    |
| Small                                          | 0.078                   | 0.018          | <0.001   | 0.0807                        | 0.081          | <0.001   |
| Number of observations                         | 661                     | -              | -        | 563                           | -              | -        |

Formatted Table

Formatted: Right

Formatted: Right

Formatted: Right



|                                                                                              |              |   |   |              |   |   |
|----------------------------------------------------------------------------------------------|--------------|---|---|--------------|---|---|
| <b>Number of hospitals</b>                                                                   | <b>96</b>    | - | - | <b>96</b>    | - | - |
| <b>Average compliance rates</b>                                                              | <b>0.741</b> | - | - | <b>0.744</b> | - | - |
| <b>Log likelihood</b>                                                                        | <b>662</b>   | - | - | <b>634</b>   | - | - |
| <b>*Peer group as defined by the Australian Institute of Health and Welfare<sup>30</sup></b> |              |   |   |              |   |   |

Formatted: Font: Italic

Formatted: Font: Italic, English (U.S.)

30

| Variables                                                   | Main-model     |                 | Restricted-model |       | Survey-models |       |              |       |
|-------------------------------------------------------------|----------------|-----------------|------------------|-------|---------------|-------|--------------|-------|
|                                                             | Audits-1-8     |                 | Audits-3-8       |       | First-Cycle   |       | Second-Cycle |       |
|                                                             | Mean           | SE <sup>1</sup> | Mean             | SE    | Mean          | SE    | Mean         | SE    |
| Higher (OA or EA) score for infection control in one survey | <b>-0.041*</b> | 0.020           | -0.028           | 0.02  |               |       |              |       |
| Higher scores for infection control in both surveys         | 0.021          | 0.025           | 0.034            | 0.024 |               |       |              |       |
| Higher infection control scores in first survey             |                |                 |                  |       | -0.043        | 0.031 | 0.01         | 0.028 |
| Higher infection control scores in second survey            |                |                 |                  |       | 0.045         | 0.027 | -0.007       | 0.022 |
| Full accreditation on both surveys                          | 0.003          | 0.016           | 0.007            | 0.016 |               |       |              |       |
| Cycle (2009/11=0)                                           | 0.022          | 0.014           | 0.018            | 0.013 |               |       |              |       |
| Hospital group (Principal referral=0)                       |                |                 |                  |       |               |       |              |       |
| Large                                                       | 0.022          | 0.02            | 0.024            | 0.02  |               |       |              |       |
| Medium                                                      | <b>0.038*</b>  | 0.018           | <b>0.039*</b>    | 0.017 |               |       |              |       |
| Small                                                       | <b>0.078*</b>  | 0.019           | <b>0.081*</b>    | 0.018 |               |       |              |       |
| Number of observations                                      | 661            |                 | 563              |       | 420           |       | 282          |       |
| Number of hospitals                                         | 96             |                 | 96               |       | 60            |       | 42           |       |
| Average compliance rate                                     | 0.74           |                 | 0.75             |       | 0.75          |       | 0.75         | -     |
| Log likelihood                                              | 661.85         |                 | 633.77           |       | 401.43        |       | 252.52       | -     |

Formatted Table

<sup>1</sup>Standard error, \* Indicates significance at 5% (p<0.05)

Given the greater change in hand hygiene rates during the early audits, we reviewed the data for timing effects by examining the results by survey and cycle. The majority of the first surveys in both cycles were

1  
2  
3  
4  
5  
6  
7 completed before the hand hygiene audits started. The survey models showed that in cycle 0, higher IC scores  
8 were associated with lower hand hygiene results (-4.3 pp) in the first survey, versus a positive relationship in  
9 the second survey (+4.5 pp), however these were not significant ( $p=0.17$  and  $0.102$  respectively) and were  
10 reversed in the second cycle.

### 11 12 **Testing the model**

13  
14 The intra-class correlation coefficient indicated that 38% of the variance was due to within-hospital effects,  
15 indicating sufficient variance for using a random intercept model.<sup>22</sup> We ran a likelihood ratio test using a null  
16 model (without the random intercept). This gave a chi-squared test result of 190 ( $p=0.000$ ), which confirmed  
17 our approach versus using ordinary least squares. We also tested the model using IC scores as a random co-  
18 efficient but the results (chi-squared=0.81,  $p=0.67$ ) indicated that the random intercept model was more  
19 appropriate. We noted a ceiling effect in our data with 100% of large hospitals and 92% of all hospitals  
20 meeting the target compliance rates by audit 8, with less incentive to reach higher levels. Although hospitals  
21 were incrementally enrolled in the hand hygiene program the lack of hand hygiene compliance data in the un-  
22 enrolled hospitals meant we were not able to use a stepped wedge design to provide controls or evaluate a  
23 before-and-after effect and our results are subject to omitted variable bias. A fixed effects panel data model  
24 might be a more traditional approach to reduce sample variation, but we determined that the random  
25 intercept model would be more appropriate due to the policy requirement for all public hospitals to submit  
26 hand hygiene data, and the presence of time-invariant variables.<sup>34</sup>

### 27 28 29 30 31 **DISCUSSION**

32  
33 Our analysis of 118 NSW hospitals showed that hand hygiene rates increased from 67.7% in audit 1 in late  
34 2010 to 80.3% by audit 8 in early 2013. This compares to rates of 62.2% from a sample of NSW hospitals in  
35 February 2007 which were observed following the introduction of the Clean Hand Saves Lives campaign during  
36 2006-2007,<sup>15</sup> and continues the improvement shown nationally in Australia with average hand hygiene rates  
37 estimated at 68.3% in 2011.<sup>35</sup> It is challenging to compare these results internationally. A US study estimated  
38 These results can be compared to average hand hygiene rates of 56.6% in 40 US-hospitals using data collected  
39 for one year before and after the following the introduction of national hand hygiene guidelines in 2002.<sup>36</sup>  
40 However, it must be noted that this program was different to that followed by Hand Hygiene Australia and  
41 so the results would not be directly comparable.

42  
43 Smaller hospitals in our study had higher hand hygiene compliance rates but the relationship between  
44 accreditation outcomes and hand hygiene data was less clear. This effect of hospital size effect on hand  
45 hygiene compliance has ~~received confirmation~~ been confirmed by other research investigating the link  
46 between hand hygiene rates and health care associated *Staphylococcus aureus* bacteraemia (SAB).<sup>37,38</sup> We  
47 consider the results from small and medium hospitals in our study can be explained by looking at the  
48 organisational infrastructure necessary to meet the hand hygiene and accreditation requirements. Both are  
49 dependent on a widespread organisational response in terms of education, monitoring, infrastructure and  
50  
51  
52  
53  
54

1  
2  
3  
4  
5  
6  
7 management involvement.<sup>6</sup> Achieving higher [IC-infection control](#) scores requires additional benchmarking,  
8 feedback and research capabilities.<sup>7,8</sup> The organisational size effect suggests that small and medium sized  
9 hospitals can effectively embrace multimodal quality improvement strategies as seen by the higher  
10 compliance rates. However, the requirements for achieving high [IC-infection control](#) scores within an  
11 accreditation survey may be measuring different aspects of quality that are not reflected in the hand hygiene  
12 compliance rates. The results indicate that smaller hospitals are able to focus on the practical implementation  
13 of a national hand hygiene policy. Having the resources to meet the requirements for higher [IC-infection](#)  
14 [control](#) scores, in terms of conducting research or being recognised leaders in infection control, ~~is~~ may not be  
15 practical for these smaller organisations. Although some smaller hospitals will be accredited as part of a larger  
16 cluster of hospitals, which includes principal and large hospitals, this is not always the case. Our hypothesis  
17 that higher accreditation scores would be reflected in hand hygiene rates appears to be confounded by an  
18 accreditation program that makes it more difficult for smaller hospitals to achieve high [IC-infection control](#)  
19 scores.  
20  
21  
22  
23

24 This study uses one indicator for evaluating accreditation whereas multiple measures may be more effective.<sup>39</sup>  
25 For example, outcome indicators are widely used in the US hospital system,<sup>40-42</sup> and include hospital acquired  
26 SAB rates and surgical site infection rates. These incorporate a broader mix of the anti-microbial, hand  
27 hygiene, and specialist cleaning practice modules of the [IC-infection control](#) standard. Using outcome  
28 indicators would complete Donabedian's triad of performance measures to include structural (accreditation  
29 results), process (hand hygiene compliance rates) and outcome ([Staphylococcus aureas infection rates](#)  
30 [rates](#)) measures.<sup>43,44</sup>  
31  
32

33 Measurement issues in our study include a possible observer effect since the hospital staff might be aware the  
34 audit was taking place. However, although this may increase the compliance rate, the results would still be  
35 valid as the standards include requirements for staff education and installation of appropriate infrastructure.  
36 Increased rates during an audit imply that the correct infrastructure is in place, in terms of availability of  
37 functioning hand washing stations, and that staff are aware of the hand hygiene policies. In addition, any  
38 observer effect is likely to be mitigated as all the hospitals used the same methods for collecting data and thus  
39 are equally subjected to [this](#) bias. Other methods to measure hand hygiene activity include measuring  
40 consumption rates of hand hygiene products, such as alcohol rubs,<sup>45</sup> and electronic systems for monitoring  
41 compliance,<sup>46</sup> but WHO guidelines suggest direct observation is still the gold standard.<sup>40</sup> We also note that  
42 although accreditation surveys are assessed on a five point scale, only two scores (MA and EA) were used in  
43 the infection control standard during the four surveys in our study. The lack of granularity in the accreditation  
44 scores makes it difficult to differentiate accreditation performance. [Inter-surveyor reliability is recognised as a](#)  
45 [limitation of audit systems that are based on subjective assessments.](#)<sup>47</sup> [To reduce idiosyncratic scoring, ACHS](#)  
46 [surveyors need to provide evidence to ACHS for their scoring methods, and in the decision to award higher](#)  
47 [scores, but some variation between surveyors may remain.](#)  
48  
49  
50  
51  
52  
53  
54  
55  
56  
57  
58  
59  
60

1  
2  
3  
4  
5  
6  
7  
8  
9  
10  
11  
12  
13  
14  
15  
16  
17  
18  
19  
20  
21  
22  
23  
24  
25  
26  
27  
28  
29  
30  
31  
32  
33  
34  
35  
36  
37  
38  
39  
40  
41  
42  
43  
44  
45  
46  
47  
48  
49  
50  
51  
52  
53  
54  
55  
56  
57  
58  
59  
60

Limitations of the model include reverse causality in that higher compliance rates could lead to higher [IC infection control](#) scores at the next survey [where hand hygiene audit rates are used as evidence of implementation during an accreditation survey](#). This would likely be the case going forward as ACSQHC includes hand hygiene audit results as part of the evidence of implementation of standard 3 under [the new national standards](#).<sup>9 48</sup>

#### Policy Implications

Different indicators will give different perspectives on how an organisation approaches and implements relevant policy. However, the costs of measurement in health care should be balanced against using a range of indicators to capture a broader mix of [IC infection control](#) policies, and across the different standards assessed during accreditation surveys. Indicator selection should include both process indicators, recognised as a method of measuring organisational changes,<sup>49</sup> and outcome indicators. Public reporting of indicator data further increases the requirement to accurately identify and measure the parts of the patient safety and quality spectrum that are being addressed. In this study, a focus on the accreditation results would [discount underestimate](#) the successful implementation of the hand hygiene policy by smaller hospitals. Conversely, just using hand hygiene results would [discount underestimate](#) the research and leadership investment in infection control by larger hospitals. Disentangling these two outcomes within the same safety and quality initiative is a pre-requisite to understanding how they can be effectively assessed and monitored. [For example, consideration could be given to changing criteria for awarding higher markscores for infection control such that achieving higher scores was evidence based and could be feasible for all hospitals.](#)

#### CONCLUSION

Identifying indicators to measure the effectiveness of accreditation is challenging due to the complexity of implementing a wide range of accreditation related processes across multiple hospital activities. [These Our](#) results do not [lend support to](#) our study hypothesis that higher [IC infection control](#) scores are associated with higher hand hygiene rates. Instead, this study suggests that accreditation outcomes and hand hygiene audit [data data are complementary, measure different parts of the quality and safety spectrum](#). Developing a framework to identify suitable indicators is an important contribution to understanding the impact of hospital accreditation internationally. Policy makers need to appreciate the assumptions behind the choice of indicator and understand exactly what is being measured to ensure that key performance indicators encourage quality improvements in the delivery of hospital services.

#### ACKNOWLEDGMENTS, COMPETING INTERESTS, and FUNDING

**Acknowledgements:** This study forms part of the Accreditation Collaborative for the Conduct of Research, Evaluation and Designated Investigations through Teamwork (ACCREDIT) project. The ACCREDIT collaboration involves researchers in the Centre for Clinical Governance Research and Centre for Health Systems and Safety Research in the Australian Institute of Health Innovation at the University of New South Wales, Australia. The ACCREDIT research team benefits from a high-profile international advisory group containing researchers in

1  
2  
3  
4  
5  
6  
7 health safety and quality from the United Kingdom, Spain and Sweden. The collaboration includes two leading  
8 health safety and quality bodies (ACSQHC and [the NSW Clinical Excellence Commission](#)~~CEC~~) plus three of the  
9 major Australian health services accreditation agencies: ACHS, Australian General Practice Accreditation  
10 Limited (~~AGPAL~~), and the Australian Aged Care Quality Agency (~~AACQA~~). The authors would like to thank ACHS  
11 and the NSW ~~CEC~~ [Clinical Excellence Commission](#) for providing data for the study. The authors would also like  
12 to acknowledge the help and encouragement received from the PhD group at the Centre for Health Economics  
13 Research and Evaluation at the University of Technology Sydney, in particular: Prof. Marion Haas; Dr. Rebecca  
14 Reeve; and Ms. Bonny Parkinson.  
15  
16

17  
18 **Competing interests:** None declared  
19

20 **Funding:** This research is supported by the National Health and Medical Research Council Program Grant  
21 568612, and under the Australian Research Council's Linkage Projects scheme (project LP100200586). Industry  
22 partners (ACHS, [Australian General Practice Accreditation Limited](#)~~AGPAL~~, and [the Australian Aged Care Quality](#)  
23 [Agency](#)~~AACQA~~) contributed to the project design and may provide assistance with its implementation. They  
24 may also contribute to data analysis, interpretation of findings and presentation of results, but have no role in  
25 the design and conduct of the study. Final decision making responsibility for all research activities, including  
26 the decision to submit research for publication, resides with UNSW.  
27  
28

29 **Ethics:** Human Research Ethics Committee approval for this study was granted by UNSW (approval number  
30 HREC 10274).  
31

### 32 [Figure Legends](#)

33  
34  
35 [Figure 1: Timeline of accreditation surveys and hand hygiene audits](#)

36  
37 [Figure 2: Mean hand hygiene compliance rates by audit and hospital peer group, 2010-2013](#)

38  
39 [Figure 3: Percentage of hospitals meeting hand hygiene targets by audit and hospital peer group](#)  
40  
41  
42  
43  
44  
45  
46  
47  
48  
49  
50  
51  
52  
53  
54  
55  
56  
57  
58  
59  
60

## REFERENCES

1. Shaw CD, Braithwaite J, Moldovan M, *et al.* Profiling health-care accreditation organizations: an international survey. *International Journal for Quality in Health Care* 2013.
2. Mumford V, Forde K, Greenfield D, *et al.* Health services accreditation: what is the evidence that the benefits justify the costs? *International Journal for Quality in Health Care* 2013;first published online August 13.
3. Groene O, Botje D, Suñol R, *et al.* A systematic review of instruments that assess the implementation of hospital quality management systems. *International Journal for Quality in Health Care* 2013;25(5):525-41.
4. Australian Commission on Safety and Quality in Health Care. *Australian Safety and Quality Framework for Health Care, Putting the Framework into action: getting started.* Sydney: ACSQHC, 2011.
5. van Harten WH, Casparie TF, Fisscher OAM. Methodological considerations on the assessment of the implementation of quality management systems. *Health Policy* 2000;54(3):187-200.
6. Braithwaite J, Greenfield D, Westbrook J, *et al.* Health service accreditation as a predictor of clinical and organisational performance: a blinded, random, stratified study. *Quality & Safety in Health Care* 2010;19(1):14-21.
7. Australian Council on Healthcare Standards. *The ACHS EQUIP 4 guide : part 2 – standards.* Ultimo: ACHS, 2007.
8. Australian Council on Healthcare Standards (ACHS). *EQUIP5 standards and criteria.* Ultimo: ACHS, 2010.
9. Australian Commission on Safety and Quality in Health Care (ACSQHC). National safety and quality health service standards. Sydney: ACSQHC, 2012.
10. Productivity Commission. *Public and private hospitals: research report.* Canberra: Productivity Commission, 2009.
11. Klevens RM, Edwards JR, Richards C, *et al.* Estimating health care-associated infections and deaths in U.S. hospitals (2002). *Public Health Reports* 2007;122(2):160-66.
12. Zimlichman E, Henderson D, Tamir O, *et al.* Health care-associated infections: a meta-analysis of costs and financial impact on the US health care system. *JAMA Internal Medicine* 2013;173(22):2039-46.
13. Graves N, Weinhold D, Tong E, *et al.* Effect of healthcare-acquired infection on length of hospital stay and cost. *Infection Control and Hospital Epidemiology* 2007;28(3):280-92.
14. Pittet D, Allegranzi B, Sax H, *et al.* Evidence-based model for hand transmission during patient care and the role of improved practices. *The Lancet Infectious Diseases* 2006;6(10):641-52.
15. Grayson ML, Jarvie LJ, Martin R, *et al.* Significant reductions in methicillin-resistant *Staphylococcus aureus* bacteraemia and clinical isolates associated with a multisite, hand hygiene culture-change program and subsequent successful statewide roll-out. *Medical Journal of Australia* 2008;188(11):633-40.
16. Pincock T, Bernstein P, Warthman S, *et al.* Bundling hand hygiene interventions and measurement to decrease health care-associated infections. *American Journal of Infection Control* 2012;40(4 SUPPL.):S18-S27.
17. Johnson P, Martin R, Burrell LJ, *et al.* Efficacy of an alcohol/chlorhexidine hand hygiene program in a hospital with high rates of nosocomial methicillin-resistant *Staphylococcus aureus* (MRSA) infection. *Medical Journal of Australia* 2005;183 (10):509-14.
18. World Health Organization. *WHO guidelines on hand hygiene in health care: a summary. First global patient safety challenge - clean care is safer care.* Geneva, Switzerland: World Health Organisation, 2009.
19. Gould DJ, Moralejo D, Drey N, *et al.* Interventions to improve hand hygiene compliance in patient care. *Cochrane Database of Systematic Reviews (Online)* 2010(9).
20. Backman C, Zoutman DE, Marck PB. An integrative review of the current evidence on the relationship between hand hygiene interventions and the incidence of health care-associated infections. *American Journal of Infection Control* 2008;36(5):333-48.
21. ACSQHC. *Surveillance of Healthcare Associated Infections: Staphylococcus aureus bacteraemia & Clostridium difficile infection - Version 4.0.* Sydney: Australian Commission for Safety and Quality in Health Care, 2012.
22. World Health Organization. *A guide to the implementation of the WHO multimodal hand hygiene improvement strategy.* Geneva: WHO, 2009.
23. Hand Hygiene Australia. *Hand Hygiene Australia manual: 5 moments for hand hygiene. 3rd Edition.* Heidelberg, VIC: Commonwealth of Australia, 2013.

24. Grayson L, Hunt C, Johnson P, *et al*. Hand hygiene. In: Cruickshank M, Ferguson J, editors. *Reducing harm to patients from health care associated infection: the role of surveillance*. Sydney: Australian Commission for Safety and Quality in Health Care, 2008.
25. Australian Institute of Health and Welfare. *Australian hospital statistics 2011–12. Health services series no. 50. Cat. no. HSE 134*. Canberra: AIHW, 2013.
26. ACSQHC. *Australian guidelines for the prevention and control of infection in healthcare*. Canberra: Australian Government, NHMRC & the Australian Commission on Safety and Quality in Healthcare, 2010.
27. Clinical Excellence Commission. *Clinical Excellence Commission Strategic Plan 2012 - 2015*. Sydney: CEC, 2012.
28. Australian Council on HealthCare Standards. *National report on health services accreditation performance 2003-2006*. Ultimo: ACHS, 2007.
29. Commonwealth of Australia. *National health reform: progress and delivery*. Canberra: Department of Health and Ageing, 2011.
30. Independent Hospital Pricing Authority. *National hospital cost data collection, Australian public hospitals cost report 2010-2011, round 15*. Sydney: IHPA, 2013.
31. Garson D. Fundamentals of hierarchical linear and multilevel modeling. In: Garson D, editor. *Hierarchical linear modeling: guide and applications*: Sage Publications Inc., 2013:3-25.
32. Rabe-Hesketh S, Skrondal A. *Multilevel and longitudinal modelling using stata*. 3rd ed. College Station: Stata Press, 2012.
33. Stata Statistical Software: Release 12 [program]. College Station, TX: StataCorp LP., 2011.
34. Allison PD. Using panel data to estimate the effects of events. *Sociological Methods & Research* 1994;23(2):174-99.
35. Grayson ML, Russo PL, Cruickshank M, *et al*. Outcomes from the first 2 years of the Australian National Hand Hygiene Initiative. *Med J Aust* 2011;195(10):615-19.
36. Larson EL, Quiros D, Lin SX. Dissemination of the CDC's Hand Hygiene Guideline and impact on infection rates. *American Journal of Infection Control* 2007;35:666-75.
37. Playford EG, McDougall D, McLaws M-L. Problematic linkage of publicly disclosed hand hygiene compliance and health care-associated Staphylococcus aureus bacteraemia rates. *Medical Journal of Australia* 2012;197(1): 29 - 30.
38. Australian Commission on Safety and Quality in Health Care. *National core, hospital-based outcome indicator specification, Version 1.1 - CONSULTATION DRAFT*. Sydney: ACSQHC, 2012.
39. Brown C, Hofer T, Johal A, *et al*. An epistemology of patient safety research: a framework for study design and interpretation. Part 1. Conceptualising and developing interventions. *Quality and Safety in Health Care* 2008;17(3):158-62.
40. The World Health Organization. *Automated/electronic systems for hand hygiene monitoring: a systematic review* Geneva, Switzerland: WHO, 2013.
41. The Joint Commission. *Improving America's hospitals: The Joint Commission's annual report on quality and safety*, 2013.
42. Agency for Healthcare Research and Quality. *AHRQ quality indicators: inpatient quality indicators*. Rockville: AHRQ, 2012.
43. Donabedian A. The Quality of Care: How Can It Be Assessed? *JAMA Internal Medicine* 1988;260(12):1743-48.
44. Mountford J, Shojania KG. Refocusing quality measurement to best support quality improvement: local ownership of quality measurement by clinicians. *BMJ Quality & Safety* 2012;21(6):519-23.
45. Behnke M, Gastmeier P, Geffers C, *et al*. Establishment of a national surveillance system for alcohol-based hand rub consumption and change in consumption over 4 years. *Infection Control and Hospital Epidemiology* 2012;33(6):618-62.
46. Boyce JM. Measuring healthcare worker hand hygiene activity: current practices and emerging technologies. *Infection Control and Hospital Epidemiology* 2011;32(10):1016-28.
47. Greenfield D, Pawsey M, Naylor J, *et al*. Are healthcare accreditation surveys reliable? *International Journal of Health Care Quality Assurance* 2009;22(2):105-16.
48. Australian Commission on Safety and Quality in Health Care. *Safety and quality improvement guide, standard 3: preventing and controlling healthcare associated infections*. Sydney: ACSQHC, 2012.
49. Mant J. Process versus outcome indicators in the assessment of quality of health care. *International Journal for Quality in Health Care* 2001;13(6):475-80.

1  
2  
3  
4  
5  
6  
7  
8  
9  
10  
11  
12  
13  
14  
15  
16  
17  
18  
19  
20  
21  
22  
23  
24  
25  
26  
27  
28  
29  
30  
31  
32  
33  
34  
35  
36  
37  
38  
39  
40  
41  
42  
43  
44  
45  
46  
47  
48  
49  
50  
51  
52  
53  
54  
55  
56  
57  
58  
59  
60

|

For peer review only

Formatted: EndNote Bibliography, Indent: Left: 0", Hanging: 0.5", Line spacing: single



1  
2  
3  
4  
5  
6  
7  
8  
9  
10  
11  
12  
13  
14  
15  
16  
17  
18  
19  
20  
21  
22  
23  
24  
25  
26  
27  
28  
29  
30  
31  
32  
33  
34  
35  
36  
37  
38  
39  
40  
41  
42  
43  
44  
45  
46  
47  
48  
49  
50  
51  
52  
53  
54  
55  
56  
57  
58  
59  
60

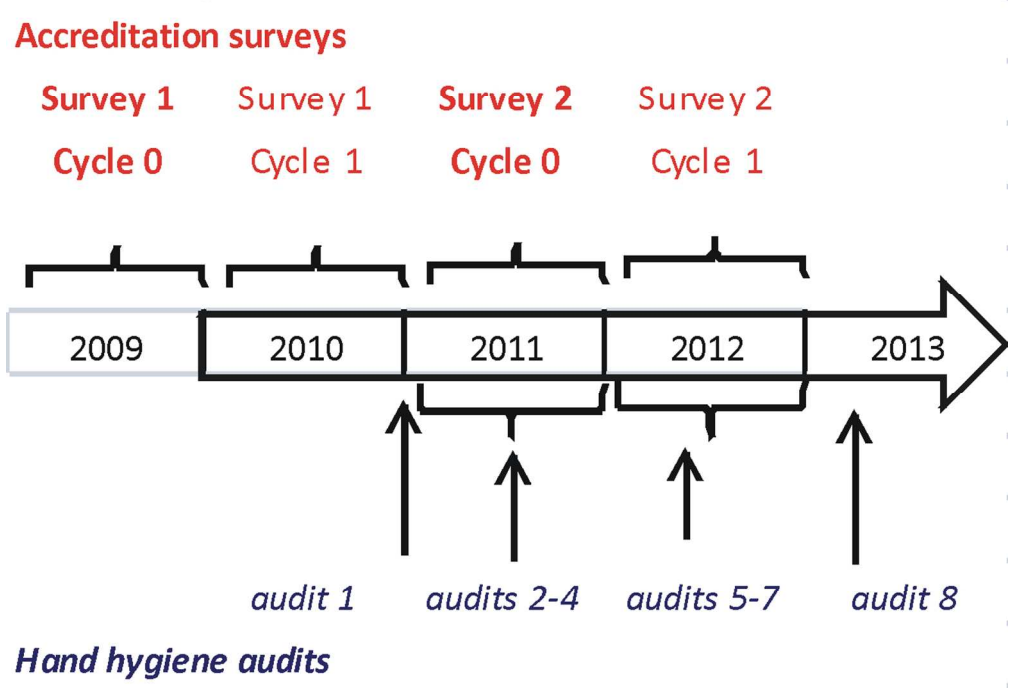

Figure 1: Timeline of accreditation surveys and hand hygiene audits

Review only

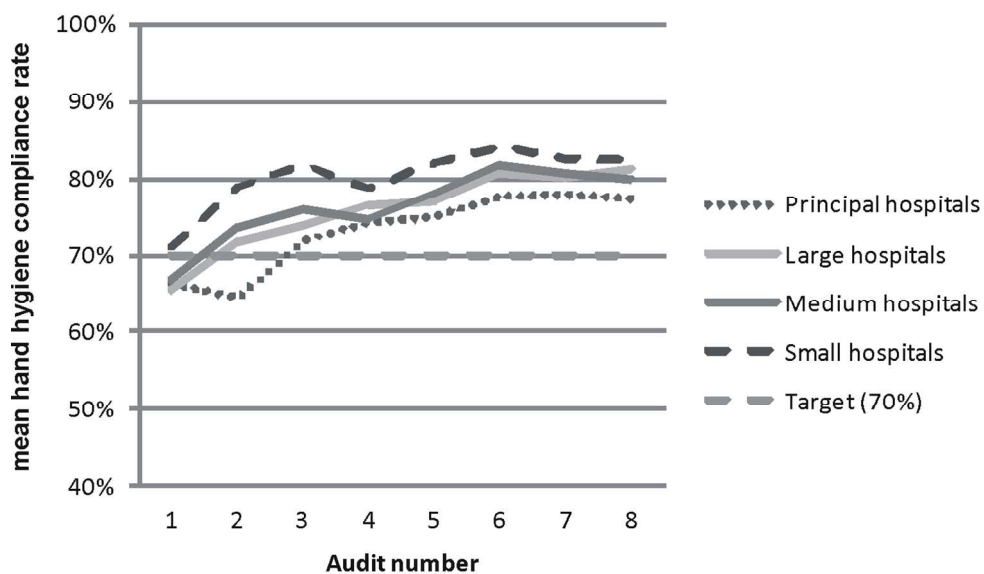

Figure 2: Mean hand hygiene compliance rates by audit and hospital peer group, 2010-2013

review only

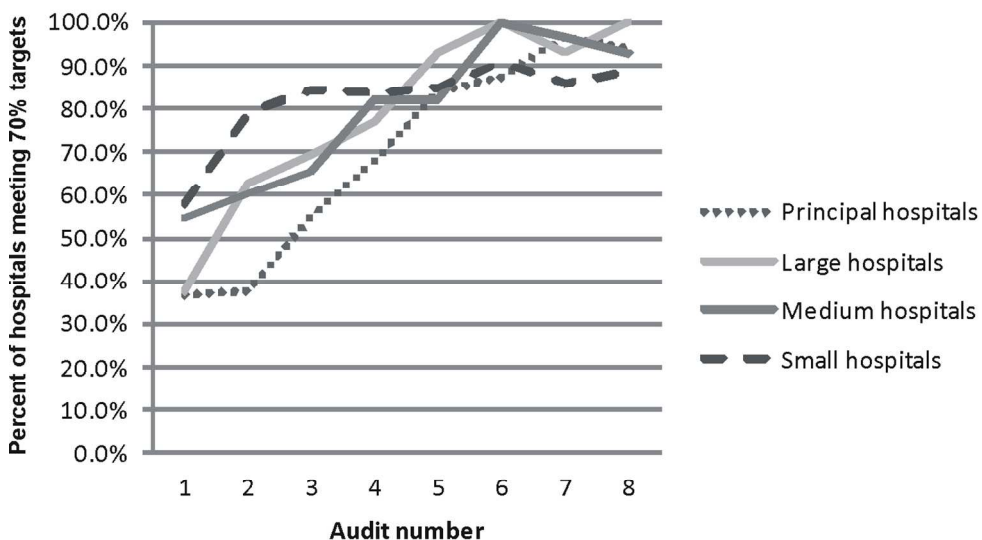

Figure 3: Percentage of hospitals meeting hand hygiene targets by audit and hospital peer group

review only

| <b>Mandatory criteria assessed during EQUIP 4 &amp; 5 surveys</b>                                                                            |
|----------------------------------------------------------------------------------------------------------------------------------------------|
| Care is planned and delivered in collaboration with the consumer/patient and when relevant, the carer, to achieve the best possible outcomes |
| Consumers/patients are informed of the consent process, and they understand and provide consent for their care                               |
| Outcomes of clinical care are evaluated by healthcare providers, and where appropriate, are communicated to the consumer/patient             |
| Processes for clinical handover, transfer of care and discharge, address the needs of the consumer/patient for ongoing care                  |
| The health record ensures comprehensive and accurate information is collaboratively gathered, recorded, and used in care delivery            |
| Medications are managed to ensure safe and effective consumer/patient outcomes                                                               |
| <b>The infection control system supports safe practice and ensures a safe environment for consumers/patients and healthcare workers</b>      |
| The organisation's continuous quality improvement system demonstrates its commitment to improving the outcomes of care and service delivery  |
| The integrated organisation-wide risk management framework ensures that corporate and clinical risks are identified, minimised, and managed  |
| Healthcare incidents are managed to ensure improvements to the systems of care                                                               |
| Processes for credentialling and defining the scope of clinical practice support safe, quality clinical care                                 |
| Documented corporate and clinical policies and procedures assist the organisation to provide safe, quality health care                       |
| Safety management systems ensure safety and wellbeing of consumers/patients, staff, visitors and contractors                                 |
| Emergency and disaster management supports safe practice and a safe environment                                                              |
| <b>Standards for EQUIP 4 and 5<sup>78</sup></b>                                                                                              |

| Hospital Peer Groups                                     | AIHW Definition                                                                                                                                                                                                                                               | Study Definition |
|----------------------------------------------------------|---------------------------------------------------------------------------------------------------------------------------------------------------------------------------------------------------------------------------------------------------------------|------------------|
| Principal referral and specialist women's and children's | A1 Major city hospitals with > 20,000 acute case-mix adjusted separations and Regional hospitals with >16,000 acute case-mix adjusted separations per annum                                                                                                   | <b>Principal</b> |
|                                                          | A2 Specialised acute women's and children's hospitals with >10,000 acute case-mix adjusted separations per annum                                                                                                                                              |                  |
| Large hospitals                                          | B1 Major city acute hospitals treating > 10,000 acute case-mix adjusted separations per annum                                                                                                                                                                 | <b>Large</b>     |
|                                                          | B2 Regional acute hospitals treating > 8,000 acute case-mix adjusted separations per annum, and remote hospitals with > 5,000 case-mix adjusted separations per annum                                                                                         |                  |
| Medium hospitals                                         | C1 Medium acute hospitals in Regional and Major city areas treating between 5,000 and 10,000 acute case-mix adjusted separations per annum                                                                                                                    | <b>Medium</b>    |
|                                                          | C2 Medium acute hospitals in Regional and Major city areas treating between 2,000 and 5,000 acute case-mix adjusted separations per annum, and acute hospitals treating <2000 acute case-mix adjusted separations per annum but > 2,000 separations per annum |                  |
| Small acute hospitals                                    | D1 Small Regional acute hospitals treating < 2000 acute case-mix adjusted separations per annum                                                                                                                                                               | <b>Small</b>     |
|                                                          | D3 Small remote hospitals (< 5,000 acute case-mix adjusted separations per annum), most are < 2,000 separations                                                                                                                                               |                  |

*Australian Institute of Health and Welfare peer groups*<sup>30</sup>

# BMJ Open

## Disentangling quality and safety indicator data: a longitudinal, comparative study of hand hygiene compliance and accreditation outcomes in 96 Australian hospitals

|                                 |                                                                                                                                                                                                                                                                                                                                                                                                                                                                                                                                                                                                                                                                                                                                                                                                                                                      |
|---------------------------------|------------------------------------------------------------------------------------------------------------------------------------------------------------------------------------------------------------------------------------------------------------------------------------------------------------------------------------------------------------------------------------------------------------------------------------------------------------------------------------------------------------------------------------------------------------------------------------------------------------------------------------------------------------------------------------------------------------------------------------------------------------------------------------------------------------------------------------------------------|
| Journal:                        | <i>BMJ Open</i>                                                                                                                                                                                                                                                                                                                                                                                                                                                                                                                                                                                                                                                                                                                                                                                                                                      |
| Manuscript ID:                  | bmjopen-2014-005284.R2                                                                                                                                                                                                                                                                                                                                                                                                                                                                                                                                                                                                                                                                                                                                                                                                                               |
| Article Type:                   | Research                                                                                                                                                                                                                                                                                                                                                                                                                                                                                                                                                                                                                                                                                                                                                                                                                                             |
| Date Submitted by the Author:   | 02-Sep-2014                                                                                                                                                                                                                                                                                                                                                                                                                                                                                                                                                                                                                                                                                                                                                                                                                                          |
| Complete List of Authors:       | Mumford, Virginia; University of New South Wales, Centre for Clinical Governance Research<br>Greenfield, David; University of New South Wales, Centre for Clinical Governance Research<br>Hogden, Anne; University of New South Wales, Centre for Clinical Governance Research<br>Debono, Deborah; University of New South Wales, Centre for Clinical Governance Research, Australian Institute of Health Innovation, Faculty of Medicine<br>Gospodarevskaya, Elena; University of New South Wales, Centre for Health Systems and Safety Research<br>Forde, Kevin; University of New South Wales, School of Public Health and Community Medicine<br>Westbrook, Johanna; University of New South Wales, Centre for Health Systems and Safety Research<br>Braithwaite, Jeffrey; Centre for Clinical Governance Research, University of New South Wales |
| <b>Primary Subject Heading</b>: | Health services research                                                                                                                                                                                                                                                                                                                                                                                                                                                                                                                                                                                                                                                                                                                                                                                                                             |
| Secondary Subject Heading:      | Health policy, Health services research                                                                                                                                                                                                                                                                                                                                                                                                                                                                                                                                                                                                                                                                                                                                                                                                              |
| Keywords:                       | Clinical governance < HEALTH SERVICES ADMINISTRATION & MANAGEMENT, Health & safety < HEALTH SERVICES ADMINISTRATION & MANAGEMENT, Quality in health care < HEALTH SERVICES ADMINISTRATION & MANAGEMENT, Infection control < INFECTIOUS DISEASES, Health policy < HEALTH SERVICES ADMINISTRATION & MANAGEMENT, Organisational development < HEALTH SERVICES ADMINISTRATION & MANAGEMENT                                                                                                                                                                                                                                                                                                                                                                                                                                                               |
|                                 |                                                                                                                                                                                                                                                                                                                                                                                                                                                                                                                                                                                                                                                                                                                                                                                                                                                      |

SCHOLARONE™  
Manuscripts

## Disentangling quality and safety indicator data: a longitudinal, comparative study of hand hygiene compliance and accreditation outcomes in 96 Australian hospitals

### Authors:

|                                                                   |
|-------------------------------------------------------------------|
| <b>Virginia Mumford</b><br>Doctoral Candidate <sup>1</sup>        |
| <b>David Greenfield</b><br>Associate Professor <sup>1</sup>       |
| <b>Anne Hogden</b><br>Research Fellow <sup>1</sup>                |
| <b>Deborah Debono</b><br>Doctoral Candidate <sup>1</sup>          |
| <b>Elena Gospodarevskaya</b><br>Health Economist <sup>2</sup>     |
| <b>Kevin Forde</b><br>Senior Lecturer <sup>3</sup>                |
| <b>Johanna Westbrook</b><br>Professor and Director <sup>2</sup>   |
| <b>Jeffrey Braithwaite</b><br>Professor and Director <sup>1</sup> |

### Affiliations:

- 1) Centre for Clinical Governance Research, Australian Institute of Health Innovation, UNSW, Sydney, Australia
- 2) Centre for Health Systems and Safety Research, Australian Institute of Health Innovation, UNSW, Sydney, Australia
- 3) School of Public Health and Community Medicine, UNSW, Sydney, Australia

### Contact details of corresponding author:

|                                                                                                                      |
|----------------------------------------------------------------------------------------------------------------------|
| <b>Dr Virginia Mumford</b>                                                                                           |
| <b>Business:</b> + 612 9385 3281                                                                                     |
| <b>Fax:</b> + 612 9663 8692                                                                                          |
| <b>Mobile:</b> + 61458 303 988                                                                                       |
| <b>Email:</b> v.mumford@unsw.edu.au                                                                                  |
| <b>Address:</b> Australian Institute of Health Innovation<br>Faculty of Medicine UNSW<br>Sydney, NSW 2052, Australia |

### Keywords:

Accreditation; Healthcare associated infection;  
Hand hygiene; Performance indicators.

### Manuscript data:

**Words in abstract:** 275  
**Words in body:** 3662  
**Tables:** 2  
**Figures:** 3  
**References:** 49

## Disentangling quality and safety indicator data: a longitudinal, comparative study of hand hygiene compliance and accreditation outcomes in 96 Australian hospitals

### ABSTRACT

**Objectives:** The study aims are twofold. First, to investigate the suitability of hand hygiene as an indicator of accreditation outcomes and, second, to test the hypothesis that hospitals with better accreditation outcomes achieve higher hand hygiene compliance rates.

**Design:** A retrospective, longitudinal, multi-site comparative survey.

**Setting:** Acute public hospitals in New South Wales, Australia.

**Participants:** 96 acute hospitals with accreditation survey results from two surveys during 2009-2012 and submitted data for more than four hand hygiene audits between 2010 and 2013.

**Outcomes:** Our primary outcome comprised observational hand hygiene compliance data from eight audits during 2010 to 2013. The explanatory variables in our multilevel regression model included: accreditation outcomes and scores for the infection control standard; timing of the surveys; and hospital size and activity.

**Results:** Average hand hygiene compliance rates increased from 67.7% to 80.3% during the study period (2010 to 2013), with 46.7% of hospitals achieving target compliance rates of 70% in audit 1, versus 92.3% in audit 8. Average hand hygiene rates at small hospitals were 7.8 percentage points (pp) higher than those at the largest hospitals ( $p < 0.05$ ). The association between hand hygiene rates, accreditation outcomes and infection control scores is less clear.

**Conclusions:** Our results indicate that accreditation outcomes and hand hygiene audit data are measuring different parts of the quality and safety spectrum. Understanding what is being measured when selecting indicators to assess the impact of accreditation is critical as focusing on accreditation results would discount successful hand hygiene implementation by smaller hospitals. Conversely, relying on hand hygiene results would discount the infection control related research and leadership investment by larger hospitals. Our hypothesis appears confounded by an accreditation program that makes it more difficult for smaller hospitals to achieve high infection control scores.



**Strengths and limitations of this study:**

- The main strengths of this study relates to the use of a comprehensive dataset involving the number of acute hospitals (96) participating in the accreditation process and the length of follow up over eight hand hygiene audit points and two accreditation cycles.
- This study also addresses an important research question in terms of identifying and assessing the components of hospital accreditation and quantifying their inter-related benefits.
- The results have important implications for health policy makers internationally in terms of designing health service accreditation programs that accurately monitor a wide range of hospital size and type.
- The main limitation was the lack of a control group as all hospitals in the survey were accredited. This meant it was not possible to assess direct or reverse causal relationships or to prevent omitted variable bias.
- Other limitations include potential measurement error resulting from the use of self-reported hand hygiene data, however, the data collection methods adhered to World Health Organisation best practice guidelines.

## INTRODUCTION

Hospital accreditation programs are designed to set clinical and organisational standards, assess compliance with those standards, and strengthen quality improvement efforts. Accreditation is widely practised with national level accreditation agencies active in at least 27 countries.<sup>1</sup> The problems associated with measuring accreditation benefits are well documented.<sup>2,3</sup> A clear understanding of the inputs, in terms of costs and resource use, and outcomes, in terms of improved patient safety and quality, is essential in ensuring that accreditation programs are achieving their aims of improving patient safety and health care quality.<sup>4,5</sup> Measuring the effects of accreditation on clinical practice and quality of care is important as we need to determine whether the cost burden of data collection and audit processes is outweighed by the expected improvements in quality and safety outcomes.<sup>5</sup>

In this study we analyse the relationship between hand hygiene compliance rates and accreditation outcomes in order to test the suitability of hand hygiene as an indicator of accreditation outcomes. Our hypothesis is that hospitals with better accreditation outcomes and infection control scores than others, reflect organisational processes that support a positive culture toward improving quality and safety,<sup>6</sup> and therefore they would achieve higher hand hygiene compliance rates.

Hand hygiene assessment is an integral component of the infection control standards used to evaluate whether Australian hospitals are compliant with accreditation standards.<sup>7-9</sup> Hand hygiene compliance rates have been validated as a potential process indicator for accreditation outcomes. Moreover, health care associated infections are recognised as a leading cause of increased morbidity and health care costs.<sup>10</sup> A United States (US) study estimated there were 1.7 million healthcare associated infections in 2002, comprising 4.5% of admissions, and resulting in nearly 99,000 deaths.<sup>11</sup> A recent meta-analysis estimated the cost of the five most common healthcare associated infections at US\$9.8 billion per annum.<sup>12</sup> In Australia, the most recent figures available indicate that healthcare associated infections resulted in an extra two million bed days in 2005, with estimated additional costs of AU\$21 million from post-discharge surgical infections.<sup>13</sup>

There is increasing evidence that improving hand hygiene reduces healthcare associated infections and the spread of anti-microbial resistance.<sup>14-18</sup> However, it is difficult to demonstrate a causal link between hand hygiene and healthcare associated infections due to a multiplicity of interventions and scarcity of randomised trials.<sup>19-21</sup> Nevertheless, the World Health Organisation (WHO) has identified good hand hygiene as a major factor in reducing healthcare associated infections based on epidemiological evidence.<sup>18</sup>

Hand hygiene policies in Australian hospitals follow international best practices. They are based on WHO recommendations with a multimodal approach incorporating: access to cleaning agents at the point of care; training and education; monitoring and feedback; reminders in the workplace; and development of an institutional safety climate.<sup>22</sup> Auditors trained by Hand Hygiene Australia monitor hand hygiene activity by direct observation of hospital staff and compare hand hygiene activity against the total number of potential "moments" for hand hygiene.<sup>23</sup> The national target for hand hygiene compliance is 70% and audit results are

publicly reported three times a year. The Australian Commission on Safety and Quality in Health Care (ACSQHC) has recommended that hand hygiene programs need to be repeatedly monitored using both process indicators (compliance rates) and outcome indicators (infection rates).<sup>24</sup>

## METHODS

### Study design, setting and context

The study comprised a retrospective, longitudinal, multi-site comparative survey of hand hygiene compliance rates and accreditation outcomes in acute public hospitals in New South Wales (NSW), Australia. With a population of 7.2 million, NSW comprises 30.5% of the 736 public hospitals and 32.0% of the population in Australia.<sup>25</sup> We employed retrospective data matching techniques over the study period, 2009 to 2013, to analyse the relationship between hand hygiene compliance data and accreditation outcomes.

### Data matching and analysis

#### a) Hand hygiene compliance data

Hand hygiene policies include five “moments” when hand hygiene should be performed: before touching a patient; before a procedure; after a procedure or body fluid exposure risk; after touching a patient; and after touching a patient’s surroundings.<sup>23,26</sup> Audits are carried out three times a year by health care workers who have been accredited by Hand Hygiene Australia. Surveys are conducted using a standardised observation assessment tool which measures hand hygiene activity versus the total number of observed possible “moments”. Auditors are trained in selecting the wards or units for the audit, and the minimum number of required “moments” for each audit is determined by hospital size and activity. We obtained hand hygiene compliance rates data from late 2010 to early 2013 from the NSW Clinical Excellence Commission, the quality and safety body responsible for implementing the hand hygiene initiative in NSW and collecting hand hygiene audit data.<sup>27</sup>

#### b) Accreditation program and infection control standards

Data on accreditation outcomes from 2009 to 2013 were provided by the Australian Council on Healthcare Standards (ACHS). The ACHS Evaluation and Quality Improvement Program (EQuIP) was introduced in 1997 and comprises a four year cycle with external surveys in years two and four.<sup>28</sup> During these surveys, hospitals are assessed by an external team of surveyors against ACHS developed standards. The EQuIP program has undergone several revisions, none of which materially affected this study. Our study period included EQuIP4 which was introduced in 2007 and used for the surveys in 2009 and 2010, and EQuIP5 which was introduced in 2011. Accreditation standards were changed significantly following the introduction of national mandatory standards in 2013,<sup>9</sup> but the infection control criteria were the same for both versions of the EQuIP standards assessed during the study period (see supplementary file 1) . Surveyors scored facilities on a five point Likert scale for each standard or criterion assessed in the survey. Scores were designated as Outstanding Achievement (OA), Extensive Achievement (EA), Moderate Achievement (MA), Some Achievement, and (LA

1  
2  
3 Little Achievement. Hospitals needed to achieve OA, EA or MA, scores in each mandatory standard or criterion  
4 in order to meet accreditation requirements.  
5

6 Infection control related criteria were part of a broader standard regarding the safe provision of care and  
7 services.<sup>7,8</sup> To meet accreditation requirements, hospitals needed to ensure that the infection control policy:  
8 met all regulatory requirements and industry guidelines; had executive support; incorporated ongoing  
9 education activities; and, included indicators to show both compliance with the policy and effective outcome  
10 measurements. Additional activities which counted towards achieving higher (EA and OA) scores included:  
11 benchmarking of performance indicators; use of feedback to inform and improve; contributing to infection  
12 control research; and, recognised leadership in infection control systems.<sup>7,8</sup> Accreditation is often granted to a  
13 cluster of facilities within a local health district and therefore reflects conditions at all the facilities within that  
14 survey group. These clusters are subject to boundary changes, as seen in the NSW 2011 health system re-  
15 organisation, which took place during the study period.<sup>29</sup> We therefore identified the different hospitals  
16 within each cluster in order to match the accreditation scores with the hand hygiene data from individual  
17 hospitals.  
18  
19

### 20 21 22 23 24 25 **Study Variables**

26 To analyse the matched data we used hand hygiene compliance rates as our outcome of interest, expressed as  
27 a continuous outcome variable. Data were available at eight different time points from the end of 2010 to  
28 early 2013 (see Figure 1). We characterised the accreditation scores as either full or partial accreditation.  
29 Partial accreditation was defined as either accreditation being granted for a reduced time, or resulting in a  
30 recommendation for action. No hospitals in the study were refused accreditation during the study period. We  
31 included infection control scores in the model by whether hospitals achieved a higher score in one, none (our  
32 reference case) or both surveys. To test for a possible timing effect we included a variable to identify whether  
33 surveys were either carried out in the 2009 and 2011 accreditation cycle (cycle=0), or the 2010 and 2012 cycle  
34 (cycle=1).  
35  
36  
37  
38  
39  
40

### 41 42 **Figure 1: Timeline of accreditation surveys and hand hygiene audits**

43 <<<Insert Figure 1 here>>>

44  
45  
46 Acute hospitals were grouped according to the Australian Institute of Health and Welfare activity matrix,  
47 based on annual numbers of acute episodes of care adjusted for patient complexity, and geographic location  
48 (see supplementary file 2).<sup>30</sup> We used these groups to create a categorical variable with principal referral and  
49 specialist hospitals as the reference case (principal=0), with large hospitals scored as 1, medium hospitals as 2,  
50 and small hospitals as 3.  
51  
52

### 53 54 **Analysis**

55 The nature of the data, with irregular audit dates and clustering within hospitals, indicated that a multilevel  
56 model would be the most appropriate and would allow adjustment for hospital level variance.<sup>31,32</sup> After  
57  
58  
59  
60

1  
2  
3 matching the accreditation and hand hygiene data our sample comprised 96 hospitals each with two  
4 accreditation surveys. For some hospitals we were not able to match the accreditation outcomes because of  
5 changes in the accreditation clusters. Missing data were higher during the first two audits whilst the program  
6 was progressively implemented. We did not impute values for missing data as the pattern of missing results  
7 indicated these were not missing at random. For example, data from some of the smaller hospitals were not  
8 included as they did not meet the minimum publication requirements during the study period (50 moments of  
9 hand hygiene), which we determined was likely to be related to hospital size.

10  
11  
12  
13  
14 We tested our main model using hand hygiene data from audits 1 through 8 as the outcome variable, and  
15 accreditation outcomes, infection control scores, accreditation cycle, and peer groups as our explanatory  
16 variables. We tested the model fit versus ordinary least squares by calculating the intra-class correlation to  
17 assess the within-hospital effect. We also tested whether to use a random co-efficient or random intercept  
18 model. Analysis was conducted using Stata statistical software (version 12SE),<sup>33</sup> applying a two-sided  
19 significance level of 5%. We also fitted a restrictive model using data from audits 3 to 8 to determine whether  
20 the different peer group mix in the first two surveys was affecting the results.

## 21 22 23 24 25 RESULTS

### 26 27 Hand hygiene and accreditation data analysis

28  
29 We assessed hand hygiene data on 118 hospitals from eight different audit points during 2010 to 2013.  
30 Overall, hand hygiene rates showed an improvement during the study period, with 28 out of 60 hospitals  
31 (46.7%) achieving 70% compliance rates in the first audit in 2010 versus 108 out of 117 hospitals (92.3%) in  
32 the final audit, in early 2013. Average hand hygiene compliance rates increased from 67.7% in audit 1, to  
33 80.3% in audit 8, and remained above the 70% national target rate from audit 2 onwards. The average audit  
34 compliance rates by audit and hospital peer group are shown in Figure 2.

35  
36  
37  
38  
39 **Figure 2:** Mean hand hygiene compliance rates by audit and hospital peer group, 2010-2013<<<Insert Figure 2  
40 here>>>

41  
42  
43 During the study period, 2009-2013, 61 hospitals underwent an accreditation survey in cycle 0, and 44 in cycle  
44 1. The accreditation outcomes showed that 59% of organisations were granted full accreditation in the first  
45 survey in each cycle (during 2009-10) versus 77% in the second survey (2011-12). The number of hospitals  
46 receiving higher infection control scores also increased over time, with 13% receiving a high score (EA) in the  
47 first survey of each accreditation cycle versus 18% in the second surveys during 2011 and 2012. No hospitals  
48 received an OA score for infection control during the study period. We further examined whether there was a  
49 difference between meeting, or not meeting, the target compliance rates by comparing the partial data from  
50 audit 1 when the program was being rolled out, and the final audit in our study, audit 8 (see Figure 3). Large  
51 hospitals showed the biggest increase, with 30% meeting the target in audit 1, rising to 100% by audit 8.

52  
53  
54  
55  
56  
57 **Figure 3: Percentage of hospitals meeting hand hygiene targets by audit and hospital peer group**

<<<Insert Figure 3 here>>>

We also noted that principal and large hospitals comprised 51.7% of hospitals in audit 1 versus 39.3% in audit 8, suggesting they were early adopters in the program. We tested whether this would influence the results using the restricted model (comprising data from audits 3 to 8). The infection control outcomes also improved over time with 3% of organisations receiving high scores in both surveys in cycle 0 versus 17% in cycle 1, however, we note the absolute small numbers involved (n=8). A size effect was noted with 6.5% (n=2) of smaller hospitals receiving a higher infection control score in one or both surveys versus 35.7% (n=10) of principal and 46.2% (n=6) of large hospitals (see Table 1).

**Table 1: Summary characteristics of accreditation and infection control scores**

| <i>Table 1: Summary of accreditation and infection control scores, breakdown by peer group and timing of surveys</i> |                            |              |               |              |
|----------------------------------------------------------------------------------------------------------------------|----------------------------|--------------|---------------|--------------|
|                                                                                                                      | <i>Hospital Peer Group</i> |              |               |              |
|                                                                                                                      | <i>Principal</i>           | <i>Large</i> | <i>Medium</i> | <i>Small</i> |
|                                                                                                                      | <i>N=28</i>                | <i>N=13</i>  | <i>N=24</i>   | <i>N=31</i>  |
| <i>Full accreditation on both surveys</i>                                                                            | 57.1%                      | 61.5%        | 33.3%         | 3.2%         |
| <i>Full accreditation in cycle 0 (surveys in 2009 and 2011)</i>                                                      | 58.8%                      | 62.5%        | 21.4%         | 0.0%         |
| <i>Full accreditation in cycle 1 (surveys in 2010 and 2012)</i>                                                      | 54.5%                      | 60.0%        | 50.0%         | 10.0%        |
| <i>High IC scores in one survey</i>                                                                                  | 25.0%                      | 30.8%        | 8.3%          | 3.2%         |
| <i>High IC scores in both surveys</i>                                                                                | 10.7%                      | 15.4%        | 8.3%          | 3.2%         |
|                                                                                                                      |                            |              |               |              |
| <i>High IC scores in cycle 0 (surveys in 2009 and 2011)</i>                                                          | 29.4%                      | 25.0%        | 7.1%          | 0.0%         |
| <i>High IC scores in second survey of each cycle (2011 or 2012)</i>                                                  | 45.5%                      | 80.0%        | 30.0%         | 20.0%        |
| <i>IC=infection control</i>                                                                                          |                            |              |               |              |
| <i>Peer group as defined by the Australian Institute of Health and Welfare<sup>30</sup></i>                          |                            |              |               |              |

#### Testing the model

The intra-class correlation co-efficient indicated that 38% of the variance was due to within-hospital effects, indicating sufficient variance for using a random intercept model.<sup>32</sup> We ran a likelihood ratio test using a null model (without the random intercept). This gave a chi-squared test result of 190 (p=0.001), which confirmed our approach versus using ordinary least squares. We also tested the model using infection control scores as a random co-efficient, but the results (chi squared= 0.81, p=0.67) indicated that the random intercept model was more appropriate. We noted a ceiling effect in our data with 100% of large hospitals and 92% of all hospitals meeting the target compliance rates by audit 8, with less incentive to reach higher levels (see Figure 3). Although hospitals were incrementally enrolled in the hand hygiene program, the lack of hand hygiene compliance data in the un-enrolled hospitals meant we were not able to use a stepped wedge design to

provide controls, or evaluate a before and after effect and our results are also subject to omitted variable bias. A fixed effects panel data model might be a more traditional approach to reduce sample variation, but we determined that the random intercept model would be more appropriate due to the policy requirement for all public hospitals to submit hand hygiene data, and the presence of time-invariant variables.<sup>34</sup>

### Multilevel model

After matching the hand hygiene data with hospitals that underwent two accreditation surveys, our main model included data from 661 hand hygiene audits from 96 hospitals, an average of 6.9 audits per hospital. The results (Table 2) show that achieving full accreditation for both surveys was not significantly associated with higher hand hygiene rates versus those hospitals achieving full accreditation in only one survey. The association between hand hygiene rates and infection control scores is less clear. Hospitals achieving high infection control scores (EA) in one survey (n=14) showed 4.2 percentage point (pp) lower hand hygiene rates than hospitals who just met the accreditation standard (MA score), and this result was significant (p=0.033). Hospitals achieving high infection control scores in both surveys (n=8) showed higher rates (2.1 pp) but this was not significant (p=0.40). Small and medium sized hospitals experienced significantly higher hand hygiene compliance rates (7.8 pp for small hospitals and 3.5 pp for medium hospitals) compared to principal hospitals. The restricted model, using data from audit 3 onwards, also showed a negative relationship between higher infection control scores and hand hygiene audit results. However, the effect was smaller (2.9 pp) and the results were no longer significant (p=0.14). The size effect in the restricted model was consistent with the main model, with small and medium hospitals showing significantly higher hand hygiene rates than principal referral hospitals. These results do not lend support to our study hypothesis that high infection control scores are associated with higher hand hygiene rates.

**Table 2: Multilevel model to show effect of accreditation outcomes on hand hygiene audit rates**

| Table 2 - Multilevel model showing association of accreditation outcomes on hand hygiene compliance rates |                         |                |                 |                               |                |                 |
|-----------------------------------------------------------------------------------------------------------|-------------------------|----------------|-----------------|-------------------------------|----------------|-----------------|
| Variables                                                                                                 | Main Model (audits 1-8) |                |                 | Restricted Model (audits 3-8) |                |                 |
|                                                                                                           | Mean values             | Standard error | <i>p</i> values | Mean values                   | Standard error | <i>p</i> values |
| Full accreditation in both surveys                                                                        | 0.004                   | 0.016          | 0.809           | 0.0077                        | 0.016          | 0.620           |
| High infection control scores in one survey                                                               | <b>-0.042</b>           | <b>0.020</b>   | <b>0.033</b>    | -0.029                        | 0.020          | 0.135           |
| High infection control scores in two surveys                                                              | 0.021                   | 0.025          | 0.404           | 0.033                         | 0.024          | 0.172           |
| Later cycle (surveys in 2010/2012)                                                                        | 0.024                   | 0.014          | 0.073           | 0.0205                        | 0.013          | 0.123           |

|                                                                                              |              |              |                  |               |              |                  |
|----------------------------------------------------------------------------------------------|--------------|--------------|------------------|---------------|--------------|------------------|
| Hospital peer group* (principal referral=0)                                                  |              |              |                  |               |              |                  |
| Large                                                                                        | 0.024        | 0.020        | 0.247            | 0.0233        | 0.023        | 0.244            |
| Medium                                                                                       | <b>0.035</b> | <b>0.017</b> | <b>0.046</b>     | <b>0.0343</b> | <b>0.034</b> | <b>0.045</b>     |
| Small                                                                                        | <b>0.078</b> | <b>0.018</b> | <b>&lt;0.001</b> | <b>0.0807</b> | <b>0.081</b> | <b>&lt;0.001</b> |
| Number of observations                                                                       | 661          |              |                  | 563           |              |                  |
| Number of hospitals                                                                          | 96           |              |                  | 96            |              |                  |
| Average compliance rates                                                                     | 0.741        |              |                  | 0.744         |              |                  |
| Log likelihood                                                                               | 662          |              |                  | 634           |              |                  |
| <i>*Peer group as defined by the Australian Institute of Health and Welfare<sup>30</sup></i> |              |              |                  |               |              |                  |

## DISCUSSION

Our analysis of 118 NSW hospitals showed that hand hygiene rates increased from 67.7% in audit 1 in late 2010 to 80.3% by audit 8 in early 2013. This compares to rates of 62.2% from a sample of NSW hospitals in February 2007 which were observed following the introduction of the Clean Hand Saves Lives campaign during 2006-2007,<sup>15</sup> and continues the improvement shown nationally in Australia with average hand hygiene rates estimated at 68.3% in 2011.<sup>35</sup> It is challenging to compare these results internationally. A US study estimated average hand hygiene rates of 56.6% in 40 hospitals using data collected for one year before and after the introduction of national hand hygiene guidelines in 2002.<sup>36</sup> However, it must be noted that this program was different to that followed by Hand Hygiene Australia and so the results would not be directly comparable.

Smaller hospitals in our study had higher hand hygiene compliance rates but the relationship between accreditation outcomes and hand hygiene data was less clear. This hospital size effect on hand hygiene compliance has been confirmed by other research investigating the link between hand hygiene rates and health care associated *Staphylococcus aureas* bacteraemia.<sup>37 38</sup> We consider the results from small and medium hospitals in our study can be explained by looking at the organisational infrastructure necessary to meet the hand hygiene and accreditation requirements. Both are dependent on a widespread organisational response in terms of education, monitoring, infrastructure and management involvement.<sup>6</sup> Achieving higher infection control scores requires additional benchmarking, feedback and research capabilities.<sup>7 8</sup> The organisational size effect suggests that small and medium sized hospitals can effectively embrace multimodal quality improvement strategies as seen by the higher compliance rates. However, the requirements for achieving high infection control scores within an accreditation survey may be measuring different aspects of quality that are not reflected in the hand hygiene compliance rates. The results indicate that smaller hospitals are able to focus on the practical implementation of a national hand hygiene policy. Having the resources to meet the requirements for higher infection control scores, in terms of conducting research or being recognised leaders in infection control, may not be practical for these smaller organisations. Although some smaller hospitals will be accredited as part of a larger cluster of hospitals, which includes principal and large



1  
2  
3 hospitals, this is not always the case. Our hypothesis that higher accreditation scores would be reflected in  
4 hand hygiene rates appears to be confounded by an accreditation program that makes it more difficult for  
5 smaller hospitals to achieve high infection control scores.  
6

7  
8 This study uses one indicator for evaluating accreditation whereas multiple measures may be more effective.<sup>39</sup>  
9 For example, outcome indicators are widely used in the US hospital system,<sup>40-42</sup> and include hospital acquired  
10 SAB rates and surgical site infection rates. These incorporate a broader mix of the anti-microbial, hand  
11 hygiene, and specialist cleaning practice modules of the infection control standard. Using outcome indicators  
12 would complete Donabedian's triad of performance measures to include structural (accreditation results),  
13 process (hand hygiene compliance rates) and outcome (*Staphylococcus aureus* infection rates) measures.<sup>43 44</sup>  
14  
15

16  
17 Measurement issues in our study include a possible observer effect since the hospital staff might be aware the  
18 audit was taking place. However, although this may increase the compliance rate, the results would still be  
19 valid as the standards include requirements for staff education and installation of appropriate infrastructure.  
20 Increased rates during an audit imply that the correct infrastructure is in place, in terms of availability of  
21 functioning hand washing stations, and that staff are aware of the hand hygiene policies. In addition, any  
22 observer effect is likely to be mitigated as all the hospitals used the same methods for collecting data and thus  
23 are equally subjected to this bias. Other methods to measure hand hygiene activity include measuring  
24 consumption rates of hand hygiene products, such as alcohol rubs,<sup>45</sup> and electronic systems for monitoring  
25 compliance,<sup>46</sup> but WHO guidelines suggest direct observation is still the gold standard.<sup>40</sup> We also note that  
26 although accreditation surveys are assessed on a five point scale, only two scores (MA and EA) were used in  
27 the infection control standard during the four surveys in our study. The lack of granularity in the accreditation  
28 scores makes it difficult to differentiate accreditation performance. Inter-surveyor reliability is recognised as a  
29 limitation of audit systems that are based on subjective assessments.<sup>47</sup> To reduce idiosyncratic scoring, ACHS  
30 surveyors need to provide evidence to ACHS for their scoring methods, and in the decision to award higher  
31 scores, but some variation between surveyors may remain.  
32  
33

34  
35 Limitations of the model include reverse causality in that higher compliance rates could lead to higher  
36 infection control scores at the next survey where hand hygiene audit rates are used as evidence of  
37 implementation during an accreditation survey. This would likely be the case going forward as ACSQHC  
38 includes hand hygiene audit results as part of the evidence of implementation of standard 3 under the new  
39 national standards.<sup>9 48</sup>  
40

#### 41 42 43 44 45 46 47 48 **Implications**

49  
50 Different indicators will give different perspectives on how an organisation approaches and implements  
51 relevant policy. However, the costs of measurement in health care should be balanced against using a range of  
52 indicators to capture a broader mix of infection control policies, and across the different standards assessed  
53 during accreditation surveys. Indicator selection should include both process indicators, recognised as a  
54 method of measuring organisational changes,<sup>49</sup> and outcome indicators. Public reporting of indicator data  
55  
56  
57  
58  
59  
60

1  
2  
3 further increases the requirement to accurately identify and measure the parts of the patient safety and  
4 quality spectrum that are being addressed. In this study, a focus on the accreditation results would  
5 underestimate the successful implementation of the hand hygiene policy by smaller hospitals. Conversely, just  
6 using hand hygiene results would underestimate the research and leadership investment in infection control  
7 by larger hospitals. Disentangling these two outcomes within the same safety and quality initiative is a pre-  
8 requisite to understanding how they can be effectively assessed and monitored. For example, consideration  
9 could be given to changing criteria for awarding higher scores for infection control such that achieving higher  
10 scores was evidence based and could be feasible for all hospitals. Although we focus on Australian hospitals in  
11 our study, international accreditation programs will also need to ensure that indicators accurately capture  
12 outcomes and reflect performance across a range of hospital size and type.  
13  
14  
15  
16  
17  
18  
19  
20

## 21 CONCLUSION

22  
23 Identifying indicators to measure the effectiveness of accreditation is challenging due to the complexity of  
24 implementing a wide range of accreditation related processes across multiple hospital activities. Our results  
25 do not support our study hypothesis that high infection control scores are associated with higher hand  
26 hygiene rates. Instead, this study suggests that accreditation outcomes and hand hygiene audit data measure  
27 different parts of the quality and safety spectrum. Developing a framework to identify suitable indicators is an  
28 important contribution to understanding the impact of hospital accreditation internationally. Policy makers  
29 need to appreciate the assumptions behind the choice of indicator and understand exactly what is being  
30 measured to ensure that key performance indicators encourage quality improvements in the delivery of  
31 hospital services.  
32  
33  
34  
35  
36  
37  
38  
39  
40  
41  
42  
43  
44  
45  
46  
47  
48  
49  
50  
51  
52  
53  
54  
55  
56  
57  
58  
59  
60

**ACKNOWLEDGMENTS, COMPETING INTERESTS, and FUNDING**

**Acknowledgements:** This study forms part of the Accreditation Collaborative for the Conduct of Research, Evaluation and Designated Investigations through Teamwork (ACCREDIT) project. The ACCREDIT collaboration involves researchers in the Centre for Clinical Governance Research and Centre for Health Systems and Safety Research in the Australian Institute of Health Innovation at the University of New South Wales, Australia. The ACCREDIT research team benefits from a high-profile international advisory group containing researchers in health safety and quality from the United Kingdom, Spain and Sweden. The collaboration includes two leading health safety and quality bodies (ACSQHC and the NSW Clinical Excellence Commission) plus three of the major Australian health services accreditation agencies: ACHS, Australian General Practice Accreditation Limited, and the Australian Aged Care Quality Agency. The authors would like to thank ACHS and the NSW Clinical Excellence Commission for providing data for the study. The authors would also like to acknowledge the feedback received on the first draft of the paper from the PhD group at the Centre for Health Economics Research and Evaluation at the University of Technology Sydney, in particular: Prof. Marion Haas; Dr. Rebecca Reeve; and Ms. Bonny Parkinson.

**Competing interests:** None declared

**Funding:** This research is supported by the National Health and Medical Research Council Program Grant 568612, and under the Australian Research Council's Linkage Projects scheme (project LP100200586). Industry partners (ACHS, Australian General Practice Accreditation Limited, and the Australian Aged Care Quality Agency) contributed to the project design and may provide assistance with its implementation. They may also contribute to data analysis, interpretation of findings and presentation of results, but have no role in the design and conduct of the study. Final decision making responsibility for all research activities, including the decision to submit research for publication, resides with UNSW.

**Ethics:** Human Research Ethics Committee approval for this study was granted by UNSW (approval number HREC 10274).

**Contributorship Statement:**

**Contribution:** JB, DG, JW and VM contributed to the concept and design of the study. VM, JB and DG contributed to the acquisition of the data, EG contributed to the model specification and model analysis, KF and AH contributed to the data collection and analysis.

**Drafting:** VM wrote the first draft of the manuscript, JB and DG provided a critical revision of the first draft, EG contributed to drafting the results sections, KF and AH contributed to drafting the methods section, JW contributed to drafting the discussion section.

1  
2  
3 Final approval: All authors reviewed the final manuscript

4 Accountability: All authors approved the final manuscript

5  
6  
7 **Data Sharing Statement:** No additional data available

8  
9 **Figure Legends**

10  
11 Figure 1: Timeline of accreditation surveys and hand hygiene audits

12  
13  
14 Figure 2: Mean hand hygiene compliance rates by audit and hospital peer group, 2010-2013

15  
16 Figure 3: Percentage of hospitals meeting hand hygiene targets by audit and hospital peer group

17  
18  
19  
20  
21  
22  
23  
24  
25  
26  
27  
28  
29  
30  
31  
32  
33  
34  
35  
36  
37  
38  
39  
40  
41  
42  
43  
44  
45  
46  
47  
48  
49  
50  
51  
52  
53  
54  
55  
56  
57  
58  
59  
60

For peer review only

## REFERENCES

1. Shaw CD, Braithwaite J, Moldovan M, *et al.* Profiling health-care accreditation organizations: an international survey. *International Journal for Quality in Health Care* 2013.
2. Mumford V, Forde K, Greenfield D, *et al.* Health services accreditation: what is the evidence that the benefits justify the costs? *International Journal for Quality in Health Care* 2013;first published online August 13.
3. Groene O, Botje D, Suñol R, *et al.* A systematic review of instruments that assess the implementation of hospital quality management systems. *International Journal for Quality in Health Care* 2013;25(5):525-41.
4. Australian Commission on Safety and Quality in Health Care. *Australian Safety and Quality Framework for Health Care, Putting the Framework into action: getting started.* Sydney: ACSQHC, 2011.
5. van Harten WH, Casparie TF, Fisscher OAM. Methodological considerations on the assessment of the implementation of quality management systems. *Health Policy* 2000;54(3):187-200.
6. Braithwaite J, Greenfield D, Westbrook J, *et al.* Health service accreditation as a predictor of clinical and organisational performance: a blinded, random, stratified study. *Quality & Safety in Health Care* 2010;19(1):14-21.
7. Australian Council on Healthcare Standards. *The ACHS EQUIP 4 guide : part 2 – standards.* Ultimo: ACHS, 2007.
8. Australian Council on Healthcare Standards (ACHS). *EQUIP5 standards and criteria.* Ultimo: ACHS, 2010.
9. Australian Commission on Safety and Quality in Health Care (ACSQHC). *National safety and quality health service standards.* Sydney: ACSQHC, 2012.
10. Productivity Commission. *Public and private hospitals: research report.* Canberra: Productivity Commission, 2009.
11. Klevens RM, Edwards JR, Richards C, *et al.* Estimating health care-associated infections and deaths in U.S. hospitals (2002). *Public Health Reports* 2007;122(2):160-66.
12. Zimlichman E, Henderson D, Tamir O, *et al.* Health care-associated infections: a meta-analysis of costs and financial impact on the US health care system. *JAMA Internal Medicine* 2013;173(22):2039-46.
13. Graves N, Weinhold D, Tong E, *et al.* Effect of healthcare-acquired infection on length of hospital stay and cost. *Infection Control and Hospital Epidemiology* 2007;28(3):280-92.
14. Pittet D, Allegranzi B, Sax H, *et al.* Evidence-based model for hand transmission during patient care and the role of improved practices. *The Lancet Infectious Diseases* 2006;6(10):641-52.
15. Grayson ML, Jarvie LJ, Martin R, *et al.* Significant reductions in methicillin-resistant *Staphylococcus aureus* bacteraemia and clinical isolates associated with a multisite, hand hygiene culture-change program and subsequent successful statewide roll-out. *Medical Journal of Australia* 2008;188(11):633-40.
16. Pincock T, Bernstein P, Warthman S, *et al.* Bundling hand hygiene interventions and measurement to decrease health care-associated infections. *American Journal of Infection Control* 2012;40(4 SUPPL.):S18-S27.

17. Johnson P, Martin R, Burrell LJ, *et al.* Efficacy of an alcohol/chlorhexidine hand hygiene program in a hospital with high rates of nosocomial methicillin-resistant *Staphylococcus aureus* (MRSA) infection. *Medical Journal of Australia* 2005;183 (10):509-14.
18. World Health Organization. *WHO guidelines on hand hygiene in health care: a summary. First global patient safety challenge - clean care is safer care.* Geneva, Switzerland: World Health Organisation, 2009.
19. Gould DJ, Moralejo D, Drey N, *et al.* Interventions to improve hand hygiene compliance in patient care. *Cochrane Database of Systematic Reviews (Online)* 2010(9).
20. Backman C, Zoutman DE, Marck PB. An integrative review of the current evidence on the relationship between hand hygiene interventions and the incidence of health care-associated infections. *American Journal of Infection Control* 2008;36(5):333-48.
21. ACSQHC. *Surveillance of Healthcare Associated Infections: Staphylococcus aureus bacteraemia & Clostridium difficile infection - Version 4.0.* Sydney: Australian Commission for Safety and Quality in Health Care, 2012.
22. World Health Organization. *A guide to the implementation of the WHO multimodal hand hygiene improvement strategy.* Geneva: WHO, 2009.
23. Hand Hygiene Australia. *Hand Hygiene Australia manual: 5 moments for hand hygiene. 3rd Edition.* Heidelberg, VIC: Commonwealth of Australia, 2013.
24. Grayson L, Hunt C, Johnson P, *et al.* Hand hygiene. In: Cruickshank M, Ferguson J, editors. *Reducing harm to patients from health care associated infection: the role of surveillance.* Sydney: Australian Commission for Safety and Quality in Health Care, 2008.
25. Australian Institute of Health and Welfare. *Australian hospital statistics 2011–12. Health services series no. 50. Cat. no. HSE 134.* Canberra: AIHW, 2013.
26. ACSQHC. *Australian guidelines for the prevention and control of infection in healthcare.* Canberra: Australian Government, NHMRC & the Australian Commission on Safety and Quality in Healthcare, 2010.
27. Clinical Excellence Commission. *Clinical Excellence Commission Strategic Plan 2012 - 2015.* Sydney: CEC, 2012.
28. Australian Council on Healthcare Standards. *National report on health services accreditation performance 2003-2006.* Ultimo: ACHS, 2007.
29. Commonwealth of Australia. *National health reform: progress and delivery.* Canberra: Department of Health and Ageing, 2011.
30. Independent Hospital Pricing Authority. *National hospital cost data collection, Australian public hospitals cost report 2010-2011, round 15,.* Sydney: IHPA, 2013.
31. Garson D. Fundamentals of hierarchical linear and multilevel modeling. In: Garson D, editor. *Hierarchical linear modeling: guide and applications:* Sage Publications Inc., 2013:3-25.
32. Rabe-Hesketh S, Skrondal A. *Multilevel and longitudinal modelling using stata.* 3rd ed. College Station: Stata Press, 2012.
33. Stata Statistical Software: Release 12 [program]. College Station, TX: StataCorp LP., 2011.

- 1  
2  
3 34. Allison PD. Using panel data to estimate the effects of events. *Sociological Methods & Research*  
4 1994;23(2):174-99.  
5  
6 35. Grayson ML, Russo PL, Cruickshank M, *et al.* Outcomes from the first 2 years of the Australian National  
7 Hand Hygiene Initiative. *Med J Aust* 2011;195(10):615-19.  
8  
9 36. Larson EL, Quiros D, Lin SX. Dissemination of the CDC's Hand Hygiene Guideline and impact on infection  
10 rates. *American Journal of Infection Control* 2007;35:666-75.  
11  
12 37. Playford EG, McDougall D, McLaws M-L. Problematic linkage of publicly disclosed hand hygiene compliance  
13 and health care-associated Staphylococcus aureus bacteraemia rates. *Medical Journal of Australia*  
14 2012;197(1): 29 - 30.  
15  
16 38. Australian Commission on Safety and Quality in Health Care. *National core, hospital-based outcome*  
17 *indicator specification, Version 1.1 - CONSULTATION DRAFT.* Sydney: ACSQHC, 2012.  
18  
19 39. Brown C, Hofer T, Johal A, *et al.* An epistemology of patient safety research: a framework for study design  
20 and interpretation. Part 1. Conceptualising and developing interventions. *Quality and Safety in Health Care*  
21 2008;17(3):158-62.  
22  
23 40. The World Health Organization. *Automated/electronic systems for hand hygiene monitoring: a systematic*  
24 *review* Geneva, Switzerland: WHO, 2013.  
25  
26 41. The Joint Commission. *Improving America's hospitals: The Joint Commission's annual report on quality and*  
27 *safety, 2013.*  
28  
29 42. Agency for Healthcare Research and Quality. *AHRQ quality indicators: inpatient quality indicators.*  
30 Rockville: AHRQ, 2012.  
31  
32 43. Donabedian A. The Quality of Care: How Can It Be Assessed? *JAMA Internal Medicine* 1988;260(12):1743-  
33 48.  
34  
35 44. Mountford J, Shojania KG. Refocusing quality measurement to best support quality improvement: local  
36 ownership of quality measurement by clinicians. *BMJ Quality & Safety* 2012;21(6):519-23.  
37  
38 45. Behnke M, Gastmeier P, Geffers C, *et al.* Establishment of a national surveillance system for alcohol-based  
39 hand rub consumption and change in consumption over 4 years. *Infection Control and Hospital*  
40 *Epidemiology* 212;33(6):618-62.  
41  
42 46. Boyce JM. Measuring healthcare worker hand hygiene activity: current practices and emerging  
43 technologies. *Infection Control and Hospital Epidemiology* 2011;32(10):1016-28.  
44  
45 47. Greenfield D, Pawsey M, Naylor J, *et al.* Are healthcare accreditation surveys reliable? *International Journal*  
46 *of Health Care Quality Assurance* 2009;22(2):105-16.  
47  
48 48. Australian Commission on Safety and Quality in Health Care. *Safety and quality improvement guide,*  
49 *standard 3: preventing and controlling healthcare associated infections.* Sydney: ACSQHC, 2012.  
50  
51 49. Mant J. Process versus outcome indicators in the assessment of quality of health care. *International*  
52 *Journal for Quality in Health Care* 2001;13(6):475-80.  
53  
54  
55  
56  
57  
58  
59  
60

## Disentangling quality and safety indicator data: a longitudinal, comparative study of hand hygiene compliance and accreditation outcomes in 96 Australian hospitals

### Authors:

|                                                                   |
|-------------------------------------------------------------------|
| <b>Virginia Mumford</b><br>Doctoral Candidate <sup>1</sup>        |
| <b>David Greenfield</b><br>Associate Professor <sup>1</sup>       |
| <b>Anne Hogden</b><br>Research Fellow <sup>1</sup>                |
| <b>Deborah Debono</b><br>Doctoral Candidate <sup>1</sup>          |
| <b>Elena Gospodarevskaya</b><br>Health Economist <sup>2</sup>     |
| <b>Kevin Forde</b><br>Senior Lecturer <sup>3</sup>                |
| <b>Johanna Westbrook</b><br>Professor and Director <sup>2</sup>   |
| <b>Jeffrey Braithwaite</b><br>Professor and Director <sup>1</sup> |

### Affiliations:

- 1) Centre for Clinical Governance Research, Australian Institute of Health Innovation, UNSW, Sydney, Australia
- 2) Centre for Health Systems and Safety Research, Australian Institute of Health Innovation, UNSW, Sydney, Australia
- 3) School of Public Health and Community Medicine, UNSW, Sydney, Australia

### Contact details of corresponding author:

|                                                                                                                      |
|----------------------------------------------------------------------------------------------------------------------|
| <b>Dr Virginia Mumford</b>                                                                                           |
| <b>Business:</b> + 612 9385 3281                                                                                     |
| <b>Fax:</b> + 612 9663 8692                                                                                          |
| <b>Mobile:</b> + 61458 303 988                                                                                       |
| <b>Email:</b> v.mumford@unsw.edu.au                                                                                  |
| <b>Address:</b> Australian Institute of Health Innovation<br>Faculty of Medicine UNSW<br>Sydney, NSW 2052, Australia |

### Keywords:

Accreditation; Healthcare associated infection;  
Hand hygiene; Performance indicators.

### Manuscript data:

**Words in abstract:** 275  
**Words in body:** 3662  
**Tables:** 2  
**Figures:** 3  
**References:** 49

### Statements:

|                                                                                                                                                                                                                                                                                                                                                                                                                                                                                                                                                                                                                                                                                       |
|---------------------------------------------------------------------------------------------------------------------------------------------------------------------------------------------------------------------------------------------------------------------------------------------------------------------------------------------------------------------------------------------------------------------------------------------------------------------------------------------------------------------------------------------------------------------------------------------------------------------------------------------------------------------------------------|
| <p><b>Competing interests:</b> The authors have no competing interests to declare.</p> <p><b>Contributorship:</b> JB, DG, JW and VM contributed to the concept and design of the study. VM, JB and DG contributed to the acquisition of the data. VM wrote the draft of the manuscript. JB and DG provided a critical revision of the manuscript. VM and EG performed the data analysis, JB, EG, KF, AH, DD, and JW provided expert advice and reviewed the manuscript.</p> <p><b>Data sharing:</b> No additional data available.</p> <p><b>Ethics:</b> The University of New South Wales Human Research Ethics Committee has approved this project (approval number HREC 10274).</p> |
|---------------------------------------------------------------------------------------------------------------------------------------------------------------------------------------------------------------------------------------------------------------------------------------------------------------------------------------------------------------------------------------------------------------------------------------------------------------------------------------------------------------------------------------------------------------------------------------------------------------------------------------------------------------------------------------|



1  
2  
3  
4  
5  
6  
7 **Disentangling quality and safety indicator data: a longitudinal, comparative study of hand**  
8 **hygiene compliance and accreditation outcomes in 96 Australian hospitals**  
9

10  
11 **ABSTRACT**

12 **Objectives:** The study aims are twofold. First, to investigate the suitability of hand hygiene as an indicator of  
13 accreditation outcomes and, second, to test the hypothesis that hospitals with better accreditation outcomes  
14 achieve higher hand hygiene compliance rates.  
15

16  
17 **Design:** A retrospective, longitudinal, multi-site comparative survey.  
18

19 **Setting:** Acute public hospitals in New South Wales, Australia.  
20

21 **Participants:** 96 acute hospitals with accreditation survey results from two surveys during 2009-2012 and  
22 submitted data for more than four hand hygiene audits between 2010 and 2013.  
23

24 **Outcomes:** Our primary outcome comprised observational hand hygiene compliance data from eight audits  
25 during 2010 to 2013. The explanatory variables in our multilevel regression model included: accreditation  
26 outcomes and scores for the infection control standard; timing of the surveys; and hospital size and activity.  
27

28  
29 **Results:** Average hand hygiene compliance rates increased from 67.7% to 80.3% during the study period (2010  
30 to 2013), with 46.7% of hospitals achieving target compliance rates of 70% in audit 1, versus 92.3% in audit 8.  
31 Average hand hygiene rates at small hospitals were 7.8 percentage points (pp) higher than those at the largest  
32 hospitals ( $p < 0.05$ ). The association between hand hygiene rates, accreditation outcomes and infection control  
33 scores is less clear.  
34

35  
36 **Conclusions:** Our results indicate that accreditation outcomes and hand hygiene audit data are measuring  
37 different parts of the quality and safety spectrum. Understanding what is being measured when selecting  
38 indicators to assess the impact of accreditation is critical as focusing on accreditation results would discount  
39 successful hand hygiene implementation by smaller hospitals. Conversely, relying on hand hygiene results  
40 would discount the infection control related research and leadership investment by larger hospitals. Our  
41 hypothesis appears confounded by an accreditation program that makes it more difficult for smaller hospitals  
42 to achieve high infection control scores.  
43  
44  
45  
46  
47  
48  
49  
50  
51  
52  
53  
54  
55  
56  
57  
58  
59  
60

1  
2  
3  
4  
5  
6  
7 **Strengths and limitations of this study:**

- 8  
9  
10  
11  
12  
13  
14  
15  
16  
17  
18  
19  
20  
21  
22  
23  
24  
25  
26  
27  
28  
29  
30  
31  
32  
33  
34  
35  
36  
37  
38  
39  
40  
41  
42  
43  
44  
45  
46  
47  
48  
49  
50  
51  
52  
53  
54  
55  
56  
57  
58  
59  
60
- The main strengths of this study relates to the use of a comprehensive dataset involving the number of acute hospitals (96) participating in the accreditation process and the length of follow up over eight hand hygiene audit points and two accreditation cycles.
  - This study also addresses an important research question in terms of identifying and assessing the components of hospital accreditation and quantifying their inter-related benefits.
  - The results have important implications for health policy makers internationally in terms of designing health service accreditation programs [that accurately monitor a wide range of hospital size and type that can be accurately measured and monitored](#).
  - The main limitation was the lack of a control group as all hospitals in the survey were accredited. This meant it was not possible to assess direct or reverse causal relationships or to prevent omitted variable bias.
  - Other limitations include potential measurement error resulting from the use of self-reported hand hygiene data, however, the data collection methods adhered to World Health Organisation best practice guidelines.

## INTRODUCTION

Hospital accreditation programs are designed to set clinical and organisational standards, assess compliance with those standards, and strengthen quality improvement efforts. Accreditation is widely practised with national level accreditation agencies active in at least 27 countries.<sup>1</sup> The problems associated with measuring accreditation benefits are well documented.<sup>2,3</sup> A clear understanding of the inputs, in terms of costs and resource use, and outcomes, in terms of improved patient safety and quality, is essential in ensuring that accreditation programs are achieving their aims of improving patient safety and health care quality.<sup>4,5</sup> Measuring the effects of accreditation on clinical practice and quality of care is important as we need to determine whether the cost burden of data collection and audit processes is outweighed by the expected improvements in quality and safety outcomes.<sup>5</sup>

In this study we analyse the relationship between hand hygiene compliance rates and accreditation outcomes in order to test the suitability of hand hygiene as an indicator of accreditation outcomes. Our hypothesis is that hospitals with better accreditation outcomes and infection control scores than others, reflect organisational processes that support a positive culture toward improving quality and safety,<sup>6</sup> and therefore they would achieve higher hand hygiene compliance rates.

Hand hygiene assessment is an integral component of the infection control standards used to evaluate whether Australian hospitals are compliant with accreditation standards.<sup>7-9</sup> Hand hygiene compliance rates have been validated as a potential process indicator for accreditation outcomes. Moreover, health care associated infections are recognised as a leading cause of increased morbidity and health care costs.<sup>10</sup> A United States (US) study estimated there were 1.7 million healthcare associated infections in 2002, comprising 4.5% of admissions, and resulting in nearly 99,000 deaths.<sup>11</sup> A recent meta-analysis estimated the cost of the five most common healthcare associated infections at US\$9.8 billion per annum.<sup>12</sup> In Australia, the most recent figures available indicate that healthcare associated infections resulted in an extra two million bed days in 2005, with estimated additional costs of AU\$21 million from post-discharge surgical infections.<sup>13</sup>

There is increasing evidence that improving hand hygiene reduces healthcare associated infections and the spread of anti-microbial resistance.<sup>14-18</sup> However, it is difficult to demonstrate a causal link between hand hygiene and healthcare associated infections due to a multiplicity of interventions and scarcity of randomised trials.<sup>19-21</sup> Nevertheless, the World Health Organisation (WHO) has identified good hand hygiene as a major factor in reducing healthcare associated infections based on epidemiological evidence.<sup>18</sup>

Hand hygiene policies in Australian hospitals follow international best practices. They are based on WHO recommendations with a multimodal approach incorporating: access to cleaning agents at the point of care; training and education; monitoring and feedback; reminders in the workplace; and development of an institutional safety climate.<sup>22</sup> Auditors trained by Hand Hygiene Australia monitor hand hygiene activity by direct observation of hospital staff and compare hand hygiene activity against the total number of potential "moments" for hand hygiene.<sup>23</sup> The national target for hand hygiene compliance is 70% and audit results are

publicly reported three times a year. The Australian Commission on Safety and Quality in Health Care (ACSQHC) has recommended that hand hygiene programs need to be repeatedly monitored using both process indicators (compliance rates) and outcome indicators (infection rates).<sup>24</sup>

## METHODS

### Study design, setting and context

The study comprised a retrospective, longitudinal, multi-site comparative survey of hand hygiene compliance rates and accreditation outcomes in acute public hospitals in New South Wales (NSW), Australia. With a population of 7.2 million, NSW comprises 30.5% of the 736 public hospitals and 32.0% of the population in Australia.<sup>25</sup> We employed retrospective data matching techniques over the study period, 2009 to 2013, to analyse the relationship between hand hygiene compliance data and accreditation outcomes.

### Data matching and analysis

#### a) Hand hygiene compliance data

Hand hygiene policies include five “moments” when hand hygiene should be performed: before touching a patient; before a procedure; after a procedure or body fluid exposure risk; after touching a patient; and after touching a patient’s surroundings.<sup>23,26</sup> Audits are carried out three times a year by health care workers who have been accredited by Hand Hygiene Australia. Surveys are conducted using a standardised observation assessment tool which measures hand hygiene activity versus the total number of observed possible “moments”. Auditors are trained in selecting the wards or units for the audit, and the minimum number of required “moments” for each audit is determined by hospital size and activity. We obtained hand hygiene compliance rates data from late 2010 to early 2013 from the NSW Clinical Excellence Commission, the quality and safety body responsible for implementing the hand hygiene initiative in NSW and collecting hand hygiene audit data.<sup>27</sup>

#### b) Accreditation program and infection control standards

Data on accreditation outcomes from 2009 to 2013 were provided by the Australian Council on Healthcare Standards (ACHS). The ACHS Evaluation and Quality Improvement Program (EQuIP) was introduced in 1997 and comprises a four year cycle with external surveys in years two and four.<sup>28</sup> During these surveys, hospitals are assessed by an external team of surveyors against ACHS developed standards. The EQuIP program has undergone several revisions, none of which materially affected this study. Our study period included EQuIP4 which was introduced in 2007 and used for the surveys in 2009 and 2010, and EQuIP5 which was introduced in 2011. Accreditation standards were changed significantly following the introduction of national mandatory standards in 2013,<sup>9</sup> but the infection control criteria were the same for both versions of the EQuIP standards assessed during the study period (see supplementary file 1) . Surveyors scored facilities on a five point Likert scale for each standard or criterion assessed in the survey. Scores were designated as Outstanding Achievement (OA), Extensive Achievement (EA), Moderate Achievement (MA), Some Achievement, and (LA

1  
2  
3  
4  
5  
6  
7 Little Achievement. Hospitals needed to achieve OA, EA or MA, scores in each mandatory standard or criterion  
8 in order to meet accreditation requirements.

9  
10 Infection control related criteria were part of a broader standard regarding the safe provision of care and  
11 services.<sup>7,8</sup> To meet accreditation requirements, hospitals needed to ensure that the infection control policy:  
12 met all regulatory requirements and industry guidelines; had executive support; incorporated ongoing  
13 education activities; and, included indicators to show both compliance with the policy and effective outcome  
14 measurements. Additional activities which counted towards achieving higher (EA and OA) scores included:  
15 benchmarking of performance indicators; use of feedback to inform and improve; contributing to infection  
16 control research; and, recognised leadership in infection control systems.<sup>7,8</sup> Accreditation is often granted to a  
17 cluster of facilities within a local health district and therefore reflects conditions at all the facilities within that  
18 survey group. These clusters are subject to boundary changes, as seen in the NSW 2011 health system re-  
19 organisation, which took place during the study period.<sup>29</sup> We therefore identified the different hospitals  
20 within each cluster in order to match the accreditation scores with the hand hygiene data from individual  
21 hospitals.  
22  
23  
24

#### 25 26 **Study Variables**

27  
28 To analyse the matched data we used hand hygiene compliance rates as our outcome of interest, expressed as  
29 a continuous outcome variable. Data were available at eight different time points from the end of 2010 to  
30 early 2013 (see Figure 1). We characterised the accreditation scores as either full or partial accreditation.  
31 Partial accreditation was defined as either accreditation being granted for a reduced time, or resulting in a  
32 recommendation for action. No hospitals in the study were refused accreditation during the study period. We  
33 included infection control scores in the model by whether hospitals achieved a higher score in one, none (our  
34 reference case) or both surveys. To test for a possible timing effect we included a variable to identify whether  
35 surveys were either carried out in the 2009 and 2011 accreditation cycle (cycle=0), or the 2010 and 2012 cycle  
36 (cycle=1).  
37  
38  
39

#### 40 **Figure 1: Timeline of accreditation surveys and hand hygiene audits**

41  
42 <<<Insert Figure 1 here>>>

43  
44 Acute hospitals were grouped according to the Australian Institute of Health and Welfare activity matrix,  
45 based on annual numbers of acute episodes of care adjusted for patient complexity, and geographic location  
46 (see supplementary file 2).<sup>30</sup> We used these groups to create a categorical variable with principal referral and  
47 specialist hospitals as the reference case (principal=0), with large hospitals scored as 1, medium hospitals as 2,  
48 and small hospitals as 3.  
49  
50

#### 51 **Analysis**

52  
53 The nature of the data, with irregular audit dates and clustering within hospitals, indicated that a multilevel  
54 model would be the most appropriate and would allow adjustment for hospital level variance.<sup>31,32</sup> After  
55  
56  
57  
58  
59  
60

1  
2  
3  
4  
5  
6  
7 matching the accreditation and hand hygiene data our sample comprised 96 hospitals each with two  
8 accreditation surveys. For some hospitals we were not able to match the accreditation outcomes because of  
9 changes in the accreditation clusters. Missing data were higher during the first two audits whilst the program  
10 was progressively implemented. We did not impute values for missing data as the pattern of missing results  
11 indicated these were not missing at random. For example, data from some of the smaller hospitals were not  
12 included as they did not meet the minimum publication requirements during the study period (50 moments of  
13 hand hygiene), which we determined was likely to be related to hospital size.  
14  
15

16 We tested our main model using hand hygiene data from audits 1 through 8 as the outcome variable, and  
17 accreditation outcomes, infection control scores, accreditation cycle, and peer groups as our explanatory  
18 variables. We tested the model fit versus ordinary least squares by calculating the intra-class correlation to  
19 assess the within-hospital effect. We also tested whether to use a random co-efficient or random intercept  
20 model. Analysis was conducted using Stata statistical software (version 12SE),<sup>33</sup> applying a two-sided  
21 significance level of 5%. We also fitted a restrictive model using data from audits 3 to 8 to determine whether  
22 the different peer group mix in the first two surveys was affecting the results.  
23  
24

## 25 RESULTS

### 26 Hand hygiene and accreditation data analysis

27  
28 We assessed hand hygiene data on 118 hospitals from eight different audit points during 2010 to 2013.  
29 Overall, hand hygiene rates showed an improvement during the study period, with 28 out of 60 hospitals  
30 (46.7%) achieving 70% compliance rates in the first audit in 2010 versus 108 out of 117 hospitals (92.3%) in  
31 the final audit, in early 2013. Average hand hygiene compliance rates increased from 67.7% in audit 1, to  
32 80.3% in audit 8, and remained above the 70% national target rate from audit 2 onwards. The average audit  
33 compliance rates by audit and hospital peer group are shown in Figure 2.  
34  
35

36  
37  
38 **Figure 2:** Mean hand hygiene compliance rates by audit and hospital peer group, 2010-2013<<<Insert Figure 2  
39 here>>>

40  
41 During the study period, 2009-2013, 61 hospitals underwent an accreditation survey in cycle 0, and 44 in cycle  
42 1. The accreditation outcomes showed that 59% of organisations were granted full accreditation in the first  
43 survey in each cycle (during 2009-10) versus 77% in the second survey (2011-12). The number of hospitals  
44 receiving higher infection control scores also increased over time, with 13% receiving a higher score (EA) in the  
45 first survey of each accreditation cycle versus 18% in the second surveys during 2011 and 2012. No hospitals  
46 received an OA score for infection control during the study period. We further examined whether there was a  
47 difference between meeting, or not meeting, the target compliance rates by comparing the partial data from  
48 audit 1 when the program was being rolled out, and the final audit in our study, audit 8 (see Figure 3). Large  
49 hospitals showed the biggest increase, with 30% meeting the target in audit 1, rising to 100% by audit 8.  
50  
51

52  
53 **Figure 3:** Percentage of hospitals meeting hand hygiene targets by audit and hospital peer group  
54  
55

<<<Insert Figure 3 here>>>

We also noted that principal and large hospitals comprised 51.7% of hospitals in audit 1 versus 39.3% in audit 8, suggesting they were early adopters in the program. We tested whether this would influence the results using the restricted model (comprising data from audits 3 to 8). The infection control outcomes also improved over time with 3% of organisations receiving high scores in both surveys in cycle 0 versus 17% in cycle 1, however, we note the absolute small numbers involved (n=8). A size effect was noted with 6.5% (n=2) of smaller hospitals receiving a higher infection control score in [at least one one or both surveys](#) versus 35.7% (n=10) of principal and 46.2% (n=6) of large hospitals (see Table 1).

**Table 1: Summary characteristics of accreditation and infection control scores**

| <i>Table 1: Summary of accreditation and infection control scores, breakdown by peer group and timing of surveys</i> |                            |              |               |              |
|----------------------------------------------------------------------------------------------------------------------|----------------------------|--------------|---------------|--------------|
|                                                                                                                      | <b>Hospital Peer Group</b> |              |               |              |
|                                                                                                                      | <i>Principal</i>           | <i>Large</i> | <i>Medium</i> | <i>Small</i> |
|                                                                                                                      | <i>N=28</i>                | <i>N=13</i>  | <i>N=24</i>   | <i>N=31</i>  |
| <b>Full accreditation on both surveys</b>                                                                            | 57.1%                      | 61.5%        | 33.3%         | 3.2%         |
| <b>Full accreditation in cycle 0 (surveys in 2009 and 2011)</b>                                                      | 58.8%                      | 62.5%        | 21.4%         | 0.0%         |
| <b>Full accreditation in cycle 1 (surveys in 2010 and 2012)</b>                                                      | 54.5%                      | 60.0%        | 50.0%         | 10.0%        |
| <b>Higher IC scores in one survey</b>                                                                                | 25.0%                      | 30.8%        | 8.3%          | 3.2%         |
| <b>Higher IC scores in both surveys</b>                                                                              | 10.7%                      | 15.4%        | 8.3%          | 3.2%         |
| <b>Higher IC scores in either survey</b>                                                                             | <b>35.7%</b>               | <b>46.2%</b> | <b>16.7%</b>  | <b>6.5%</b>  |
| <b>Higher IC scores in cycle 0 (surveys in 2009 and 2011)</b>                                                        | 29.4%                      | 25.0%        | 7.1%          | 0.0%         |
| <b>Higher IC scores in second survey of each cycle (2011 or 2012)</b>                                                | 45.5%                      | 80.0%        | 30.0%         | 20.0%        |
| <b>IC=infection control</b>                                                                                          |                            |              |               |              |
| <b>Peer group as defined by the Australian Institute of Health and Welfare<sup>30</sup></b>                          |                            |              |               |              |

Formatted Table

### Testing the model

The intra-class correlation co-efficient indicated that 38% of the variance was due to within-hospital effects, indicating sufficient variance for using a random intercept model.<sup>32</sup> We ran a likelihood ratio test using a null model (without the random intercept). This gave a chi-squared test result of 190 (p=0.001), which confirmed our approach versus using ordinary least squares. We also tested the model using infection control scores as a random co-efficient, but the results (chi squared= 0.81, p=0.67) indicated that the random intercept model was more appropriate. We noted a ceiling effect in our data with 100% of large hospitals and 92% of all hospitals meeting the target compliance rates by audit 8, with less incentive to reach higher levels (see Figure 3). Although hospitals were incrementally enrolled in the hand hygiene program, the lack of hand hygiene compliance data in the un-enrolled hospitals meant we were not able to use a stepped wedge design to

provide controls, or evaluate a before and after effect and our results are also subject to omitted variable bias. A fixed effects panel data model might be a more traditional approach to reduce sample variation, but we determined that the random intercept model would be more appropriate due to the policy requirement for all public hospitals to submit hand hygiene data, and the presence of time-invariant variables.<sup>34</sup>

### Multilevel model

After matching the hand hygiene data with hospitals that underwent two accreditation surveys, our main model included data from 661 hand hygiene audits from 96 hospitals, an average of 6.9 audits per hospital. The results (Table 2) show that achieving full accreditation for both surveys was not significantly associated with higher hand hygiene rates versus those hospitals achieving full accreditation in only one survey. The association between hand hygiene rates and infection control scores is less clear. Hospitals achieving higher infection control scores (EA) in one survey (n=14) showed 4.2 percentage point (pp) lower hand hygiene rates than hospitals who just met the accreditation standard (MA score), and this result was significant (p=0.033). Hospitals achieving higher infection control scores in both surveys (n=8) showed higher rates (2.1 pp) but this was not significant (p=0.40). Small and medium sized hospitals experienced significantly higher hand hygiene compliance rates (7.8 pp for small hospitals and 3.5 pp for medium hospitals) compared to principal hospitals. The restricted model, using data from audit 3 onwards, also showed a negative relationship between higher infection control scores and hand hygiene audit results. However, the effect was smaller (2.9 pp) and the results were no longer significant (p=0.14). The size effect in the restricted model was consistent with the main model, with small and medium hospitals showing significantly higher hand hygiene rates than principal referral hospitals. These results do not lend support to our study hypothesis that higher infection control scores are associated with higher hand hygiene rates.

**Table 2: Multilevel model to show effect of accreditation outcomes on hand hygiene audit rates**

| Table 2 - Multilevel model showing association of accreditation outcomes on hand hygiene compliance rates |                         |                |                 |                               |                |                 |
|-----------------------------------------------------------------------------------------------------------|-------------------------|----------------|-----------------|-------------------------------|----------------|-----------------|
| Variables                                                                                                 | Main Model (audits 1-8) |                |                 | Restricted Model (audits 3-8) |                |                 |
|                                                                                                           | Mean values             | Standard error | <i>p</i> values | Mean values                   | Standard error | <i>p</i> values |
| Full accreditation in both surveys                                                                        | 0.004                   | 0.016          | 0.809           | 0.0077                        | 0.016          | 0.620           |
| Higher infection control scores in one survey                                                             | -0.042                  | 0.020          | 0.033           | -0.029                        | 0.020          | 0.135           |
| Higher infection control scores in two surveys                                                            | 0.021                   | 0.025          | 0.404           | 0.033                         | 0.024          | 0.172           |
| Later cycle (surveys in 2010/2012)                                                                        | 0.024                   | 0.014          | 0.073           | 0.0205                        | 0.013          | 0.123           |



|                                                                                              |              |              |                  |               |              |                  |
|----------------------------------------------------------------------------------------------|--------------|--------------|------------------|---------------|--------------|------------------|
| <b>Hospital peer group* (principal referral=0)</b>                                           |              |              |                  |               |              |                  |
| <b>Large</b>                                                                                 | 0.024        | 0.020        | 0.247            | 0.0233        | 0.023        | 0.244            |
| <b>Medium</b>                                                                                | <b>0.035</b> | <b>0.017</b> | <b>0.046</b>     | <b>0.0343</b> | <b>0.034</b> | <b>0.045</b>     |
| <b>Small</b>                                                                                 | <b>0.078</b> | <b>0.018</b> | <b>&lt;0.001</b> | <b>0.0807</b> | <b>0.081</b> | <b>&lt;0.001</b> |
| <b>Number of observations</b>                                                                | 661          |              |                  | 563           |              |                  |
| <b>Number of hospitals</b>                                                                   | 96           |              |                  | 96            |              |                  |
| <b>Average compliance rates</b>                                                              | 0.741        |              |                  | 0.744         |              |                  |
| <b>Log likelihood</b>                                                                        | 662          |              |                  | 634           |              |                  |
| <b>*Peer group as defined by the Australian Institute of Health and Welfare<sup>30</sup></b> |              |              |                  |               |              |                  |

## DISCUSSION

Our analysis of 118 NSW hospitals showed that hand hygiene rates increased from 67.7% in audit 1 in late 2010 to 80.3% by audit 8 in early 2013. This compares to rates of 62.2% from a sample of NSW hospitals in February 2007 which were observed following the introduction of the Clean Hand Saves Lives campaign during 2006-2007,<sup>15</sup> and continues the improvement shown nationally in Australia with average hand hygiene rates estimated at 68.3% in 2011.<sup>35</sup> It is challenging to compare these results internationally. A US study estimated average hand hygiene rates of 56.6% in 40 hospitals using data collected for one year before and after the introduction of national hand hygiene guidelines in 2002.<sup>36</sup> However, it must be noted that this program was different to that followed by Hand Hygiene Australia and so the results would not be directly comparable.

Smaller hospitals in our study had higher hand hygiene compliance rates but the relationship between accreditation outcomes and hand hygiene data was less clear. This hospital size effect on hand hygiene compliance has been confirmed by other research investigating the link between hand hygiene rates and health care associated *Staphylococcus aureas* bacteraemia.<sup>37 38</sup> We consider the results from small and medium hospitals in our study can be explained by looking at the organisational infrastructure necessary to meet the hand hygiene and accreditation requirements. Both are dependent on a widespread organisational response in terms of education, monitoring, infrastructure and management involvement.<sup>5</sup> Achieving higher infection control scores requires additional benchmarking, feedback and research capabilities.<sup>7 8</sup> The organisational size effect suggests that small and medium sized hospitals can effectively embrace multimodal quality improvement strategies as seen by the higher compliance rates. However, the requirements for achieving high infection control scores within an accreditation survey may be measuring different aspects of quality that are not reflected in the hand hygiene compliance rates. The results indicate that smaller hospitals are able to focus on the practical implementation of a national hand hygiene policy. Having the resources to meet the requirements for higher infection control scores, in terms of conducting research or being recognised leaders in infection control, may not be practical for these smaller organisations. Although some smaller hospitals will be accredited as part of a larger cluster of hospitals, which includes principal and large

1  
2  
3  
4  
5  
6  
7 hospitals, this is not always the case. Our hypothesis that higher accreditation scores would be reflected in  
8 hand hygiene rates appears to be confounded by an accreditation program that makes it more difficult for  
9 smaller hospitals to achieve high infection control scores.

10  
11 This study uses one indicator for evaluating accreditation whereas multiple measures may be more effective.<sup>39</sup>  
12 For example, outcome indicators are widely used in the US hospital system,<sup>40-42</sup> and include hospital acquired  
13 SAB rates and surgical site infection rates. These incorporate a broader mix of the anti-microbial, hand  
14 hygiene, and specialist cleaning practice modules of the infection control standard. Using outcome indicators  
15 would complete Donabedian's triad of performance measures to include structural (accreditation results),  
16 process (hand hygiene compliance rates) and outcome (*Staphylococcus aureus* infection rates) measures.<sup>43,44</sup>

17  
18  
19 Measurement issues in our study include a possible observer effect since the hospital staff might be aware the  
20 audit was taking place. However, although this may increase the compliance rate, the results would still be  
21 valid as the standards include requirements for staff education and installation of appropriate infrastructure.  
22 Increased rates during an audit imply that the correct infrastructure is in place, in terms of availability of  
23 functioning hand washing stations, and that staff are aware of the hand hygiene policies. In addition, any  
24 observer effect is likely to be mitigated as all the hospitals used the same methods for collecting data and thus  
25 are equally subjected to this bias. Other methods to measure hand hygiene activity include measuring  
26 consumption rates of hand hygiene products, such as alcohol rubs,<sup>45</sup> and electronic systems for monitoring  
27 compliance,<sup>46</sup> but WHO guidelines suggest direct observation is still the gold standard.<sup>40</sup> We also note that  
28 although accreditation surveys are assessed on a five point scale, only two scores (MA and EA) were used in  
29 the infection control standard during the four surveys in our study. The lack of granularity in the accreditation  
30 scores makes it difficult to differentiate accreditation performance. Inter-surveyor reliability is recognised as a  
31 limitation of audit systems that are based on subjective assessments.<sup>47</sup> To reduce idiosyncratic scoring, ACHS  
32 surveyors need to provide evidence to ACHS for their scoring methods, and in the decision to award higher  
33 scores, but some variation between surveyors may remain.

34  
35  
36  
37  
38  
39 Limitations of the model include reverse causality in that higher compliance rates could lead to higher  
40 infection control scores at the next survey where hand hygiene audit rates are used as evidence of  
41 implementation during an accreditation survey. This would likely be the case going forward as ACSQHC  
42 includes hand hygiene audit results as part of the evidence of implementation of standard 3 under the new  
43 national standards.<sup>9,48</sup>

#### 44 45 46 **Implications**

47  
48 Different indicators will give different perspectives on how an organisation approaches and implements  
49 relevant policy. However, the costs of measurement in health care should be balanced against using a range of  
50 indicators to capture a broader mix of infection control policies, and across the different standards assessed  
51 during accreditation surveys. Indicator selection should include both process indicators, recognised as a  
52 method of measuring organisational changes,<sup>49</sup> and outcome indicators. Public reporting of indicator data  
53  
54

1  
2  
3  
4  
5  
6  
7 further increases the requirement to accurately identify and measure the parts of the patient safety and  
8 quality spectrum that are being addressed. In this study, a focus on the accreditation results would  
9 underestimate the successful implementation of the hand hygiene policy by smaller hospitals. Conversely, just  
10 using hand hygiene results would underestimate the research and leadership investment in infection control  
11 by larger hospitals. Disentangling these two outcomes within the same safety and quality initiative is a pre-  
12 requisite to understanding how they can be effectively assessed and monitored. For example, consideration  
13 could be given to changing criteria for awarding higher scores for infection control such that achieving higher  
14 scores was evidence based and could be feasible for all hospitals. [Although we focus on Australian hospitals in  
15 our study, international accreditation programs will also need to ensure that indicators accurately capture  
16 outcomes and reflect performance across a range of hospital size and type.](#)  
17  
18  
19

## 20 21 22 CONCLUSION

23  
24 Identifying indicators to measure the effectiveness of accreditation is challenging due to the complexity of  
25 implementing a wide range of accreditation related processes across multiple hospital activities. Our results  
26 do not support our study hypothesis that higher infection control scores are associated with higher hand  
27 hygiene rates. Instead, this study suggests that accreditation outcomes and hand hygiene audit data measure  
28 different parts of the quality and safety spectrum. Developing a framework to identify suitable indicators is an  
29 important contribution to understanding the impact of hospital accreditation internationally. Policy makers  
30 need to appreciate the assumptions behind the choice of indicator and understand exactly what is being  
31 measured to ensure that key performance indicators encourage quality improvements in the delivery of  
32 hospital services.  
33  
34  
35

## 36 ACKNOWLEDGMENTS, COMPETING INTERESTS, and FUNDING

37  
38 **Acknowledgements:** This study forms part of the Accreditation Collaborative for the Conduct of Research,  
39 Evaluation and Designated Investigations through Teamwork (ACCREDIT) project. The ACCREDIT collaboration  
40 involves researchers in the Centre for Clinical Governance Research and Centre for Health Systems and Safety  
41 Research in the Australian Institute of Health Innovation at the University of New South Wales, Australia. The  
42 ACCREDIT research team benefits from a high-profile international advisory group containing researchers in  
43 health safety and quality from the United Kingdom, Spain and Sweden. The collaboration includes two leading  
44 health safety and quality bodies (ACSQHC and the NSW Clinical Excellence Commission) plus three of the  
45 major Australian health services accreditation agencies: ACHS, Australian General Practice Accreditation  
46 Limited, and the Australian Aged Care Quality Agency. The authors would like to thank ACHS and the NSW  
47 Clinical Excellence Commission for providing data for the study. The authors would also like to acknowledge  
48 the [feedback received on the first draft of the paper](#) help and encouragement received from the PhD group at  
49 the Centre for Health Economics Research and Evaluation at the University of Technology Sydney, in  
50 particular: Prof. Marion Haas; Dr. Rebecca Reeve; and Ms. Bonny Parkinson.  
51  
52  
53  
54  
55  
56  
57  
58  
59  
60

1  
2  
3  
4  
5  
6  
7 **Competing interests:** None declared

8  
9 **Funding:** This research is supported by the National Health and Medical Research Council Program Grant  
10 568612, and under the Australian Research Council's Linkage Projects scheme (project LP100200586). Industry  
11 partners (ACHS, Australian General Practice Accreditation Limited, and the Australian Aged Care Quality  
12 Agency) contributed to the project design and may provide assistance with its implementation. They may also  
13 contribute to data analysis, interpretation of findings and presentation of results, but have no role in the  
14 design and conduct of the study. Final decision making responsibility for all research activities, including the  
15 decision to submit research for publication, resides with UNSW.  
16

17  
18 **Ethics:** Human Research Ethics Committee approval for this study was granted by UNSW (approval number  
19 HREC 10274).  
20

21  
22 **Figure Legends**

23  
24 Figure 1: Timeline of accreditation surveys and hand hygiene audits

25  
26 Figure 2: Mean hand hygiene compliance rates by audit and hospital peer group, 2010-2013

27  
28 Figure 3: Percentage of hospitals meeting hand hygiene targets by audit and hospital peer group  
29  
30  
31  
32  
33  
34  
35  
36  
37  
38  
39  
40  
41  
42  
43  
44  
45  
46  
47  
48  
49  
50  
51  
52  
53  
54  
55  
56  
57  
58  
59  
60

## REFERENCES

1. Shaw CD, Braithwaite J, Moldovan M, *et al.* Profiling health-care accreditation organizations: an international survey. *International Journal for Quality in Health Care* 2013.
2. Mumford V, Forde K, Greenfield D, *et al.* Health services accreditation: what is the evidence that the benefits justify the costs? *International Journal for Quality in Health Care* 2013;first published online August 13.
3. Groene O, Botje D, Suñol R, *et al.* A systematic review of instruments that assess the implementation of hospital quality management systems. *International Journal for Quality in Health Care* 2013;25(5):525-41.
4. Australian Commission on Safety and Quality in Health Care. *Australian Safety and Quality Framework for Health Care, Putting the Framework into action: getting started.* Sydney: ACSQHC, 2011.
5. van Harten WH, Casparie TF, Fisscher OAM. Methodological considerations on the assessment of the implementation of quality management systems. *Health Policy* 2000;54(3):187-200.
6. Braithwaite J, Greenfield D, Westbrook J, *et al.* Health service accreditation as a predictor of clinical and organisational performance: a blinded, random, stratified study. *Quality & Safety in Health Care* 2010;19(1):14-21.
7. Australian Council on Healthcare Standards. *The ACHS EQUiP 4 guide : part 2 – standards.* Ultimo: ACHS, 2007.
8. Australian Council on Healthcare Standards (ACHS). *EQUIP5 standards and criteria.* Ultimo: ACHS, 2010.
9. Australian Commission on Safety and Quality in Health Care (ACSQHC). *National safety and quality health service standards.* Sydney: ACSQHC, 2012.
10. Productivity Commission. *Public and private hospitals: research report.* Canberra: Productivity Commission, 2009.
11. Klevens RM, Edwards JR, Richards C, *et al.* Estimating health care-associated infections and deaths in U.S. hospitals (2002). *Public Health Reports* 2007;122(2):160-66.
12. Zimlichman E, Henderson D, Tamir O, *et al.* Health care-associated infections: a meta-analysis of costs and financial impact on the US health care system. *JAMA Internal Medicine* 2013;173(22):2039-46.
13. Graves N, Weinhold D, Tong E, *et al.* Effect of healthcare-acquired infection on length of hospital stay and cost. *Infection Control and Hospital Epidemiology* 2007;28(3):280-92.
14. Pittet D, Allegranzi B, Sax H, *et al.* Evidence-based model for hand transmission during patient care and the role of improved practices. *The Lancet Infectious Diseases* 2006;6(10):641-52.
15. Grayson ML, Jarvie LJ, Martin R, *et al.* Significant reductions in methicillin-resistant *Staphylococcus aureus* bacteraemia and clinical isolates associated with a multisite, hand hygiene culture-change program and subsequent successful statewide roll-out. *Medical Journal of Australia* 2008;188(11):633-40.
16. Pincock T, Bernstein P, Warthman S, *et al.* Bundling hand hygiene interventions and measurement to decrease health care-associated infections. *American Journal of Infection Control* 2012;40(4 SUPPL.):S18-S27.

17. Johnson P, Martin R, Burrell LJ, *et al.* Efficacy of an alcohol/chlorhexidine hand hygiene program in a hospital with high rates of nosocomial methicillin-resistant *Staphylococcus aureus* (MRSA) infection. *Medical Journal of Australia* 2005;183 (10):509-14.
18. World Health Organization. *WHO guidelines on hand hygiene in health care: a summary. First global patient safety challenge - clean care is safer care.* Geneva, Switzerland: World Health Organisation, 2009.
19. Gould DJ, Moralejo D, Drey N, *et al.* Interventions to improve hand hygiene compliance in patient care. *Cochrane Database of Systematic Reviews (Online)* 2010(9).
20. Backman C, Zoutman DE, Marck PB. An integrative review of the current evidence on the relationship between hand hygiene interventions and the incidence of health care-associated infections. *American Journal of Infection Control* 2008;36(5):333-48.
21. ACSQHC. *Surveillance of Healthcare Associated Infections: Staphylococcus aureus bacteraemia & Clostridium difficile infection - Version 4.0.* Sydney: Australian Commission for Safety and Quality in Health Care, 2012.
22. World Health Organization. *A guide to the implementation of the WHO multimodal hand hygiene improvement strategy.* Geneva: WHO, 2009.
23. Hand Hygiene Australia. *Hand Hygiene Australia manual: 5 moments for hand hygiene. 3rd Edition.* Heidelberg, VIC: Commonwealth of Australia, 2013.
24. Grayson L, Hunt C, Johnson P, *et al.* Hand hygiene. In: Cruickshank M, Ferguson J, editors. *Reducing harm to patients from health care associated infection: the role of surveillance.* Sydney: Australian Commission for Safety and Quality in Health Care, 2008.
25. Australian Institute of Health and Welfare. *Australian hospital statistics 2011–12. Health services series no. 50. Cat. no. HSE 134.* Canberra: AIHW, 2013.
26. ACSQHC. *Australian guidelines for the prevention and control of infection in healthcare.* Canberra: Australian Government, NHMRC & the Australian Commission on Safety and Quality in Healthcare, 2010.
27. Clinical Excellence Commission. *Clinical Excellence Commission Strategic Plan 2012 - 2015.* Sydney: CEC, 2012.
28. Australian Council on Healthcare Standards. *National report on health services accreditation performance 2003-2006.* Ultimo: ACHS, 2007.
29. Commonwealth of Australia. *National health reform: progress and delivery.* Canberra: Department of Health and Ageing, 2011.
30. Independent Hospital Pricing Authority. *National hospital cost data collection, Australian public hospitals cost report 2010-2011, round 15.* Sydney: IHPA, 2013.
31. Garson D. Fundamentals of hierarchical linear and multilevel modeling. In: Garson D, editor. *Hierarchical linear modeling: guide and applications:* Sage Publications Inc., 2013:3-25.
32. Rabe-Hesketh S, Skrondal A. *Multilevel and longitudinal modelling using stata.* 3rd ed. College Station: Stata Press, 2012.
33. Stata Statistical Software: Release 12 [program]. College Station, TX: StataCorp LP., 2011.

- 1  
2  
3  
4  
5  
6  
7 34. Allison PD. Using panel data to estimate the effects of events. *Sociological Methods & Research*  
8 1994;23(2):174-99.
- 9 35. Grayson ML, Russo PL, Cruickshank M, *et al*. Outcomes from the first 2 years of the Australian National  
10 Hand Hygiene Initiative. *Med J Aust* 2011;195(10):615-19.
- 11 36. Larson EL, Quiros D, Lin SX. Dissemination of the CDC's Hand Hygiene Guideline and impact on infection  
12 rates. *American Journal of Infection Control* 2007;35:666-75.
- 13 37. Playford EG, McDougall D, McLaws M-L. Problematic linkage of publicly disclosed hand hygiene compliance  
14 and health care-associated Staphylococcus aureus bacteraemia rates. *Medical Journal of Australia*  
15 2012;197(1): 29 - 30.
- 16 38. Australian Commission on Safety and Quality in Health Care. *National core, hospital-based outcome*  
17 *indicator specification, Version 1.1 - CONSULTATION DRAFT*. Sydney: ACSQHC, 2012.
- 18 39. Brown C, Hofer T, Johal A, *et al*. An epistemology of patient safety research: a framework for study design  
19 and interpretation. Part 1. Conceptualising and developing interventions. *Quality and Safety in Health Care*  
20 2008;17(3):158-62.
- 21 40. The World Health Organization. *Automated/electronic systems for hand hygiene monitoring: a systematic*  
22 *review* Geneva, Switzerland: WHO, 2013.
- 23 41. The Joint Commission. *Improving America's hospitals: The Joint Commission's annual report on quality and*  
24 *safety*, 2013.
- 25 42. Agency for Healthcare Research and Quality. *AHRQ quality indicators: inpatient quality indicators*.  
26 Rockville: AHRQ, 2012.
- 27 43. Donabedian A. The Quality of Care: How Can It Be Assessed? *JAMA Internal Medicine* 1988;260(12):1743-  
28 48.
- 29 44. Mountford J, Shojania KG. Refocusing quality measurement to best support quality improvement: local  
30 ownership of quality measurement by clinicians. *BMJ Quality & Safety* 2012;21(6):519-23.
- 31 45. Behnke M, Gastmeier P, Geffers C, *et al*. Establishment of a national surveillance system for alcohol-based  
32 hand rub consumption and change in consumption over 4 years. *Infection Control and Hospital*  
33 *Epidemiology* 212;33(6):618-62.
- 34 46. Boyce JM. Measuring healthcare worker hand hygiene activity: current practices and emerging  
35 technologies. *Infection Control and Hospital Epidemiology* 2011;32(10):1016-28.
- 36 47. Greenfield D, Pawsey M, Naylor J, *et al*. Are healthcare accreditation surveys reliable? *International Journal*  
37 *of Health Care Quality Assurance* 2009;22(2):105-16.
- 38 48. Australian Commission on Safety and Quality in Health Care. *Safety and quality improvement guide,*  
39 *standard 3: preventing and controlling healthcare associated infections*. Sydney: ACSQHC, 2012.
- 40 49. Mant J. Process versus outcome indicators in the assessment of quality of health care. *International*  
41 *Journal for Quality in Health Care* 2001;13(6):475-80.
- 42  
43  
44  
45  
46  
47  
48  
49  
50  
51  
52  
53  
54  
55  
56  
57  
58  
59  
60

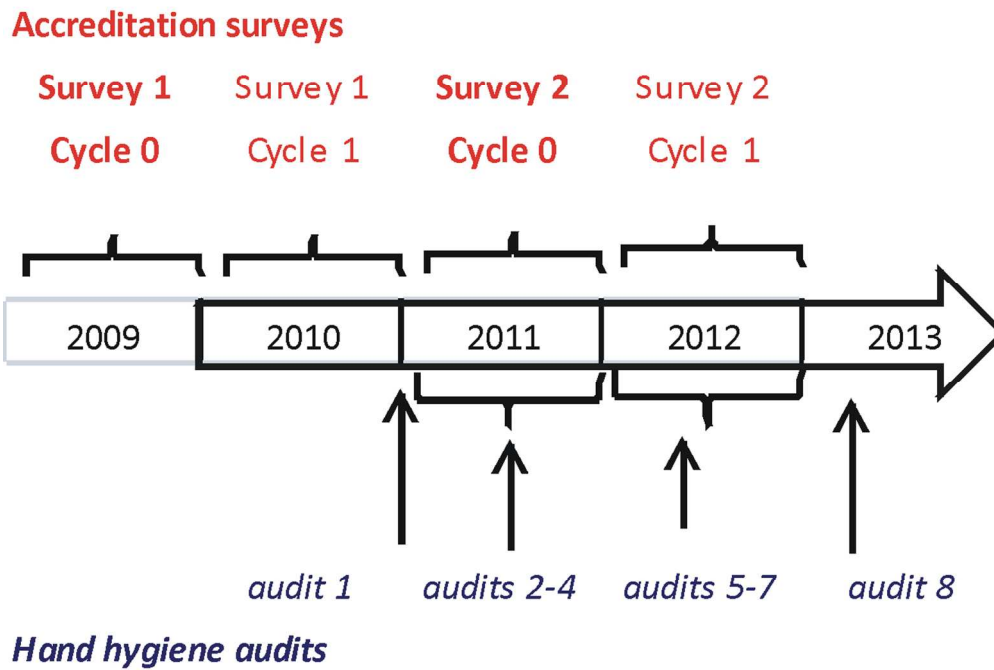

Figure 1: Timeline of accreditation surveys and hand hygiene audits

Review only

1  
2  
3  
4  
5  
6  
7  
8  
9  
10  
11  
12  
13  
14  
15  
16  
17  
18  
19  
20  
21  
22  
23  
24  
25  
26  
27  
28  
29  
30  
31  
32  
33  
34  
35  
36  
37  
38  
39  
40  
41  
42  
43  
44  
45  
46  
47  
48  
49  
50  
51  
52  
53  
54  
55  
56  
57  
58  
59  
60



1  
2  
3  
4  
5  
6  
7  
8  
9  
10  
11  
12  
13  
14  
15  
16  
17  
18  
19  
20  
21  
22  
23  
24  
25  
26  
27  
28  
29  
30  
31  
32  
33  
34  
35  
36  
37  
38  
39  
40  
41  
42  
43  
44  
45  
46  
47  
48  
49  
50  
51  
52  
53  
54  
55  
56  
57  
58  
59  
60

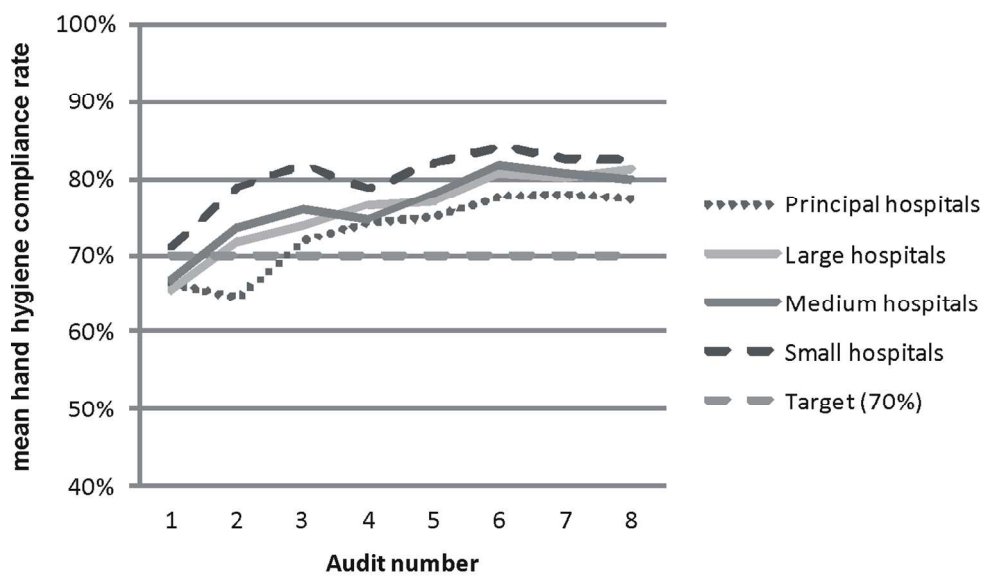

Figure 2: Mean hand hygiene compliance rates by audit and hospital peer group, 2010-2013

review only

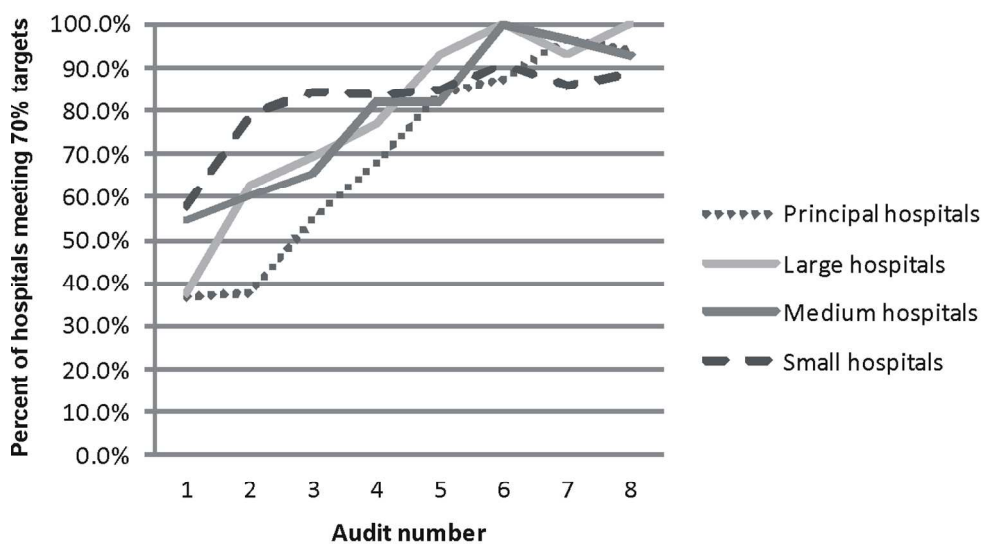

Figure 3: Percentage of hospitals meeting hand hygiene targets by audit and hospital peer group

review only

| <b>Mandatory criteria assessed during EQUIP 4 &amp; 5 surveys</b>                                                                            |
|----------------------------------------------------------------------------------------------------------------------------------------------|
| Care is planned and delivered in collaboration with the consumer/patient and when relevant, the carer, to achieve the best possible outcomes |
| Consumers/patients are informed of the consent process, and they understand and provide consent for their care                               |
| Outcomes of clinical care are evaluated by healthcare providers, and where appropriate, are communicated to the consumer/patient             |
| Processes for clinical handover, transfer of care and discharge, address the needs of the consumer/patient for ongoing care                  |
| The health record ensures comprehensive and accurate information is collaboratively gathered, recorded, and used in care delivery            |
| Medications are managed to ensure safe and effective consumer/patient outcomes                                                               |
| <b>The infection control system supports safe practice and ensures a safe environment for consumers/patients and healthcare workers</b>      |
| The organisation's continuous quality improvement system demonstrates its commitment to improving the outcomes of care and service delivery  |
| The integrated organisation-wide risk management framework ensures that corporate and clinical risks are identified, minimised, and managed  |
| Healthcare incidents are managed to ensure improvements to the systems of care                                                               |
| Processes for credentialling and defining the scope of clinical practice support safe, quality clinical care                                 |
| Documented corporate and clinical policies and procedures assist the organisation to provide safe, quality health care                       |
| Safety management systems ensure safety and wellbeing of consumers/patients, staff, visitors and contractors                                 |
| Emergency and disaster management supports safe practice and a safe environment                                                              |
| <b>Standards for EQUIP 4 and 5<sup>78</sup></b>                                                                                              |

| Hospital Peer Groups                                     | AIHW Definition                                                                                                                                                                                                                                               | Study Definition |
|----------------------------------------------------------|---------------------------------------------------------------------------------------------------------------------------------------------------------------------------------------------------------------------------------------------------------------|------------------|
| Principal referral and specialist women's and children's | A1 Major city hospitals with > 20,000 acute case-mix adjusted separations and Regional hospitals with >16,000 acute case-mix adjusted separations per annum                                                                                                   | <b>Principal</b> |
|                                                          | A2 Specialised acute women's and children's hospitals with >10,000 acute case-mix adjusted separations per annum                                                                                                                                              |                  |
| Large hospitals                                          | B1 Major city acute hospitals treating > 10,000 acute case-mix adjusted separations per annum                                                                                                                                                                 | <b>Large</b>     |
|                                                          | B2 Regional acute hospitals treating > 8,000 acute case-mix adjusted separations per annum, and remote hospitals with > 5,000 case-mix adjusted separations per annum                                                                                         |                  |
| Medium hospitals                                         | C1 Medium acute hospitals in Regional and Major city areas treating between 5,000 and 10,000 acute case-mix adjusted separations per annum                                                                                                                    | <b>Medium</b>    |
|                                                          | C2 Medium acute hospitals in Regional and Major city areas treating between 2,000 and 5,000 acute case-mix adjusted separations per annum, and acute hospitals treating <2000 acute case-mix adjusted separations per annum but > 2,000 separations per annum |                  |
| Small acute hospitals                                    | D1 Small Regional acute hospitals treating < 2000 acute case-mix adjusted separations per annum                                                                                                                                                               | <b>Small</b>     |
|                                                          | D3 Small remote hospitals (< 5,000 acute case-mix adjusted separations per annum), most are < 2,000 separations                                                                                                                                               |                  |

*Australian Institute of Health and Welfare peer groups*<sup>30</sup>
